# Supplementary material for: A cross-scale multimodal framework identifies clinically actionable immunotherapy biomarkers in melanoma through bulk to single-cell and spatial transcriptomics integration
Source: Research Square preprint supplement (doi:10.21203/rs.3.rs-7167024/v1), 2025-09-22
Supplement: Supplementary file 1 [file 3c39dc3df7fb48647bb571e0.xlsx]

## Sheet: Table S1
Table S1. The main characteristic of datasets uesd in this study
Data type	Consortium or Access number	Website
GWAS data	UK Biobank	https://www.ebi.ac.uk/gwas/studies/GCST90041829
Pre-trained prediction models	GTEx	https://zenodo.org/records/3518299
Bulk data	GSE65904	https://www.ncbi.nlm.nih.gov/geo/
Bulk data	GSE19234	https://www.ncbi.nlm.nih.gov/geo/
Bulk data	GSE22153	https://www.ncbi.nlm.nih.gov/geo/
Bulk data	GSE22154	https://www.ncbi.nlm.nih.gov/geo/
Bulk data	GSE91061	https://www.ncbi.nlm.nih.gov/geo/
Bulk data	GSE46517	https://www.ncbi.nlm.nih.gov/geo/
Single-cell transcription data	GSE215120	https://www.ncbi.nlm.nih.gov/geo/
Single-cell transcription data	GSE148190	https://www.ncbi.nlm.nih.gov/geo/
Single-cell transcription data	GSE151091	https://www.ncbi.nlm.nih.gov/geo/
Spatial transcription data	Human Melanoma, IF Stained (FFPE)	https://www.10xgenomics.com/datasets/human-melanoma-if-stained-ffpe-2-standard
Spatial transcription data	GSM5420750	https://www.ncbi.nlm.nih.gov/geo/

## Sheet: Table S2
Table S2.The significant TWAS analysis results between Skin Not Sun Exposed Suprapubic and melanoma.
gene	gene_name	zscore	pvalue	var_g	n_snps_used	n_snps_in_cov	n_snps_in_model	best_gwas_p	largest_weight
ENSG00000187741.14	FANCA	-10.2163	1.68e-24	0.006411	1	1	1	1.68e-24	0.131314
ENSG00000003249.13	DBNDD1	7.84983	4.17e-15	0.185044	4	4	4	8.24e-21	0.831162
ENSG00000101440.9	ASIP	7.68678	1.51e-14	0.033905	1	1	1	1.51e-14	0.476995
ENSG00000099810.18	MTAP	7.08634	1.38e-12	0.028397	2	2	2	7.61e-13	0.227694
ENSG00000049656.13	CLPTM1L	-6.82792	8.62e-12	0.013438	2	2	2	1.17e-11	0.178212
ENSG00000198646.13	NCOA6	6.00092	1.96e-09	0.0039	2	2	2	1.84e-09	0.125894
ENSG00000015413.9	DPEP1	5.14607	2.66e-07	0.004554	2	2	2	6.87e-17	0.084953
ENSG00000147889.17	CDKN2A	4.57883	4.68e-06	1.19e-05	1	1	1	4.68e-06	0.020882
ENSG00000169604.19	ANTXR1	-4.24284	2.21e-05	2.84e-05	1	1	1	2.21e-05	0.017732
ENSG00000185324.21	CDK10	-4.18519	2.85e-05	0.096664	2	4	4	1.32e-12	0.331565
ENSG00000107960.10	STN1	-4.17642	2.96e-05	0.027336	2	2	2	3.31e-07	0.391497
ENSG00000167523.13	SPATA33	-4.01753	5.88e-05	0.014584	2	2	2	7.97e-06	0.157239
ENSG00000135823.13	STX6	3.96354	7.38e-05	0.000527	1	1	1	7.38e-05	0.035564
ENSG00000161277.10	THAP8	-3.94709	7.91e-05	0.034421	1	1	1	7.91e-05	0.25569
ENSG00000084110.10	HAL	-3.92238	8.77e-05	0.314846	4	4	4	1.84e-05	0.485832
ENSG00000260259.1	LINC02166	-3.91126	9.18e-05	0.032613	1	2	2	9.18e-05	0.259532
ENSG00000141013.16	GAS8	3.86554	0.000111	0.095319	5	5	5	8.24e-21	0.363494
ENSG00000125977.6	EIF2S2	-3.81129	0.000138	0.001573	1	1	1	0.000138	0.057544
ENSG00000273507.4	RP11-50D16.4	3.81125	0.000138	0.000214	2	2	2	0.000333	0.063589
ENSG00000275784.1	RP5-1125A11.6	3.7544	0.000174	0.050571	1	1	1	0.000174	0.325006
ENSG00000276073.1	RP5-1125A11.7	3.75296	0.000175	0.126425	2	2	2	0.000174	0.514017
ENSG00000240747.7	KRBOX1	3.59801	0.000321	0.0015	1	1	1	0.000321	0.05676
ENSG00000158792.15	SPATA2L	3.56077	0.00037	0.012282	2	2	2	0.000124	0.15354
ENSG00000253309.6	SERPINE3	-3.48241	0.000497	0.000819	1	1	1	0.000497	0.151064
ENSG00000182308.6	DCAF4L1	3.46867	0.000523	0.001132	1	1	1	0.000523	0.054529
ENSG00000113946.3	CLDN16	3.41058	0.000648	1.14133	6	6	6	0.00019	0.524084
ENSG00000163357.10	DCST1	3.40177	0.00067	0.000228	1	1	1	0.00067	0.029143
ENSG00000163354.14	DCST2	3.39728	0.000681	0.006918	1	1	1	0.000681	0.160605
ENSG00000240875.5	LINC00886	-3.35371	0.000797	0.549595	5	5	5	3.77e-05	0.936187
ENSG00000122033.14	MTIF3	3.35146	0.000804	0.005763	2	2	2	0.006494	0.11212
ENSG00000134905.16	CARS2	3.342	0.000832	0.159868	3	3	3	0.000785	0.321026
ENSG00000136643.11	RPS6KC1	-3.34147	0.000833	0.01325	1	1	1	0.000833	0.170676
ENSG00000010282.14	HHATL	3.32016	0.0009	0.140361	2	2	2	0.001039	0.405039
ENSG00000100364.18	KIAA0930	3.3201	0.0009	0.003781	3	3	3	0.00267	0.109992
ENSG00000144476.5	ACKR3	3.31844	0.000905	0.048802	1	1	1	0.000905	0.364661
ENSG00000064042.17	LIMCH1	3.31145	0.000928	0.031629	3	3	3	0.000445	0.230097
ENSG00000088451.10	TGDS	3.30772	0.000941	0.00243	1	1	1	0.000941	0.071448
ENSG00000164104.11	HMGB2	-3.30565	0.000948	4.05e-05	1	1	1	0.000948	0.028245
ENSG00000163710.7	PCOLCE2	-3.30469	0.000951	0.018016	1	1	1	0.000951	0.192438
ENSG00000125827.8	TMX4	3.2818	0.001031	0.010289	2	3	3	0.001537	0.275137
ENSG00000153487.12	ING1	3.26793	0.001083	0.001733	1	1	1	0.001083	0.065252
ENSG00000163586.9	FABP1	-3.25693	0.001126	0.015865	2	2	2	0.002072	0.16908
ENSG00000255160.5	RP11-428C19.5	3.25005	0.001154	2.7e-11	1	1	1	0.001154	2.41e-05
ENSG00000160685.13	ZBTB7B	-3.23931	0.001198	0.016787	2	2	2	0.000152	0.165459
ENSG00000130508.10	PXDN	3.22218	0.001272	0.016451	2	2	2	0.001125	0.107165
ENSG00000198380.12	GFPT1	3.20267	0.001362	0.015107	2	2	2	0.001816	0.212329
ENSG00000106025.8	TSPAN12	3.19722	0.001388	0.000224	1	1	1	0.001388	0.058379
ENSG00000066735.14	KIF26A	-3.17244	0.001512	3.85e-06	1	1	1	0.001512	0.010355
ENSG00000023909.9	GCLM	3.15787	0.001589	0.015711	2	2	2	0.004463	0.156083
ENSG00000278389.1	RP11-626G11.6	3.15306	0.001616	0.000284	1	1	1	0.001616	0.023595
ENSG00000171695.10	LKAAEAR1	-3.14022	0.001688	0.002486	1	1	1	0.001688	0.070625
ENSG00000153094.22	BCL2L11	-3.13658	0.001709	0.00865	2	2	2	0.001763	0.210101
ENSG00000100395.14	L3MBTL2	-3.12823	0.001759	0.022986	2	3	3	0.001115	0.161261
ENSG00000134900.11	TPP2	3.12605	0.001772	0.00022	1	1	1	0.001772	0.021683
ENSG00000166189.7	HPS6	-3.12194	0.001797	0.000388	1	1	1	0.001797	0.060545
ENSG00000171700.13	RGS19	-3.10599	0.001896	1.40506	4	4	4	0.001688	0.648358
ENSG00000178773.14	CPNE7	-3.10094	0.001929	0.211895	3	3	3	7.23e-06	0.608838
ENSG00000143537.13	ADAM15	-3.08198	0.002056	0.009914	2	2	2	0.000152	0.116258
ENSG00000155729.12	KCTD18	-3.07978	0.002072	0.001922	1	1	1	0.002072	0.121957
ENSG00000100129.17	EIF3L	-3.07056	0.002137	0.012957	1	1	1	0.002137	0.354262
ENSG00000164609.9	SLU7	3.07047	0.002137	0.018643	2	2	2	0.002124	0.267773
ENSG00000012223.12	LTF	-3.06822	0.002153	0.047688	1	1	1	0.002153	0.309181
ENSG00000259417.2	LINC01314	3.06779	0.002156	0.001429	2	2	2	0.000758	0.063982
ENSG00000055208.18	TAB2	3.05456	0.002254	0.005838	1	1	1	0.002254	0.109578
ENSG00000196814.14	MVB12B	-3.04901	0.002296	0.024822	1	2	2	0.002296	0.284619
ENSG00000137675.4	MMP27	3.04178	0.002352	0.176273	3	3	3	0.00119	0.387265
ENSG00000163393.12	SLC22A15	-3.03903	0.002373	0.011005	2	2	2	0.004983	0.191012
ENSG00000064012.21	CASP8	-3.02554	0.002482	0.716966	4	4	4	0.002511	0.684135
ENSG00000100600.14	LGMN	-3.01532	0.002567	0.000105	1	1	1	0.002567	0.021953
ENSG00000162601.9	MYSM1	3.00909	0.00262	0.002283	1	1	1	0.00262	0.097288
ENSG00000125510.15	OPRL1	-3.00302	0.002673	0.059578	1	1	1	0.002673	0.346224
ENSG00000255874.2	LINC00346	-2.99967	0.002703	0.031844	2	2	2	0.002688	0.301555
ENSG00000182256.12	GABRG3	2.99059	0.002784	4.23e-06	1	1	1	0.002784	0.004351
ENSG00000166439.5	RNF169	2.97024	0.002976	1.48e-06	1	1	1	0.002976	0.005406
ENSG00000091039.16	OSBPL8	-2.96948	0.002983	0.000436	1	1	1	0.002983	0.034237
ENSG00000152953.12	STK32B	-2.96679	0.003009	2.32e-05	1	1	1	0.003009	0.00819
ENSG00000153922.10	CHD1	2.94742	0.003204	0.001324	2	2	2	0.003711	0.105692
ENSG00000064225.12	ST3GAL6	-2.94722	0.003207	0.086247	2	2	2	0.003059	0.388106
ENSG00000181163.13	NPM1	2.94341	0.003246	2.93e-06	1	1	1	0.003246	0.006715
ENSG00000158793.13	NIT1	2.93581	0.003327	0.04112	3	3	3	0.000154	0.611998
ENSG00000166436.15	TRIM66	2.93482	0.003337	0.155426	3	3	3	0.0031	0.562245
ENSG00000116251.9	RPL22	2.93115	0.003377	9.05e-06	1	1	1	0.003377	0.00792
ENSG00000184445.11	KNTC1	2.92453	0.00345	0.009204	2	2	2	0.0078	0.179018
ENSG00000163535.17	SGO2	2.91813	0.003521	0.004002	1	1	1	0.003521	0.180479
ENSG00000188786.9	MTF1	2.9151	0.003556	0.010722	3	3	3	0.003647	0.100402
ENSG00000164512.17	ANKRD55	2.90536	0.003668	0.000252	2	2	2	0.002479	0.042862
ENSG00000187474.4	FPR3	2.90205	0.003707	0.008319	2	2	2	0.004352	0.147384
ENSG00000085788.13	DDHD2	2.89706	0.003767	0.005717	1	1	1	0.003767	0.121738
ENSG00000153560.11	UBP1	-2.89023	0.00385	0.003632	1	1	1	0.00385	0.196674
ENSG00000225791.6	TRAM2-AS1	2.87845	0.003996	0.004389	1	1	1	0.003996	0.096818
ENSG00000258289.8	CHURC1	-2.87682	0.004017	0.389738	1	1	1	0.004017	1.09515
ENSG00000149256.15	TENM4	-2.87147	0.004086	0.004558	2	2	2	0.006743	0.155359
ENSG00000187097.12	ENTPD5	-2.86588	0.004159	0.081363	4	4	4	0.005681	0.261211
ENSG00000074706.13	IPCEF1	-2.86405	0.004183	0.039718	1	1	1	0.004183	0.290033
ENSG00000170430.9	MGMT	2.84761	0.004405	1.05224	5	5	5	0.001074	0.956978
ENSG00000204060.6	FOXO6	-2.84491	0.004442	6.77e-05	1	1	1	0.004442	0.03579
ENSG00000136327.6	NKX2-8	-2.8435	0.004462	1.72e-11	1	1	1	0.004462	6.14e-06
ENSG00000131941.7	RHPN2	2.841	0.004497	0.012893	2	2	2	0.0055	0.160896
ENSG00000078403.16	MLLT10	-2.83876	0.004529	0.003269	1	1	1	0.004529	0.082807
ENSG00000140564.11	FURIN	2.8362	0.004565	0.001367	1	1	1	0.004565	0.05925
ENSG00000205517.12	RGL3	2.83477	0.004586	0.010242	2	2	2	0.031895	0.253565
ENSG00000170801.9	HTRA3	2.83464	0.004588	0.007299	2	2	2	0.016072	0.137378
ENSG00000122884.12	P4HA1	2.81879	0.004821	6.62e-06	1	1	1	0.004821	0.00875
ENSG00000168026.18	TTC21A	-2.81518	0.004875	0.082091	4	4	4	0.00223	0.529448
ENSG00000260588.1	RP11-930P14.2	2.81008	0.004953	0.009534	2	2	2	0.004405	0.186513
ENSG00000168928.12	CTRB2	2.80779	0.004988	2.08e-09	1	1	1	0.004988	0.000188
ENSG00000174606.13	ANGEL2	2.80535	0.005026	0.179581	3	3	3	0.007642	0.465461
ENSG00000188779.10	SKOR1	-2.80457	0.005038	0.072205	2	2	2	0.003888	0.249517
ENSG00000170260.8	ZNF212	2.80271	0.005067	0.098634	5	5	5	0.008556	0.290355
ENSG00000072682.18	P4HA2	2.80187	0.005081	0.001718	1	1	1	0.005081	0.059633
ENSG00000205268.10	PDE7A	-2.80145	0.005087	0.000694	3	3	3	0.037087	0.059289
ENSG00000129214.14	SHBG	2.79134	0.005249	0.004314	1	1	1	0.005249	0.113659
ENSG00000272335.1	RP11-53O19.3	2.79063	0.00526	0.01971	2	2	2	0.004677	0.19143
ENSG00000181631.6	P2RY13	-2.78851	0.005295	0.000185	1	1	1	0.005295	0.090039
ENSG00000175773.12	RP11-121M22.1	-2.78845	0.005296	0.039445	2	2	2	0.005423	0.281769
ENSG00000168036.16	CTNNB1	-2.78676	0.005324	0.002025	1	1	1	0.005324	0.062615
ENSG00000105829.11	BET1	2.77913	0.005451	9.94e-06	1	1	1	0.005451	0.018388
ENSG00000172785.18	CBWD1	-2.77627	0.005499	0.341376	1	4	4	0.005499	0.820991
ENSG00000197081.12	IGF2R	-2.77329	0.005549	0.005298	2	2	2	0.016485	0.164669
ENSG00000166770.10	ZNF667-AS1	-2.76232	0.005739	0.035178	2	2	2	0.006409	0.299659
ENSG00000135108.14	FBXO21	2.75846	0.005807	0.000608	1	1	1	0.005807	0.045099
ENSG00000162736.15	NCSTN	2.75448	0.005879	0.000181	2	2	2	0.008852	0.052394
ENSG00000168356.11	SCN11A	2.74843	0.005988	0.053414	2	2	2	0.00507	0.455159
ENSG00000076650.6	GPATCH1	-2.74814	0.005994	0.01363	1	1	1	0.005994	0.167365
ENSG00000081052.11	COL4A4	2.74508	0.00605	3.13e-05	1	1	1	0.00605	0.018832
ENSG00000197776.7	KLHDC1	-2.74484	0.006054	0.005593	1	1	1	0.006054	0.116053
ENSG00000134765.9	DSC1	-2.74198	0.006107	4.36e-08	1	1	1	0.006107	0.001102
ENSG00000126698.10	DNAJC8	2.74068	0.006131	4.58e-05	1	1	1	0.006131	0.020955
ENSG00000155511.17	GRIA1	2.74051	0.006134	0.000305	1	1	1	0.006134	0.074165
ENSG00000077232.17	DNAJC10	2.74026	0.006139	0.000303	1	1	1	0.006139	0.091829
ENSG00000137171.14	KLC4	-2.73988	0.006146	0.003285	1	1	1	0.006146	0.220271
ENSG00000167283.7	ATP5L	-2.73985	0.006147	0.00012	1	1	1	0.006147	0.028856
ENSG00000125998.7	FAM83C	2.73329	0.00627	0.05013	3	3	3	0.00043	0.249649
ENSG00000145220.13	LYAR	2.73157	0.006303	0.013837	2	2	2	0.002208	0.166739
ENSG00000078747.14	ITCH	2.72639	0.006403	0.008214	1	1	1	0.006403	0.130475
ENSG00000262179.2	RP1-302G2.5	2.72268	0.006475	0.129194	2	2	2	0.000296	0.311548
ENSG00000143612.19	C1orf43	-2.71685	0.006591	0.010596	2	2	2	0.00607	0.140651
ENSG00000170786.12	SDR16C5	-2.71314	0.006665	0.000827	2	2	2	0.006963	0.050206
ENSG00000113719.15	ERGIC1	2.71101	0.006708	0.022512	3	3	3	0.02471	0.19669
ENSG00000156471.12	PTDSS1	-2.70826	0.006764	0.00325	2	2	2	0.00595	0.168412
ENSG00000145996.11	CDKAL1	2.70725	0.006784	0.021884	1	1	1	0.006784	0.234376
ENSG00000119772.16	DNMT3A	2.70634	0.006803	5.17e-07	1	1	1	0.006803	0.001843
ENSG00000142920.16	AZIN2	2.70545	0.006821	0.012205	2	2	2	0.007627	0.175256
ENSG00000101460.12	MAP1LC3A	-2.70279	0.006876	0.013104	1	1	1	0.006876	0.163616
ENSG00000079805.16	DNM2	2.69942	0.006946	0.000749	2	2	2	0.055627	0.072165
ENSG00000010626.14	LRRC23	-2.69824	0.006971	0.251482	1	1	1	0.006971	0.778605
ENSG00000125779.21	PANK2	-2.69384	0.007063	0.050938	2	2	2	0.015796	0.605947
ENSG00000120329.6	SLC25A2	-2.69073	0.00713	0.004155	1	1	1	0.00713	0.210358
ENSG00000128000.15	ZNF780B	2.6891	0.007165	0.000913	2	2	2	0.002854	0.059168
ENSG00000154639.18	CXADR	-2.68811	0.007186	0.009484	3	3	3	0.01179	0.126395
ENSG00000109103.11	UNC119	-2.68807	0.007187	0.003245	1	1	1	0.007187	0.099318
ENSG00000188921.13	HACD4	-2.68782	0.007192	0.426811	4	4	4	0.017049	0.826685
ENSG00000175691.8	ZNF77	-2.68477	0.007258	0.128875	2	2	2	0.006424	1.07299
ENSG00000164530.13	PI16	2.68142	0.007331	0.003083	2	2	2	0.005143	0.118381
ENSG00000185559.13	DLK1	2.67766	0.007414	0.049146	2	2	2	0.029243	0.337083
ENSG00000149231.11	CCDC82	-2.67641	0.007441	1.14567	3	3	3	0.009595	1.22063
ENSG00000149506.11	ZP1	2.6723	0.007533	2.09e-06	1	1	1	0.007533	0.006384
ENSG00000153237.17	CCDC148	-2.66768	0.007638	0.003222	2	2	2	0.001901	0.123144
ENSG00000239732.3	TLR9	-2.66661	0.007662	0.003162	1	1	1	0.007662	0.19462
ENSG00000096060.14	FKBP5	2.66531	0.007692	0.001684	1	1	1	0.007692	0.056974
ENSG00000160213.6	CSTB	2.66203	0.007767	0.184345	3	3	3	0.009268	0.340392
ENSG00000173272.15	MZT2A	-2.65894	0.007839	0.986922	3	3	3	0.022385	1.10331
ENSG00000167118.10	URM1	2.65718	0.00788	0.012589	2	2	2	0.00928	0.168358
ENSG00000132530.16	XAF1	2.65679	0.007889	0.000778	1	2	2	0.007889	0.040207
ENSG00000254636.1	ARMS2	-2.65133	0.008017	0.144549	1	1	1	0.008017	0.756899
ENSG00000166016.5	ABTB2	-2.64936	0.008064	0.000594	1	1	1	0.008064	0.070731
ENSG00000182107.6	TMEM30B	-2.64799	0.008097	0.000635	2	2	2	0.009567	0.108453
ENSG00000147535.16	PLPP5	2.64382	0.008198	0.01249	1	2	2	0.008198	0.179982
ENSG00000179915.22	NRXN1	-2.64221	0.008237	1.08e-06	1	1	1	0.008237	0.005189
ENSG00000132561.13	MATN2	2.64077	0.008272	0.085336	3	3	3	0.022139	0.300848
ENSG00000127554.12	GFER	-2.64043	0.00828	0.064839	1	1	1	0.00828	0.454822
ENSG00000184459.8	BPIFC	-2.63801	0.008339	0.010448	3	3	3	5.79e-05	0.233482
ENSG00000143494.15	VASH2	2.63152	0.0085	0.009026	2	2	2	0.008501	0.134923
ENSG00000128604.19	IRF5	-2.63131	0.008506	0.179028	2	2	2	0.005001	0.333713
ENSG00000166321.13	NUDT13	-2.6309	0.008516	0.118542	1	1	1	0.008516	1.13469
ENSG00000173705.8	SUSD5	-2.62763	0.008598	0.008927	2	2	2	0.016919	0.221134
ENSG00000243819.4	RN7SL832P	2.62455	0.008676	0.072356	2	2	2	0.007769	0.406306
ENSG00000197024.8	ZNF398	2.62287	0.008719	4.06e-05	1	1	1	0.008719	0.022428
ENSG00000165804.15	ZNF219	-2.6206	0.008778	0.002305	1	1	1	0.008778	0.10219
ENSG00000260455.1	NBAT1	2.61896	0.00882	0.010048	1	1	1	0.00882	0.148525
ENSG00000157150.4	TIMP4	2.61714	0.008867	0.000344	1	1	1	0.008867	0.026882
ENSG00000198734.10	F5	-2.61628	0.008889	0.021596	2	2	2	0.007071	0.218744
ENSG00000175376.8	EIF1AD	2.61324	0.008969	0.05165	3	3	3	0.010335	0.190031
ENSG00000171316.11	CHD7	-2.61066	0.009037	0.002001	2	2	2	0.011035	0.073459
ENSG00000138286.14	FAM149B1	2.61041	0.009043	0.009679	1	1	1	0.009043	0.324238
ENSG00000122882.10	ECD	-2.61041	0.009043	0.002	1	1	1	0.009043	0.147395
ENSG00000153879.8	CEBPG	2.61028	0.009047	0.015479	1	1	1	0.009047	0.189112
ENSG00000151461.19	UPF2	-2.60842	0.009096	0.001668	1	1	1	0.009096	0.056792
ENSG00000109944.10	C11orf63	-2.6072	0.009128	0.011279	1	2	2	0.009128	0.462087
ENSG00000179933.5	C14orf119	2.60717	0.009129	0.000626	2	2	2	0.017234	0.061436
ENSG00000163684.11	RPP14	-2.60465	0.009197	0.020175	3	3	3	0.004156	0.263623
ENSG00000274294.1	RP11-20G13.5	-2.60431	0.009206	0.014977	1	1	1	0.009206	0.208752
ENSG00000100104.13	SRRD	-2.6037	0.009222	0.027258	3	3	3	0.01233	0.144951
ENSG00000075415.12	SLC25A3	-2.59686	0.009408	0.007982	1	1	1	0.009408	0.279406
ENSG00000105971.14	CAV2	-2.59625	0.009425	0.012012	1	1	1	0.009425	0.155365
ENSG00000182963.9	GJC1	-2.59214	0.009538	0.003604	1	2	2	0.009538	0.087734
ENSG00000181798.2	LINC00471	2.59084	0.009574	0.541126	3	3	3	0.011385	0.64195
ENSG00000093217.9	XYLB	-2.59008	0.009595	0.000211	1	1	1	0.009595	0.055864
ENSG00000119688.20	ABCD4	-2.58957	0.00961	0.006021	2	2	2	0.004118	0.103364
ENSG00000221926.11	TRIM16	2.5872	0.009676	0.006012	1	1	1	0.009676	0.123542
ENSG00000196689.11	TRPV1	-2.58631	0.009701	0.052633	3	3	3	0.022399	0.414852
ENSG00000161265.14	U2AF1L4	2.58478	0.009744	0.21483	4	4	4	0.023688	0.683975
ENSG00000165322.17	ARHGAP12	-2.58239	0.009812	0.009055	2	2	2	0.022192	0.115095
ENSG00000125107.17	CNOT1	2.58128	0.009843	3.31e-06	1	1	1	0.009843	0.009898
ENSG00000109670.13	FBXW7	2.581	0.009852	2.32e-05	1	1	1	0.009852	0.028079
ENSG00000268471.6	DKFZP434I0714	-2.581	0.009852	0.000193	1	1	1	0.009852	0.081026
ENSG00000163219.11	ARHGAP25	-2.57926	0.009901	0.003863	2	3	3	0.009932	0.096799
ENSG00000091656.15	ZFHX4	-2.57552	0.010009	0.009785	2	2	2	0.007258	0.13658
ENSG00000112812.15	PRSS16	2.57096	0.010142	0.033465	2	2	2	0.013914	0.341672
ENSG00000146094.13	DOK3	2.56962	0.010181	0.020507	3	3	3	0.062171	0.330949
ENSG00000197980.12	LEKR1	2.56832	0.010219	0.124884	1	1	1	0.010219	0.595441
ENSG00000056291.17	NPFFR2	2.56315	0.010373	0.022317	2	2	2	0.012211	0.227182
ENSG00000095319.14	NUP188	-2.56221	0.010401	0.002416	2	2	2	0.050727	0.086887
ENSG00000108883.12	EFTUD2	2.55594	0.01059	0.002941	1	1	1	0.01059	0.079358
ENSG00000164068.15	RNF123	-2.55448	0.010635	0.010098	1	2	2	0.010635	0.143029
ENSG00000177225.16	PDDC1	-2.55423	0.010642	0.012281	2	2	2	0.015665	0.159431
ENSG00000091879.13	ANGPT2	2.55145	0.010728	1.08e-06	1	1	1	0.010728	0.00266
ENSG00000196182.10	STK40	2.54777	0.010842	0.000836	1	1	1	0.010842	0.059097
ENSG00000104332.11	SFRP1	2.54651	0.01088	0.000836	1	1	1	0.01088	0.05175
ENSG00000143751.9	SDE2	2.546	0.010896	0.000344	1	1	1	0.010896	0.040907
ENSG00000204950.3	LRRC10B	2.54464	0.010939	0.001977	1	1	1	0.010939	0.091086
ENSG00000095794.19	CREM	-2.54149	0.011038	0.000779	1	1	1	0.011038	0.040777
ENSG00000263004.1	RP11-166P13.3	-2.54145	0.011039	0.178944	4	4	4	0.000536	0.36792
ENSG00000164251.4	F2RL1	2.54073	0.011062	0.014116	2	2	2	0.055397	0.176354
ENSG00000241322.10	CDRT1	2.53988	0.011089	0.055638	2	3	3	0.019351	0.386588
ENSG00000278029.1	CTD-2240J17.2	-2.5385	0.011133	0.000385	1	1	1	0.011133	0.038531
ENSG00000149311.18	ATM	2.53672	0.01119	0.001421	1	1	1	0.01119	0.055823
ENSG00000004777.18	ARHGAP33	2.53601	0.011212	0.231204	3	3	3	0.015791	0.427052
ENSG00000109854.13	HTATIP2	-2.53424	0.011269	0.006635	2	2	2	0.004035	0.123263
ENSG00000188215.9	DCUN1D3	2.53239	0.011329	2.81e-06	1	1	1	0.011329	0.010164
ENSG00000165914.14	TTC7B	2.52757	0.011486	0.039883	1	1	1	0.011486	0.3702
ENSG00000143569.18	UBAP2L	-2.52723	0.011497	1.55e-06	1	1	1	0.011497	0.004521
ENSG00000107099.15	DOCK8	-2.52466	0.011581	0.109193	4	4	4	0.000119	0.404434
ENSG00000233539.5	AC011294.3	2.52188	0.011673	0.018859	1	1	1	0.011673	0.242491
ENSG00000244607.5	CCDC13	2.52058	0.011716	0.057222	2	2	2	0.031435	0.449674
ENSG00000229676.2	ZNF492	-2.51905	0.011767	0.075716	2	2	2	0.015795	0.6045
ENSG00000157593.18	SLC35B2	2.51836	0.01179	0.001656	1	1	1	0.01179	0.068049
ENSG00000257261.5	RP11-96H19.1	2.51743	0.011821	0.27924	2	2	2	0.025801	0.806194
ENSG00000173578.7	XCR1	-2.51571	0.011879	0.043543	2	2	2	0.020874	0.199892
ENSG00000272092.1	RP11-350N15.5	-2.51502	0.011903	0.006115	2	2	2	0.011413	0.129131
ENSG00000085491.15	SLC25A24	2.51145	0.012024	0.197996	2	3	3	0.011615	0.42412
ENSG00000105997.22	HOXA3	2.51063	0.012052	0.005027	1	1	1	0.012052	0.115563
ENSG00000275874.1	PICSAR	-2.51055	0.012054	0.069644	2	2	2	0.038971	0.48808
ENSG00000169814.12	BTD	-2.50972	0.012083	0.002276	1	1	1	0.012083	0.112976
ENSG00000042286.14	AIFM2	2.50879	0.012114	0.031893	2	3	3	0.007141	0.172318
ENSG00000147689.16	FAM83A	2.50766	0.012153	0.010431	2	2	2	0.038466	0.151855
ENSG00000081791.8	KIAA0141	-2.50624	0.012202	0.009283	2	2	2	0.0119	0.145468
ENSG00000153896.17	ZNF599	-2.4988	0.012461	0.00945	1	1	1	0.012461	0.512996
ENSG00000101019.21	UQCC1	2.49606	0.012558	0.043608	2	2	2	0.00938	0.298254
ENSG00000113558.18	SKP1	-2.495	0.012596	0.004821	2	3	3	0.014853	0.168481
ENSG00000185614.4	FAM212A	-2.49381	0.012638	0.022423	1	1	1	0.012638	0.213087
ENSG00000274209.4	ANTXRL	2.49312	0.012663	0.059584	1	1	1	0.012663	0.433668
ENSG00000139970.16	RTN1	2.48882	0.012817	0.027122	2	2	2	0.01165	0.227963
ENSG00000157343.8	ARMC12	-2.48858	0.012825	0.015656	2	2	2	0.031062	0.125543
ENSG00000114988.11	LMAN2L	2.48785	0.012852	0.017508	2	2	2	0.022113	0.161481
ENSG00000120889.12	TNFRSF10B	2.48767	0.012858	0.013458	1	1	1	0.012858	0.168033
ENSG00000104129.9	DNAJC17	2.4872	0.012875	0.037086	3	3	3	0.00538	0.362745
ENSG00000120645.11	IQSEC3	2.48617	0.012913	0.142786	1	2	2	0.012913	0.544539
ENSG00000177380.13	PPFIA3	-2.48362	0.013005	0.001136	1	1	1	0.013005	0.048749
ENSG00000137414.5	FAM8A1	-2.48307	0.013026	0.012639	1	1	1	0.013026	0.175818
ENSG00000145649.7	GZMA	-2.48092	0.013104	0.001146	3	3	3	0.068618	0.136353
ENSG00000112137.17	PHACTR1	-2.4806	0.013116	0.016558	2	2	2	0.034758	0.209245
ENSG00000155749.12	ALS2CR12	2.4767	0.01326	0.059898	1	1	1	0.01326	0.373775
ENSG00000140479.16	PCSK6	2.47618	0.01328	0.00321	2	2	2	0.003812	0.089767
ENSG00000205358.3	MT1H	-2.47558	0.013302	0.019113	1	1	1	0.013302	0.189134
ENSG00000236700.5	LINC01010	2.47549	0.013305	0.000394	1	1	1	0.013305	0.029056
ENSG00000166164.15	BRD7	-2.47456	0.01334	0.00025	2	2	2	0.013256	0.032093
ENSG00000138160.5	KIF11	2.47027	0.013501	0.000973	2	2	2	0.015823	0.051181
ENSG00000274863.1	RP11-97N19.3	-2.46946	0.013532	0.001074	2	2	2	0.017686	0.087767
ENSG00000100991.11	TRPC4AP	2.46886	0.013555	0.028391	4	4	4	0.000377	0.255785
ENSG00000145604.15	SKP2	-2.46803	0.013586	0.008156	1	2	2	0.013586	0.212626
ENSG00000165233.17	CARD19	-2.46699	0.013625	0.003166	2	3	3	0.081474	0.181718
ENSG00000136908.17	DPM2	2.4634	0.013763	0.021943	1	1	1	0.013763	0.31093
ENSG00000089737.16	DDX24	2.46319	0.013771	0.000753	1	2	2	0.013771	0.042457
ENSG00000145687.16	SSBP2	-2.46296	0.01378	9.23e-06	2	2	2	0.003469	0.012869
ENSG00000176153.11	GPX2	-2.46198	0.013817	0.036725	3	3	3	0.004267	0.215552
ENSG00000185946.15	RNPC3	-2.46137	0.013841	0.004748	1	1	1	0.013841	0.122624
ENSG00000138279.15	ANXA7	2.46063	0.013869	0.00094	1	1	1	0.013869	0.097234
ENSG00000070526.14	ST6GALNAC1	-2.4606	0.013871	0.006447	1	1	1	0.013871	0.110261
ENSG00000187566.5	NHLRC1	2.45988	0.013898	0.022293	2	2	2	0.026026	0.596023
ENSG00000179941.6	BBS10	-2.4593	0.013921	0.018008	2	2	2	0.001764	0.125254
ENSG00000099977.13	DDT	-2.45921	0.013924	0.088501	2	2	2	0.032476	0.510969
ENSG00000198668.10	CALM1	2.45699	0.014011	0.002751	2	2	2	0.001414	0.07007
ENSG00000230606.10	AC159540.1	-2.45616	0.014043	0.30447	1	2	2	0.014043	0.986708
ENSG00000242173.8	ARHGDIG	-2.45491	0.014092	0.034558	2	2	2	0.01099	0.210568
ENSG00000168092.13	PAFAH1B2	-2.45259	0.014183	0.001176	2	2	2	0.010664	0.111293
ENSG00000115556.13	PLCD4	2.4518	0.014215	0.013561	1	2	2	0.014215	0.165535
ENSG00000179855.5	GIPC3	-2.45024	0.014276	0.046423	3	3	3	0.016182	0.484724
ENSG00000214548.14	MEG3	2.44981	0.014293	0.000425	1	1	1	0.014293	0.033966
ENSG00000107897.18	ACBD5	-2.4492	0.014317	5.21e-05	1	1	1	0.014317	0.034222
ENSG00000108064.10	TFAM	2.44797	0.014366	0.024238	2	2	2	0.028498	0.187295
ENSG00000047188.15	YTHDC2	-2.44776	0.014375	0.051429	2	2	2	0.027337	0.213223
ENSG00000116191.17	RALGPS2	-2.44723	0.014396	0.020958	2	2	2	0.014298	0.255284
ENSG00000151883.17	PARP8	-2.44432	0.014513	0.015695	1	1	1	0.014513	0.177682
ENSG00000176771.16	NCKAP5	2.44087	0.014652	2.87e-05	1	1	1	0.014652	0.007944
ENSG00000137875.4	BCL2L10	2.44019	0.01468	0.009071	3	3	3	0.011289	0.124711
ENSG00000144580.13	CNOT9	-2.43827	0.014758	0.000501	2	2	2	0.014734	0.031639
ENSG00000275040.1	RP11-70D24.4	-2.43816	0.014762	9.12e-05	1	1	1	0.014762	0.022458
ENSG00000136986.9	DERL1	2.43531	0.014879	0.003315	3	3	3	0.00262	0.21542
ENSG00000141002.19	TCF25	2.4352	0.014884	0.00408	1	1	1	0.014884	0.118707
ENSG00000242247.10	ARFGAP3	-2.43482	0.014899	0.020897	2	2	2	0.01444	0.205652
ENSG00000240038.6	AMY2B	-2.43366	0.014947	0.025826	3	3	3	0.046467	0.186808
ENSG00000167968.12	DNASE1L2	2.43293	0.014977	0.000384	1	1	1	0.014977	0.028126
ENSG00000120832.9	MTERF2	2.43256	0.014993	0.013754	4	4	4	0.142254	0.215628
ENSG00000274225.1	KB-68A7.1	-2.43252	0.014994	0.011143	2	2	2	0.009049	0.370105
ENSG00000204161.13	C10orf128	-2.42855	0.01516	0.000475	1	1	1	0.01516	0.094428
ENSG00000131899.10	LLGL1	2.42827	0.015171	0.015436	1	1	1	0.015171	0.205926
ENSG00000248360.7	LINC00504	2.4277	0.015195	0.0173	1	1	1	0.015195	0.231094
ENSG00000144063.3	MALL	2.42447	0.015331	0.005886	1	1	1	0.015331	0.121576
ENSG00000112651.11	MRPL2	-2.42354	0.01537	0.001	1	1	1	0.01537	0.119746
ENSG00000134575.9	ACP2	2.42346	0.015373	0.129256	2	2	2	0.027607	0.349126
ENSG00000174306.21	ZHX3	2.42119	0.01547	0.000672	1	1	1	0.01547	0.050563
ENSG00000135929.8	CYP27A1	2.41803	0.015605	0.001434	1	1	1	0.015605	0.052667
ENSG00000129315.10	CCNT1	-2.41766	0.015621	1.71e-05	1	1	1	0.015621	0.017593
ENSG00000112655.15	PTK7	-2.41664	0.015665	0.005834	2	2	2	0.015164	0.223973
ENSG00000130812.10	ANGPTL6	-2.41426	0.015767	0.003713	1	1	1	0.015767	0.087585
ENSG00000120699.12	EXOSC8	-2.41423	0.015769	0.003358	1	1	1	0.015769	0.117827
ENSG00000175309.14	PHYKPL	2.41326	0.01581	0.012713	5	5	5	0.001938	0.168142
ENSG00000166140.17	ZFYVE19	-2.41272	0.015834	0.011157	3	3	3	0.00623	0.179848
ENSG00000163933.9	RFT1	2.41244	0.015846	0.089195	1	1	1	0.015846	0.420926
ENSG00000197766.7	CFD	-2.41152	0.015886	0.004783	2	2	2	0.031933	0.175983
ENSG00000174485.15	DENND4A	-2.40905	0.015994	5.03e-05	1	1	1	0.015994	0.036359
ENSG00000115520.8	COQ10B	-2.409	0.015996	3.6e-06	1	1	1	0.015996	0.002768
ENSG00000204682.5	CASC10	2.40852	0.016018	0.005774	2	2	2	0.016887	0.109417
ENSG00000107104.18	KANK1	2.40528	0.01616	0.014122	2	2	2	0.044847	0.202466
ENSG00000158106.13	RHPN1	2.40319	0.016253	0.171412	3	3	3	0.006308	0.489249
ENSG00000163728.10	TTC14	-2.40204	0.016304	0.005143	1	1	1	0.016304	0.173157
ENSG00000118181.10	RPS25	-2.40074	0.016362	0.00149	1	1	1	0.016362	0.063785
ENSG00000196407.11	THEM5	2.39808	0.016481	8.04e-05	1	2	2	0.016481	0.01718
ENSG00000225556.1	C2CD4D	2.39808	0.016481	0.005299	1	1	1	0.016481	0.139483
ENSG00000168062.9	BATF2	-2.39706	0.016527	0.002091	1	1	1	0.016527	0.137122
ENSG00000102710.19	SUPT20H	-2.39666	0.016545	0.001079	1	1	1	0.016545	0.073489
ENSG00000099290.15	WASHC2A	-2.39588	0.01658	0.085003	1	2	2	0.01658	0.694222
ENSG00000135736.5	CCDC102A	-2.39561	0.016593	0.042838	2	2	2	0.052045	0.511776
ENSG00000082701.14	GSK3B	2.3953	0.016607	0.010791	2	2	2	0.014425	0.139176
ENSG00000226091.7	LINC00937	-2.39468	0.016635	0.113972	1	2	2	0.016635	0.618582
ENSG00000157445.14	CACNA2D3	2.39268	0.016726	0.015804	3	3	3	0.008607	0.143318
ENSG00000257698.1	RP11-620J15.3	2.39209	0.016753	0.01061	2	2	2	0.017245	0.162311
ENSG00000230587.1	AC093609.1	2.39069	0.016817	0.025603	1	1	1	0.016817	0.257191
ENSG00000160404.17	TOR2A	2.39038	0.016831	7.1e-05	1	2	2	0.016831	0.037398
ENSG00000196655.11	TRAPPC4	2.39027	0.016836	0.773015	3	3	3	0.016362	0.737291
ENSG00000214860.4	EVPLL	2.38979	0.016858	0.017037	1	2	2	0.016858	0.224196
ENSG00000273356.1	LINC02019	-2.38842	0.016921	0.034732	2	2	2	0.033847	0.28184
ENSG00000054118.13	THRAP3	-2.38739	0.016968	0.009563	1	1	1	0.016968	0.207408
ENSG00000133433.10	GSTT2B	2.38506	0.017076	1.6538	4	4	4	0.041163	1.70199
ENSG00000175213.2	ZNF408	2.38476	0.01709	0.007159	2	2	2	0.02268	0.10645
ENSG00000124762.13	CDKN1A	-2.38458	0.017099	0.000938	1	1	1	0.017099	0.078137
ENSG00000163935.13	SFMBT1	-2.38456	0.0171	0.015108	2	2	2	0.013743	0.167722
ENSG00000182858.13	ALG12	-2.37694	0.017457	0.020919	1	1	1	0.017457	0.266659
ENSG00000118137.9	APOA1	-2.37677	0.017465	9.39e-05	2	2	2	0.018294	0.033759
ENSG00000151458.11	ANKRD50	2.37647	0.017479	0.020852	2	2	2	0.004542	0.202908
ENSG00000109536.11	FRG1	2.37605	0.017499	0.007203	1	1	1	0.017499	0.140771
ENSG00000254427.1	RP11-430H10.1	2.37305	0.017642	0.228587	3	3	3	0.025457	0.561411
ENSG00000180066.9	C10orf91	2.3688	0.017846	0.175988	2	2	2	0.011138	2.44948
ENSG00000157978.11	LDLRAP1	2.36854	0.017859	0.020246	2	2	2	0.017914	0.201053
ENSG00000189362.11	NEMP2	2.36796	0.017887	0.091537	2	2	2	0.021173	0.286835
ENSG00000105146.12	AURKC	-2.36775	0.017897	0.145967	2	2	2	0.011408	0.3506
ENSG00000121904.17	CSMD2	-2.36713	0.017927	1.78e-05	2	2	2	0.006971	0.003493
ENSG00000073050.11	XRCC1	2.36703	0.017931	0.00037	1	1	1	0.017931	0.08368
ENSG00000221886.3	ZBED8	-2.36653	0.017956	0.00611	1	1	1	0.017956	0.117871
ENSG00000105668.7	UPK1A	-2.36551	0.018005	0.709278	3	3	3	0.016933	1.3515
ENSG00000101412.12	E2F1	-2.3638	0.018089	0.000101	1	1	1	0.018089	0.040638
ENSG00000241945.7	PWP2	-2.36157	0.018198	1.06532	4	4	4	0.007212	1.44248
ENSG00000198125.12	MB	2.36123	0.018214	2.46e-06	1	1	1	0.018214	0.003729
ENSG00000141744.3	PNMT	2.36123	0.018214	0.011967	2	2	2	0.023673	0.087048
ENSG00000165171.10	WBSCR27	-2.35845	0.018351	0.406764	3	4	4	0.004234	1.0461
ENSG00000275832.4	ARHGAP23	-2.35248	0.018649	0.017053	2	2	2	0.041255	0.125483
ENSG00000170525.19	PFKFB3	-2.35226	0.01866	0.00018	2	2	2	0.021185	0.043449
ENSG00000117862.11	TXNDC12	-2.34934	0.018807	0.004296	2	2	2	0.021497	0.20961
ENSG00000188996.4	HUS1B	-2.34811	0.018869	0.006913	1	1	1	0.018869	0.115625
ENSG00000198865.9	CCDC152	-2.34713	0.018919	0.000869	1	1	1	0.018919	0.139779
ENSG00000185792.9	NLRP9	2.34508	0.019023	0.016009	1	1	1	0.019023	0.237578
ENSG00000177156.10	TALDO1	-2.34454	0.019051	0.002372	1	2	2	0.019051	0.072024
ENSG00000132376.19	INPP5K	-2.34196	0.019183	0.004138	2	2	2	0.068449	0.153401
ENSG00000259604.5	RP11-66B24.1	-2.34141	0.019211	0.005563	2	2	2	0.034169	0.362799
ENSG00000113212.6	PCDHB7	2.34099	0.019233	0.000435	2	3	3	0.0305	0.097247
ENSG00000225077.2	LINC00337	2.34059	0.019253	0.004733	2	2	2	0.008315	0.172502
ENSG00000166348.18	USP54	2.33982	0.019293	0.000128	1	1	1	0.019293	0.03592
ENSG00000182782.7	HCAR2	2.33888	0.019342	0.003248	1	2	2	0.019342	0.136478
ENSG00000038219.12	BOD1L1	2.33792	0.019391	0.026057	3	3	3	0.019905	0.325964
ENSG00000161677.11	JOSD2	-2.33695	0.019442	0.002557	2	2	2	0.020171	0.076254
ENSG00000185963.13	BICD2	2.33645	0.019468	0.003067	1	1	1	0.019468	0.194902
ENSG00000186470.13	BTN3A2	-2.33563	0.019511	1.06529	3	3	3	0.016542	1.1887
ENSG00000122986.13	HVCN1	-2.33525	0.019531	0.000368	2	2	2	0.051823	0.121938
ENSG00000025434.18	NR1H3	-2.33181	0.019711	0.004831	2	2	2	0.00917	0.088625
ENSG00000226380.9	AC058791.1	-2.33123	0.019741	0.026131	1	1	1	0.019741	0.361744
ENSG00000137338.5	PGBD1	2.33121	0.019742	0.002343	1	1	1	0.019742	0.131248
ENSG00000182827.8	ACBD3	-2.33046	0.019782	0.009048	2	2	2	0.019843	0.149036
ENSG00000215717.5	TMEM167B	-2.32888	0.019866	0.001592	3	3	3	0.002415	0.091223
ENSG00000278318.4	ZNF229	2.32747	0.01994	0.014168	2	3	3	0.023595	0.193396
ENSG00000235750.9	KIAA0040	-2.32296	0.020182	0.030226	2	2	2	0.026212	0.190717
ENSG00000188282.12	RUFY4	2.32273	0.020194	0.108885	2	2	2	0.018729	0.280427
ENSG00000111203.11	ITFG2	-2.32232	0.020216	0.003149	1	1	1	0.020216	0.110332
ENSG00000159648.11	TEPP	-2.32179	0.020244	0.177979	1	1	1	0.020244	0.841216
ENSG00000267796.7	LIN37	2.32151	0.02026	0.019794	2	2	2	0.022695	0.284484
ENSG00000131473.16	ACLY	2.32107	0.020283	0.003732	2	2	2	0.020796	0.109161
ENSG00000138271.5	GPR87	-2.32098	0.020288	0.001147	2	2	2	0.02106	0.052738
ENSG00000064607.16	SUGP2	-2.32068	0.020304	0.003303	2	2	2	0.073157	0.10514
ENSG00000267107.6	PCAT19	-2.31948	0.020369	0.066646	1	1	1	0.020369	0.421001
ENSG00000086598.10	TMED2	2.31884	0.020404	0.004249	2	2	2	0.021452	0.110759
ENSG00000135913.10	USP37	2.3156	0.02058	0.028358	3	3	3	0.014734	0.21362
ENSG00000165915.13	SLC39A13	-2.31421	0.020656	0.00876	2	2	2	0.028297	0.198965
ENSG00000131771.13	PPP1R1B	-2.31256	0.020747	0.014648	2	2	2	0.020057	0.131623
ENSG00000156042.17	CFAP70	-2.31228	0.020762	0.11092	2	2	2	0.018876	0.598958
ENSG00000111863.12	ADTRP	2.31183	0.020787	0.036008	2	2	2	0.018417	0.27708
ENSG00000163239.12	TDRD10	2.31176	0.020791	0.029344	3	3	3	0.026896	0.204855
ENSG00000184357.4	HIST1H1B	-2.31161	0.020799	2.74e-06	1	1	1	0.020799	0.003923
ENSG00000099800.7	TIMM13	-2.31023	0.020875	0.058158	2	2	2	0.01136	0.424681
ENSG00000182885.16	ADGRG3	-2.30987	0.020896	0.004508	1	1	1	0.020896	0.137821
ENSG00000149743.13	TRPT1	-2.30825	0.020985	0.021216	2	2	2	0.017569	0.354352
ENSG00000154856.12	APCDD1	-2.30791	0.021004	0.02085	2	2	2	0.0466	0.149102
ENSG00000137760.14	ALKBH8	2.30766	0.021018	0.005692	1	1	1	0.021018	0.124518
ENSG00000189143.9	CLDN4	2.30687	0.021062	0.000454	1	1	1	0.021062	0.036633
ENSG00000057019.15	DCBLD2	-2.30625	0.021097	0.1424	3	3	3	0.005498	0.776213
ENSG00000171792.10	RHNO1	-2.30605	0.021108	0.104771	2	2	2	0.026066	0.299714
ENSG00000120341.18	SEC16B	2.30507	0.021163	0.025339	2	2	2	0.01992	0.28382
ENSG00000113361.12	CDH6	-2.30337	0.021258	0.011157	2	2	2	0.021945	0.182921
ENSG00000071051.13	NCK2	-2.30246	0.021309	0.03635	2	2	2	0.001388	0.178241
ENSG00000169258.6	GPRIN1	-2.30058	0.021415	0.185892	5	5	5	0.020678	0.54846
ENSG00000119899.12	SLC17A5	-2.29939	0.021483	0.014535	2	2	2	0.025405	0.102825
ENSG00000136457.9	CHAD	2.29882	0.021515	0.018326	2	2	2	0.023301	0.791035
ENSG00000174891.12	RSRC1	-2.29807	0.021558	0.000246	1	1	1	0.021558	0.03652
ENSG00000102763.17	VWA8	2.2976	0.021584	0.006259	1	1	1	0.021584	0.13899
ENSG00000068650.18	ATP11A	2.2974	0.021596	0.010719	1	1	1	0.021596	0.173611
ENSG00000114854.7	TNNC1	2.29701	0.021618	0.001414	2	2	2	0.013054	0.110633
ENSG00000067221.13	STOML1	2.29671	0.021635	0.031601	1	1	1	0.021635	0.254217
ENSG00000128891.15	C15orf57	2.29469	0.021751	2.11654	3	3	3	0.00889	0.81626
ENSG00000187193.8	MT1X	-2.29421	0.021779	0.051298	2	2	2	0.009596	0.287121
ENSG00000143799.12	PARP1	2.29268	0.021867	0.007617	2	2	2	0.007095	0.133136
ENSG00000170502.12	NUDT9	-2.29229	0.021889	0.005593	1	2	2	0.021889	0.105825
ENSG00000158480.10	SPATA2	-2.29205	0.021903	0.10014	2	2	2	0.019101	0.44436
ENSG00000175426.10	PCSK1	-2.29196	0.021908	0.033002	2	2	2	0.059315	0.218333
ENSG00000162817.6	C1orf115	-2.29164	0.021927	0.003685	1	1	1	0.021927	0.114417
ENSG00000078674.17	PCM1	2.29114	0.021956	0.034848	3	3	3	0.011252	0.298274
ENSG00000182183.14	FAM159A	2.29107	0.021959	0.033007	2	2	2	0.021919	0.258929
ENSG00000257219.5	RP11-54A9.1	2.29066	0.021983	0.006211	1	1	1	0.021983	0.148185
ENSG00000114948.12	ADAM23	2.28967	0.02204	0.055465	3	3	3	0.015628	0.380434
ENSG00000125971.16	DYNLRB1	2.28755	0.022164	4.91e-05	1	1	1	0.022164	0.010582
ENSG00000100393.12	EP300	-2.28486	0.022321	0.004946	2	2	2	0.000747	0.062993
ENSG00000114735.9	HEMK1	-2.28427	0.022356	0.002947	1	2	2	0.022356	0.109084
ENSG00000075886.10	TUBA3D	-2.28377	0.022385	0.017238	1	1	1	0.022385	0.273911
ENSG00000248538.6	RP11-10A14.5	-2.28269	0.022448	0.056846	2	2	2	0.069597	0.725291
ENSG00000187815.9	ZFP69	2.28251	0.022459	0.182623	2	2	2	0.015755	1.00402
ENSG00000165502.6	RPL36AL	2.28165	0.02251	0.346351	2	2	2	0.00728	0.582504
ENSG00000182584.4	ACTL10	2.27779	0.022739	0.019046	2	2	2	0.004355	0.117607
ENSG00000251136.8	RP11-37B2.1	2.27702	0.022785	0.357697	3	3	3	0.030319	0.689749
ENSG00000078246.16	TULP3	-2.27698	0.022787	0.106816	1	1	1	0.022787	0.477213
ENSG00000257526.2	RP11-20E24.1	2.27476	0.022921	0.030462	2	2	2	0.027423	0.423105
ENSG00000107295.9	SH3GL2	-2.27472	0.022922	7.31e-05	2	2	2	0.016201	0.04845
ENSG00000198298.12	ZNF485	-2.27403	0.022964	3.47e-06	1	1	1	0.022964	0.009553
ENSG00000144233.9	AMMECR1L	-2.27145	0.02312	0.009221	1	2	2	0.02312	0.134276
ENSG00000104951.15	IL4I1	2.2714	0.023123	0.000109	1	1	1	0.023123	0.036838
ENSG00000185404.16	SP140L	2.27074	0.023163	0.012194	2	2	2	0.060944	0.152848
ENSG00000135272.10	MDFIC	-2.26951	0.023237	0.004337	1	1	1	0.023237	0.142363
ENSG00000283696.1	RP11-122G18.12	2.26899	0.023269	0.043738	2	2	2	0.073818	0.550016
ENSG00000162694.13	EXTL2	-2.26761	0.023353	0.03054	2	2	2	0.02685	0.25977
ENSG00000135374.9	ELF5	-2.26567	0.023472	0.007511	1	1	1	0.023472	0.132353
ENSG00000113658.16	SMAD5	-2.26177	0.023712	0.010905	1	1	1	0.023712	0.157104
ENSG00000154978.12	VOPP1	-2.26164	0.023719	0.007638	3	3	3	0.008495	0.210543
ENSG00000127578.6	WFIKKN1	-2.25884	0.023893	0.353269	2	2	2	0.026136	0.998156
ENSG00000149571.11	KIRREL3	-2.25755	0.023974	0.002068	1	1	1	0.023974	0.084521
ENSG00000165084.15	C8orf34	2.25696	0.024011	0.011481	1	1	1	0.024011	0.158093
ENSG00000163599.14	CTLA4	2.25688	0.024015	0.000478	1	1	1	0.024015	0.031797
ENSG00000213551.4	DNAJC9	-2.25687	0.024016	0.018583	1	1	1	0.024016	0.424758
ENSG00000106631.8	MYL7	2.25552	0.024101	0.001144	1	1	1	0.024101	0.108767
ENSG00000241595.2	KRTAP9-4	-2.25511	0.024126	0.004484	1	1	1	0.024126	0.092862
ENSG00000158786.4	PLA2G2F	-2.25462	0.024157	0.022597	3	3	3	0.033937	0.176875
ENSG00000176399.3	DMRTA1	2.25385	0.024206	0.97156	2	2	2	0.032606	1.17254
ENSG00000131944.9	FAAP24	2.253	0.024259	0.204527	3	3	3	0.004943	0.472368
ENSG00000167123.18	CERCAM	-2.25182	0.024334	0.01406	1	1	1	0.024334	0.199691
ENSG00000246223.8	LINC01550	-2.25154	0.024351	0.003453	3	3	3	0.01323	0.068001
ENSG00000204516.9	MICB	2.25143	0.024358	0.561542	3	3	3	0.061123	0.874477
ENSG00000143457.10	GOLPH3L	-2.2508	0.024398	0.205139	1	1	1	0.024398	0.661235
ENSG00000166896.7	ATP23	2.25052	0.024416	0.226733	1	1	1	0.024416	0.752714
ENSG00000122386.10	ZNF205	2.25032	0.024429	0.007233	1	1	1	0.024429	0.123326
ENSG00000258279.3	LINC00592	-2.24867	0.024533	0.031441	3	3	3	0.053881	0.309677
ENSG00000163930.9	BAP1	-2.24711	0.024633	0.00031	1	2	2	0.024633	0.052958
ENSG00000111206.12	FOXM1	-2.2465	0.024672	0.00234	3	3	3	0.045492	0.061251
ENSG00000134574.11	DDB2	-2.24334	0.024875	0.064848	2	2	2	0.010709	0.216076
ENSG00000184492.6	FOXD4L1	2.24284	0.024907	0.001215	1	3	3	0.024907	0.062139
ENSG00000151292.17	CSNK1G3	2.24125	0.02501	0.003471	2	2	2	0.087169	0.183327
ENSG00000175315.2	CST6	2.24031	0.025071	0.01974	2	2	2	0.021237	0.147437
ENSG00000182923.16	CEP63	-2.2402	0.025078	0.076781	2	2	2	0.052559	0.577395
ENSG00000132718.8	SYT11	-2.2399	0.025097	0.000592	1	2	2	0.025097	0.037539
ENSG00000116580.18	GON4L	-2.2399	0.025097	0.000135	1	2	2	0.025097	0.017956
ENSG00000205808.5	PLPP6	-2.23533	0.025395	0.004953	1	2	2	0.025395	0.150448
ENSG00000104388.14	RAB2A	-2.23531	0.025397	0.015429	1	1	1	0.025397	0.182576
ENSG00000203722.7	RAET1G	2.23521	0.025404	0.176626	2	2	2	0.021682	0.556128
ENSG00000236819.1	LINC01563	-2.23381	0.025496	0.000112	1	1	1	0.025496	0.038849
ENSG00000130706.12	ADRM1	2.23366	0.025506	3.24e-06	1	1	1	0.025506	0.00816
ENSG00000176171.11	BNIP3	-2.23349	0.025517	0.036326	2	2	2	0.025865	0.28266
ENSG00000137764.19	MAP2K5	-2.23341	0.025522	0.052639	3	3	3	0.030569	0.21468
ENSG00000132300.18	PTCD3	2.23326	0.025532	0.000433	1	1	1	0.025532	0.038221
ENSG00000277972.1	CISD3	2.23317	0.025538	0.04361	3	3	3	0.012841	0.180579
ENSG00000171401.14	KRT13	-2.23034	0.025725	0.001268	1	1	1	0.025725	0.117395
ENSG00000274349.4	ZNF658	-2.22923	0.025798	0.016349	2	2	2	0.040187	0.252169
ENSG00000272369.1	RP11-446N19.1	2.2292	0.025801	0.063509	1	1	1	0.025801	0.399187
ENSG00000072818.11	ACAP1	2.22895	0.025817	0.009304	2	2	2	0.012359	0.114871
ENSG00000185813.10	PCYT2	-2.2282	0.025867	0.001334	1	1	1	0.025867	0.165573
ENSG00000109762.15	SNX25	-2.22801	0.02588	0.002734	2	2	2	0.039686	0.104436
ENSG00000182809.10	CRIP2	-2.22776	0.025896	0.000457	1	1	1	0.025896	0.101446
ENSG00000136754.16	ABI1	2.22692	0.025953	0.001089	2	2	2	0.051217	0.064901
ENSG00000005102.12	MEOX1	2.22521	0.026067	0.027123	2	2	2	0.025336	0.352413
ENSG00000197780.9	TAF13	2.22412	0.02614	0.021654	2	2	2	0.015742	0.25689
ENSG00000143222.11	UFC1	2.22369	0.02617	0.00638	3	3	3	0.032383	0.40797
ENSG00000168310.10	IRF2	-2.22351	0.026181	1.03e-05	1	1	1	0.026181	0.013015
ENSG00000122705.16	CLTA	-2.22237	0.026258	0.002217	2	2	2	0.042496	0.104219
ENSG00000157570.11	TSPAN18	2.21958	0.026448	0.000886	1	1	1	0.026448	0.09568
ENSG00000110446.10	SLC15A3	2.21897	0.026489	0.000201	1	1	1	0.026489	0.025728
ENSG00000139826.5	ABHD13	2.218	0.026555	0.000754	1	1	1	0.026555	0.046849
ENSG00000179133.12	C10orf67	-2.21519	0.026747	0.028798	1	1	1	0.026747	0.234287
ENSG00000164610.8	RP9	-2.21518	0.026747	0.021911	2	2	2	0.006225	0.242371
ENSG00000158406.4	HIST1H4H	2.21517	0.026749	0.002405	2	2	2	0.025511	0.208208
ENSG00000168061.14	SAC3D1	-2.21497	0.026762	0.008831	2	2	2	0.032417	0.135795
ENSG00000140995.16	DEF8	2.21404	0.026826	0.130129	4	4	4	1.62e-09	0.721637
ENSG00000238227.7	C9orf69	2.21398	0.02683	0.014012	2	2	2	0.02757	0.18173
ENSG00000147548.16	NSD3	-2.21333	0.026875	0.001442	2	2	2	0.007068	0.056771
ENSG00000105135.15	ILVBL	-2.2132	0.026884	0.016502	2	2	2	0.019471	0.383124
ENSG00000119711.12	ALDH6A1	2.21318	0.026885	0.007595	2	2	2	0.006721	0.162953
ENSG00000110025.12	SNX15	-2.21298	0.026899	0.026425	1	1	1	0.026899	0.242278
ENSG00000111671.9	SPSB2	-2.21258	0.026926	0.622842	3	3	3	0.025399	0.59482
ENSG00000105323.16	HNRNPUL1	2.21252	0.026931	0.001683	1	1	1	0.026931	0.150413
ENSG00000188729.6	OSTN	2.21093	0.027041	0.064274	2	2	2	0.042078	0.611136
ENSG00000175785.12	PRIMA1	-2.20856	0.027205	0.005447	1	1	1	0.027205	0.164543
ENSG00000175879.8	HOXD8	2.20797	0.027247	3.79e-06	1	1	1	0.027247	0.00304
ENSG00000162613.16	FUBP1	-2.20745	0.027282	0.016119	1	1	1	0.027282	0.325635
ENSG00000143486.15	EIF2D	2.20709	0.027308	0.021035	2	2	2	0.057915	0.198809
ENSG00000148341.17	SH3GLB2	2.20535	0.027429	0.144146	2	2	2	0.01685	0.285514
ENSG00000137574.10	TGS1	-2.20416	0.027513	0.052001	1	1	1	0.027513	0.496836
ENSG00000182952.4	HMGN4	-2.20298	0.027596	0.012626	2	3	3	0.017067	0.25391
ENSG00000087111.20	PIGS	2.20235	0.02764	0.000727	1	2	2	0.02764	0.041143
ENSG00000109107.13	ALDOC	2.20235	0.02764	0.015455	1	1	1	0.02764	0.189753
ENSG00000262468.5	LINC01569	-2.20212	0.027657	0.022555	2	2	2	0.031238	0.233432
ENSG00000185219.16	ZNF445	-2.20189	0.027673	0.001277	1	1	1	0.027673	0.082446
ENSG00000187664.8	HAPLN4	-2.19725	0.028002	0.045531	1	1	1	0.028002	0.303979
ENSG00000117791.15	2025-03-02	-2.19568	0.028115	0.00025	1	1	1	0.028115	0.032279
ENSG00000228634.1	RP4-534N18.2	-2.19541	0.028134	3.32e-08	1	1	1	0.028134	0.001153
ENSG00000178297.12	TMPRSS9	2.1943	0.028214	0.141888	2	2	2	0.01136	0.683361
ENSG00000213995.11	NAXD	-2.19389	0.028243	0.01724	3	3	3	9.53e-05	0.252477
ENSG00000137628.16	DDX60	-2.19169	0.028402	0.002392	2	2	2	0.023471	0.16655
ENSG00000196159.11	FAT4	2.19105	0.028448	0.00089	1	1	1	0.028448	0.045083
ENSG00000261341.6	CTD-2568A17.1	-2.18827	0.02865	0.042275	1	1	1	0.02865	0.46147
ENSG00000073584.18	SMARCE1	2.18686	0.028753	0.036162	2	2	2	0.025235	0.256546
ENSG00000107020.9	PLGRKT	2.18673	0.028763	0.063093	2	2	2	0.011023	0.355222
ENSG00000106638.15	TBL2	2.18601	0.028814	0.051107	3	3	3	0.086336	0.674766
ENSG00000068885.14	IFT80	2.18595	0.028819	0.004005	1	1	1	0.028819	0.097976
ENSG00000221821.3	C6orf226	-2.18553	0.02885	0.044327	2	2	2	0.026269	0.548753
ENSG00000141380.13	SS18	2.18549	0.028853	0.004524	2	2	2	0.045749	0.089567
ENSG00000182993.3	C12orf60	2.18523	0.028872	0.083256	2	2	2	0.029246	0.388079
ENSG00000167767.13	KRT80	-2.18468	0.028912	0.017006	2	2	2	0.042669	0.171479
ENSG00000054690.13	PLEKHH1	2.1829	0.029043	0.00139	1	1	1	0.029043	0.105849
ENSG00000198203.9	SULT1C2	2.18058	0.029214	0.860254	2	2	2	0.047769	1.2597
ENSG00000136104.19	RNASEH2B	2.18041	0.029227	0.177071	2	2	2	0.026445	1.41588
ENSG00000131470.14	PSMC3IP	2.18011	0.029249	0.001345	1	1	1	0.029249	0.057582
ENSG00000111144.9	LTA4H	-2.18005	0.029254	0.00178	1	1	1	0.029254	0.063903
ENSG00000143590.13	EFNA3	-2.17986	0.029268	0.000744	2	2	2	0.040282	0.070602
ENSG00000177200.16	CHD9	-2.1796	0.029287	2.64e-07	1	1	1	0.029287	0.002104
ENSG00000197872.11	FAM49A	-2.17643	0.029523	0.005354	2	2	2	0.030734	0.109152
ENSG00000259448.2	RP11-16E12.1	2.17638	0.029527	0.002337	1	1	1	0.029527	0.178073
ENSG00000185608.8	MRPL40	2.17617	0.029543	0.000127	1	1	1	0.029543	0.016405
ENSG00000126602.10	TRAP1	2.17497	0.029632	0.320836	1	1	1	0.029632	0.861176
ENSG00000162944.10	RFTN2	2.17207	0.029851	0.000264	1	1	1	0.029851	0.049484
ENSG00000010318.20	PHF7	-2.17195	0.029859	0.003558	1	1	1	0.029859	0.209911
ENSG00000152382.5	TADA1	-2.1719	0.029863	0.149235	3	3	3	0.003111	0.307304
ENSG00000132436.11	FIGNL1	-2.1712	0.029916	1.27931	3	3	3	0.003695	0.765515
ENSG00000179409.10	GEMIN4	-2.1699	0.030015	0.004066	2	2	2	0.114241	0.187348
ENSG00000167930.15	FAM234A	2.16747	0.030199	0.009703	1	1	1	0.030199	0.194316
ENSG00000204740.10	MALRD1	-2.16672	0.030256	0.087806	4	4	4	0.133325	0.591522
ENSG00000184144.11	CNTN2	2.16598	0.030312	0.310761	3	3	3	0.007119	0.440166
ENSG00000183751.14	TBL3	-2.16555	0.030345	0.003823	1	1	1	0.030345	0.132255
ENSG00000181061.13	HIGD1A	-2.16552	0.030348	0.000876	1	1	1	0.030348	0.049271
ENSG00000266411.1	RP11-180P8.3	2.16545	0.030353	9.69e-06	1	1	1	0.030353	0.013479
ENSG00000163517.14	HDAC11	2.16421	0.030448	0.00753	3	4	4	0.001057	0.119295
ENSG00000158545.15	ZC3H18	2.16385	0.030476	0.000179	2	2	2	0.08458	0.044496
ENSG00000080802.18	CNOT4	2.16294	0.030546	1.87e-07	1	1	1	0.030546	0.000919
ENSG00000198171.12	DDRGK1	-2.16282	0.030555	0.027999	3	3	3	0.082097	0.197825
ENSG00000100604.12	CHGA	-2.16235	0.030591	0.000644	1	1	1	0.030591	0.037049
ENSG00000121318.2	TAS2R10	2.162	0.030618	0.045317	1	1	1	0.030618	0.304119
ENSG00000067334.13	DNTTIP2	-2.16084	0.030707	0.004777	2	3	3	0.029676	0.095912
ENSG00000003147.17	ICA1	-2.1606	0.030726	0.012493	3	3	3	0.067493	0.376426
ENSG00000069702.10	TGFBR3	-2.15888	0.030859	0.001208	2	2	2	0.029419	0.100411
ENSG00000048707.13	VPS13D	-2.15849	0.03089	0.002639	2	2	2	0.034101	0.158844
ENSG00000172262.11	ZNF131	-2.15835	0.030901	0.001503	2	2	2	0.030663	0.088967
ENSG00000088387.18	DOCK9	2.1577	0.030951	0.013074	2	2	2	0.016457	0.167552
ENSG00000111271.14	ACAD10	2.15764	0.030956	0.000692	1	1	1	0.030956	0.089455
ENSG00000134324.11	LPIN1	2.15712	0.030996	0.029578	1	1	1	0.030996	0.25485
ENSG00000155016.17	CYP2U1	2.15696	0.031009	0.018595	3	4	4	0.002422	0.331428
ENSG00000188613.6	NANOS1	-2.15674	0.031026	0.006642	1	1	1	0.031026	0.127476
ENSG00000181074.3	OR52N4	2.15495	0.031165	0.024638	2	2	2	0.005885	0.572519
ENSG00000181915.4	ADO	2.15485	0.031173	0.005399	1	1	1	0.031173	0.153543
ENSG00000113555.5	PCDH12	-2.15469	0.031186	0.014468	2	2	2	0.054915	0.164674
ENSG00000242259.8	C22orf39	-2.15385	0.031252	0.0055	2	2	2	0.035027	0.140554
ENSG00000105726.16	ATP13A1	-2.15352	0.031278	0.004364	2	2	2	0.02932	0.177719
ENSG00000237927.1	RP3-393E18.2	-2.15338	0.031289	0.046093	3	3	3	0.010483	0.275462
ENSG00000105793.15	GTPBP10	-2.15284	0.031331	0.228041	6	6	6	0.099941	0.633011
ENSG00000152684.10	PELO	2.15096	0.031479	0.043582	3	4	4	0.029039	0.602338
ENSG00000179397.17	C1orf101	2.15074	0.031497	0.021581	2	3	3	0.053217	0.211635
ENSG00000160606.10	TLCD1	2.1504	0.031523	0.006711	1	1	1	0.031523	0.12512
ENSG00000100271.16	TTLL1	2.14959	0.031588	0.024133	2	2	2	0.062057	0.303926
ENSG00000183963.18	SMTN	-2.14957	0.031589	0.000102	2	2	2	0.035084	0.017854
ENSG00000163660.11	CCNL1	-2.14947	0.031597	6.61e-06	1	1	1	0.031597	0.008699
ENSG00000111674.8	ENO2	2.14892	0.03164	0.000515	1	1	1	0.03164	0.034523
ENSG00000245685.6	AF146191.4	-2.1484	0.031682	0.05243	2	2	2	0.013772	0.299436
ENSG00000205420.10	KRT6A	2.14749	0.031754	0.000559	1	2	2	0.031754	0.032419
ENSG00000139626.15	ITGB7	-2.14736	0.031765	0.008182	2	2	2	0.030428	0.239853
ENSG00000267612.1	CTD-3116E22.7	-2.1458	0.031889	0.03216	2	2	2	0.026069	0.227552
ENSG00000187486.5	KCNJ11	-2.14496	0.031956	0.398777	4	4	4	0.049158	0.524558
ENSG00000173801.16	JUP	2.14451	0.031992	0.000493	1	1	1	0.031992	0.032758
ENSG00000225194.2	LINC00092	-2.14437	0.032003	0.013013	1	1	1	0.032003	0.311239
ENSG00000106554.11	CHCHD3	2.14388	0.032042	0.000981	2	2	2	0.007277	0.106181
ENSG00000006047.12	YBX2	-2.14373	0.032054	0.005528	1	1	1	0.032054	0.136934
ENSG00000165238.16	WNK2	-2.14269	0.032138	0.022477	2	2	2	0.01304	0.521676
ENSG00000244219.6	GS1-259H13.2	-2.14265	0.032141	0.060908	2	2	2	0.042203	0.556235
ENSG00000170175.10	CHRNB1	-2.14162	0.032224	0.062421	1	1	1	0.032224	0.46913
ENSG00000204657.3	OR2H2	2.14051	0.032314	0.020268	1	2	2	0.032314	0.202606
ENSG00000165457.13	FOLR2	2.13997	0.032357	0.001461	2	2	2	0.014648	0.082091
ENSG00000180884.9	ZNF792	-2.13953	0.032393	0.019652	1	2	2	0.032393	0.266026
ENSG00000124253.10	PCK1	-2.13869	0.032461	0.037728	2	2	2	0.079706	0.212209
ENSG00000068724.15	TTC7A	-2.13803	0.032514	0.004783	1	1	1	0.032514	0.148323
ENSG00000260377.1	RP11-646E18.4	2.13796	0.03252	0.405938	3	3	3	0.020709	0.392852
ENSG00000196109.6	ZNF676	2.13766	0.032544	0.027814	1	1	1	0.032544	0.249383
ENSG00000149428.18	HYOU1	-2.13739	0.032566	4.3e-05	2	2	2	0.08426	0.011516
ENSG00000234880.1	LINC00163	2.13509	0.032754	0.024421	2	2	2	0.025388	0.20531
ENSG00000108306.11	FBXL20	-2.13496	0.032765	0.004044	1	2	2	0.032765	0.103843
ENSG00000100592.15	DAAM1	2.13237	0.032976	0.004725	2	2	2	0.069586	0.13398
ENSG00000240021.9	TEX35	2.1292	0.033238	0.036146	1	1	1	0.033238	0.40658
ENSG00000051128.18	HOMER3	-2.12821	0.033319	0.01266	3	3	3	0.053922	0.332196
ENSG00000144115.16	THNSL2	-2.12728	0.033397	1.20138	4	4	4	0.087998	1.22802
ENSG00000125870.10	SNRPB2	2.12709	0.033413	0.000539	2	2	2	0.020885	0.052011
ENSG00000132763.14	MMACHC	2.1261	0.033495	0.0084	2	3	3	0.026641	0.158798
ENSG00000167103.11	PIP5KL1	2.12584	0.033516	0.009285	2	3	3	0.030786	0.315871
ENSG00000204859.12	ZBTB48	-2.12527	0.033564	0.00571	2	2	2	0.076402	0.105873
ENSG00000172197.10	MBOAT1	2.1248	0.033603	0.060347	2	2	2	0.040134	0.388281
ENSG00000007944.14	MYLIP	2.1242	0.033653	0.013205	1	1	1	0.033653	0.168361
ENSG00000171960.10	PPIH	2.12381	0.033686	0.000529	1	1	1	0.033686	0.088388
ENSG00000273142.1	RP11-458F8.4	2.12276	0.033774	0.097374	2	3	3	0.06289	0.621247
ENSG00000130940.14	CASZ1	-2.12105	0.033918	9.33e-05	1	1	1	0.033918	0.030201
ENSG00000008118.9	CAMK1G	2.11975	0.034027	0.011045	1	1	1	0.034027	0.153687
ENSG00000143452.15	HORMAD1	-2.11906	0.034086	0.579021	1	2	2	0.034086	1.10889
ENSG00000132109.9	TRIM21	-2.11817	0.034161	0.002582	1	1	1	0.034161	0.077923
ENSG00000213471.9	TTLL13P	2.11814	0.034163	0.002296	1	1	1	0.034163	0.074521
ENSG00000181649.5	PHLDA2	-2.11806	0.03417	0.002124	1	1	1	0.03417	0.06746
ENSG00000172551.10	MUCL1	2.11608	0.034338	0.007754	2	2	2	0.035196	0.14233
ENSG00000198042.10	MAK16	-2.11602	0.034343	0.002209	2	2	2	0.088217	0.194335
ENSG00000128011.4	LRFN1	-2.11481	0.034446	0.01795	2	2	2	0.028584	0.261171
ENSG00000137558.7	PI15	-2.1144	0.034481	0.032914	2	2	2	0.054268	0.974381
ENSG00000112996.10	MRPS30	-2.11372	0.034539	0.001893	1	2	2	0.034539	0.229618
ENSG00000099889.13	ARVCF	-2.11345	0.034563	0.042145	2	2	2	0.021957	0.316905
ENSG00000163982.5	OTOP1	2.11343	0.034564	0.145558	2	3	3	0.03224	0.372188
ENSG00000140545.14	MFGE8	2.11342	0.034565	0.003313	4	4	4	0.12013	0.133358
ENSG00000255374.3	TAS2R43	2.1116	0.034721	0.000555	1	2	2	0.034721	0.149102
ENSG00000213047.12	DENND1B	-2.11084	0.034786	0.007608	1	1	1	0.034786	0.123822
ENSG00000174600.13	CMKLR1	-2.10967	0.034887	0.000715	1	1	1	0.034887	0.042638
ENSG00000130707.17	ASS1	2.10914	0.034933	0.032143	2	2	2	0.028849	0.393385
ENSG00000143379.12	SETDB1	2.10897	0.034947	0.017128	1	1	1	0.034947	0.194363
ENSG00000272791.1	RP11-464F9.22	-2.10825	0.035009	0.002765	1	1	1	0.035009	0.192085
ENSG00000148343.18	MIGA2	-2.10787	0.035042	0.001229	1	1	1	0.035042	0.095362
ENSG00000073670.13	ADAM11	-2.10671	0.035142	0.015689	2	2	2	0.039278	0.245528
ENSG00000137876.9	RSL24D1	-2.10645	0.035165	0.014599	4	4	4	0.134849	0.281271
ENSG00000129055.12	ANAPC13	-2.10296	0.03547	0.104679	1	1	1	0.03547	0.503518
ENSG00000246548.3	RP11-7F17.5	2.10169	0.03558	0.005588	1	1	1	0.03558	0.113909
ENSG00000198858.9	R3HDM4	-2.10143	0.035603	0.002803	1	2	2	0.035603	0.074278
ENSG00000188051.6	TMEM221	-2.10107	0.035635	0.037806	2	2	2	0.030469	0.261016
ENSG00000114742.13	WDR48	-2.10097	0.035644	0.008127	1	1	1	0.035644	0.201335
ENSG00000065243.19	PKN2	2.10073	0.035665	0.000128	1	1	1	0.035665	0.061659
ENSG00000106077.18	ABHD11	2.10019	0.035713	0.325892	3	4	4	0.034954	0.555471
ENSG00000100485.11	SOS2	-2.09996	0.035732	0.016981	2	2	2	0.03928	0.27517
ENSG00000244752.2	CRYBB2	2.0999	0.035737	0.064664	2	2	2	0.130255	0.508033
ENSG00000141076.17	UTP4	-2.09846	0.035865	0.045235	1	1	1	0.035865	0.766331
ENSG00000165475.13	CRYL1	-2.09821	0.035887	0.252092	3	3	3	0.061601	0.464008
ENSG00000168275.14	COA6	-2.09799	0.035906	0.075722	2	2	2	0.037398	0.382813
ENSG00000156795.6	WDYHV1	2.09627	0.036058	0.22052	2	2	2	0.046946	0.485398
ENSG00000077097.15	TOP2B	-2.09576	0.036103	0.001545	1	1	1	0.036103	0.061888
ENSG00000146425.10	DYNLT1	2.09373	0.036284	0.015555	1	1	1	0.036284	0.181663
ENSG00000221909.2	FAM200A	-2.09247	0.036397	4.18e-07	1	1	1	0.036397	0.001594
ENSG00000160233.7	LRRC3	-2.0905	0.036573	0.053745	3	3	3	0.018517	0.626098
ENSG00000269729.1	AC006262.4	2.08921	0.036688	0.00567	2	2	2	0.090669	0.156929
ENSG00000186230.6	ZNF749	2.08818	0.036782	0.193303	2	2	2	0.030154	0.644728
ENSG00000279873.2	LINC01126	2.08748	0.036845	0.020215	2	2	2	0.123957	0.305891
ENSG00000124243.17	BCAS4	2.08712	0.036877	0.000588	2	2	2	0.104218	0.106544
ENSG00000277587.1	CTD-3116E22.8	-2.08609	0.036971	0.044061	2	2	2	0.027022	0.208847
ENSG00000108448.20	TRIM16L	2.08499	0.03707	0.044916	2	4	4	0.022908	0.355717
ENSG00000254610.2	RP5-903G2.2	2.08482	0.037085	0.069079	3	3	3	0.033438	0.278061
ENSG00000150961.14	SEC24D	-2.08442	0.037122	0.015765	2	2	2	0.012273	0.311802
ENSG00000115524.15	SF3B1	2.08429	0.037134	0.007502	1	1	1	0.037134	0.132991
ENSG00000176909.11	MAMSTR	2.0827	0.037279	0.004423	2	2	2	0.040772	0.121099
ENSG00000167992.12	VWCE	-2.08215	0.037329	4.53e-05	1	2	2	0.037329	0.070061
ENSG00000100528.11	CNIH1	-2.08096	0.037438	0.027533	2	2	2	0.063011	0.307406
ENSG00000197208.5	SLC22A4	-2.08073	0.037458	0.006448	1	1	1	0.037458	0.124569
ENSG00000160284.14	SPATC1L	2.07871	0.037644	0.521315	3	4	4	0.046202	1.02285
ENSG00000113211.5	PCDHB6	2.0778	0.037727	0.008703	1	1	1	0.037727	0.173426
ENSG00000089154.10	GCN1	2.0768	0.03782	0.017293	3	3	3	0.060004	0.179122
ENSG00000188038.7	NRN1L	2.07634	0.037862	0.005994	1	1	1	0.037862	0.271096
ENSG00000181744.8	C3orf58	2.07589	0.037904	0.008982	1	1	1	0.037904	0.132176
ENSG00000198039.11	ZNF273	2.07555	0.037936	0.157682	4	4	4	0.044337	0.442962
ENSG00000136811.16	ODF2	-2.07322	0.038151	0.016333	1	1	1	0.038151	0.205835
ENSG00000164818.15	DNAAF5	-2.07289	0.038183	0.098716	3	3	3	0.034923	0.333426
ENSG00000185652.11	NTF3	2.07287	0.038184	0.014671	1	2	2	0.038184	0.221651
ENSG00000090382.6	LYZ	-2.07283	0.038189	0.084278	2	2	2	0.037483	0.394172
ENSG00000164880.15	INTS1	2.07277	0.038193	0.644785	3	3	3	0.025693	0.465357
ENSG00000170477.12	KRT4	2.07246	0.038223	1.68e-05	1	1	1	0.038223	0.007304
ENSG00000169299.13	PGM2	-2.07213	0.038254	0.002036	2	2	2	0.066954	0.073828
ENSG00000250506.7	CDK3	-2.07212	0.038254	0.16972	3	4	4	0.041606	0.714872
ENSG00000161010.14	MRNIP	2.07171	0.038292	0.033031	1	1	1	0.038292	0.666416
ENSG00000149196.15	HIKESHI	-2.07123	0.038337	0.004988	2	2	2	0.004496	0.379114
ENSG00000214900.9	LINC01588	2.07045	0.03841	0.029621	3	3	3	0.006913	0.209205
ENSG00000110400.10	NECTIN1	2.06966	0.038485	0.001607	2	2	2	0.017585	0.079415
ENSG00000103199.13	ZNF500	-2.06477	0.038945	0.100418	2	2	2	0.079085	0.376489
ENSG00000116691.10	MIIP	-2.0645	0.03897	0.030526	2	2	2	0.041315	0.246759
ENSG00000198848.12	CES1	-2.06393	0.039024	0.111299	4	4	4	0.009778	0.498726
ENSG00000155792.9	DEPTOR	-2.06291	0.039122	0.035348	2	2	2	0.043269	0.256761
ENSG00000068654.15	POLR1A	-2.06242	0.039168	0.061272	3	3	3	0.025451	0.382327
ENSG00000181577.15	C6orf223	-2.06194	0.039214	0.000141	2	2	2	0.033984	0.036635
ENSG00000162695.11	SLC30A7	2.05892	0.039502	0.000181	1	1	1	0.039502	0.028996
ENSG00000168291.12	PDHB	-2.05848	0.039544	0.027549	2	2	2	0.039502	0.298841
ENSG00000162543.5	UBXN10	-2.05837	0.039555	0.000225	1	1	1	0.039555	0.028671
ENSG00000183844.16	FAM3B	2.05802	0.039588	0.038952	4	4	4	0.047313	0.401058
ENSG00000175283.7	DOLK	-2.05783	0.039606	0.007427	2	2	2	0.042801	0.130988
ENSG00000171773.2	NXNL1	2.05635	0.039749	0.012969	2	2	2	0.175509	0.207279
ENSG00000130816.14	DNMT1	2.0552	0.03986	0.005343	1	1	1	0.03986	0.107368
ENSG00000136824.18	SMC2	-2.05519	0.039861	0.073732	4	4	4	0.022071	0.2229
ENSG00000143157.11	POGK	2.05419	0.039957	0.005089	1	1	1	0.039957	0.106825
ENSG00000168802.12	CHTF8	2.05404	0.039971	0.001704	1	1	1	0.039971	0.063073
ENSG00000185917.13	SETD4	-2.0534	0.040034	0.01484	2	2	2	0.049614	0.155022
ENSG00000128652.11	HOXD3	2.05316	0.040057	0.032979	4	4	4	0.039618	0.200188
ENSG00000175220.11	ARHGAP1	2.05144	0.040224	0.01789	2	2	2	0.02268	0.180457
ENSG00000198556.13	ZNF789	-2.05113	0.040255	0.000425	2	2	2	0.077758	0.041167
ENSG00000129151.8	BBOX1	2.04948	0.040415	0.031114	3	3	3	0.024057	0.253263
ENSG00000272047.1	GTF2H5	-2.0492	0.040443	0.014276	2	2	2	0.033233	0.374626
ENSG00000137843.11	PAK6	2.04919	0.040443	7.09e-06	1	1	1	0.040443	0.00686
ENSG00000132522.15	GPS2	-2.04855	0.040506	0.008469	3	3	3	0.032054	0.130534
ENSG00000159110.19	IFNAR2	-2.04787	0.040573	0.053841	4	5	5	0.070227	0.611395
ENSG00000135597.18	REPS1	-2.04603	0.040753	0.000277	2	2	2	0.038397	0.029683
ENSG00000230939.1	RP11-314C16.1	2.04511	0.040844	0.123091	1	1	1	0.040844	0.507333
ENSG00000101150.17	TPD52L2	-2.04442	0.040912	0.003231	1	2	2	0.040912	0.177763
ENSG00000161692.17	DBF4B	-2.04411	0.040942	0.174092	3	3	3	0.033279	0.779938
ENSG00000227888.4	FAM66A	2.04402	0.040952	0.07469	2	5	5	0.017875	0.38429
ENSG00000182400.14	TRAPPC6B	2.04331	0.041022	0.007744	2	2	2	0.058538	0.202364
ENSG00000119715.14	ESRRB	2.04283	0.04107	0.086682	1	1	1	0.04107	0.416664
ENSG00000160882.11	CYP11B1	2.04265	0.041087	4.06e-05	1	1	1	0.041087	0.050284
ENSG00000128709.12	HOXD9	2.04232	0.04112	0.005496	2	2	2	0.032764	0.070371
ENSG00000145730.20	PAM	2.04125	0.041226	0.005912	1	1	1	0.041226	0.111521
ENSG00000106633.15	GCK	-2.04058	0.041292	0.092897	2	3	3	0.037231	0.367138
ENSG00000176946.11	THAP4	-2.03947	0.041403	0.002359	2	2	2	0.059546	0.146756
ENSG00000143811.18	PYCR2	-2.03917	0.041433	0.083677	1	1	1	0.041433	0.958288
ENSG00000052344.15	PRSS8	2.03882	0.041468	0.001325	2	2	2	0.043137	0.05864
ENSG00000108773.10	KAT2A	-2.03759	0.041591	0.000175	1	1	1	0.041591	0.050315
ENSG00000085644.13	ZNF213	-2.03711	0.041639	0.019445	2	3	3	0.028869	0.194578
ENSG00000198824.5	CHAMP1	-2.03666	0.041684	5.7e-05	1	1	1	0.041684	0.014214
ENSG00000160818.16	GPATCH4	-2.03652	0.041698	0.00779	2	2	2	0.07133	0.203973
ENSG00000113407.13	TARS	2.03589	0.041762	0.024102	3	3	3	0.054309	0.525927
ENSG00000245330.4	KB-1471A8.1	2.03576	0.041775	0.032318	1	1	1	0.041775	0.247428
ENSG00000110092.3	CCND1	2.03409	0.041943	5.27e-10	1	1	1	0.041943	0.000114
ENSG00000105227.14	PRX	-2.03385	0.041967	1.69e-09	1	1	1	0.041967	0.000156
ENSG00000112659.13	CUL9	2.03303	0.04205	0.007146	1	1	1	0.04205	0.211573
ENSG00000099785.10	2025-03-02	-2.03204	0.04215	0.116367	2	2	2	0.049081	0.499749
ENSG00000120256.9	LRP11	2.03202	0.042152	0.646401	3	3	3	0.021682	0.434091
ENSG00000087460.24	GNAS	2.03153	0.042202	0.000284	2	2	2	0.062796	0.076164
ENSG00000076984.17	MAP2K7	-2.03013	0.042343	0.004609	2	2	2	0.033465	0.094453
ENSG00000179532.12	DNHD1	-2.02925	0.042433	0.009739	2	2	2	0.02883	0.137579
ENSG00000146409.10	SLC18B1	2.02911	0.042447	0.05303	4	4	4	0.035666	0.538017
ENSG00000235888.1	AF064858.8	-2.02882	0.042477	0.015936	3	3	3	0.082775	0.144525
ENSG00000182134.15	TDRKH	-2.02853	0.042507	0.119059	3	3	3	0.028125	0.29464
ENSG00000126254.11	RBM42	-2.02835	0.042525	0.000199	1	1	1	0.042525	0.046968
ENSG00000148204.11	CRB2	2.02827	0.042532	0.006189	3	3	3	0.058683	0.156679
ENSG00000213057.5	C1orf220	-2.0275	0.042611	0.055263	2	2	2	0.030288	0.233161
ENSG00000213996.12	TM6SF2	-2.02735	0.042626	0.025073	1	1	1	0.042626	0.225347
ENSG00000167676.4	PLIN4	2.02728	0.042634	0.000338	2	2	2	0.060949	0.048625
ENSG00000177453.7	NIM1K	2.02666	0.042697	0.040416	1	1	1	0.042697	0.407722
ENSG00000057252.12	SOAT1	-2.02656	0.042708	0.001949	2	2	2	0.00744	0.074165
ENSG00000114738.10	MAPKAPK3	-2.02633	0.042731	0.000594	2	2	2	0.046909	0.054224
ENSG00000125144.13	MT1G	-2.02606	0.042759	0.066289	3	3	3	0.013302	0.372289
ENSG00000281912.1	LINC01144	-2.02573	0.042792	0.010545	1	1	1	0.042792	0.159436
ENSG00000132821.11	VSTM2L	2.02484	0.042884	0.007789	1	1	1	0.042884	0.211353
ENSG00000143387.12	CTSK	2.02443	0.042926	0.000486	1	1	1	0.042926	0.052189
ENSG00000116237.15	ICMT	-2.02442	0.042927	0.031575	3	4	4	0.016477	0.552271
ENSG00000179477.9	ALOX12B	-2.02359	0.043013	0.004503	2	3	3	0.000157	0.157102
ENSG00000129696.12	TTI2	2.02348	0.043023	1.63e-05	1	1	1	0.043023	0.009009
ENSG00000113384.13	GOLPH3	2.0231	0.043063	0.003086	2	2	2	0.019094	0.249771
ENSG00000162069.14	BICDL2	-2.02161	0.043217	0.219382	3	3	3	0.033515	0.426756
ENSG00000163040.14	CCDC74A	-2.02158	0.04322	0.017194	2	2	2	0.044815	0.294586
ENSG00000182870.12	GALNT9	-2.02092	0.043288	0.011659	1	1	1	0.043288	0.163137
ENSG00000171703.16	TCEA2	2.02089	0.043292	0.028369	3	3	3	0.045068	0.139017
ENSG00000271605.5	MILR1	-2.02075	0.043306	0.068879	3	3	3	0.005804	0.485161
ENSG00000231604.2	RP5-897D18.1	2.01973	0.043411	3.94e-06	1	1	1	0.043411	0.005784
ENSG00000157601.13	MX1	-2.01938	0.043447	0.124705	3	3	3	0.081651	0.377854
ENSG00000110536.13	PTPMT1	-2.01819	0.043572	0.003371	2	2	2	0.032531	0.387829
ENSG00000179178.10	TMEM125	2.01637	0.043762	6.54e-06	1	1	1	0.043762	0.00622
ENSG00000037637.10	FBXO42	2.01599	0.043801	0.002861	2	2	2	0.056684	0.05453
ENSG00000172216.5	CEBPB	-2.01589	0.043812	3.57e-06	1	1	1	0.043812	0.002689
ENSG00000085382.11	HACE1	2.01576	0.043825	0.041153	2	2	2	0.072691	0.204132
ENSG00000001460.17	STPG1	2.01548	0.043855	0.107809	3	3	3	0.012426	0.246824
ENSG00000133246.11	PRAM1	2.0154	0.043863	0.078194	2	2	2	0.051585	0.324486
ENSG00000108370.16	RGS9	-2.01436	0.043972	0.073867	1	1	1	0.043972	0.515276
ENSG00000123374.10	CDK2	2.01348	0.044064	0.000357	1	2	2	0.044064	0.053469
ENSG00000236975.1	RP5-1065P14.2	-2.01316	0.044097	0.03627	1	1	1	0.044097	0.265594
ENSG00000183826.16	BTBD9	2.01232	0.044187	0.014051	2	2	2	0.043869	0.166951
ENSG00000166828.2	SCNN1G	-2.01223	0.044196	2.69e-05	1	1	1	0.044196	0.007643
ENSG00000025293.16	PHF20	-2.01112	0.044313	0.002927	1	2	2	0.044313	0.11885
ENSG00000141505.11	ASGR1	-2.01075	0.044352	0.002984	2	3	3	0.005261	0.097683
ENSG00000183763.8	TRAIP	-2.01072	0.044355	0.000566	1	1	1	0.044355	0.036932
ENSG00000104635.13	SLC39A14	-2.01048	0.04438	0.002276	2	2	2	0.121612	0.09003
ENSG00000171466.9	ZNF562	2.0094	0.044494	0.012652	2	2	2	0.032469	0.13377
ENSG00000133895.14	MEN1	2.00845	0.044595	0.006709	2	2	2	0.071483	0.1752
ENSG00000114771.13	AADAC	-2.00782	0.044663	0.098538	2	2	2	0.054401	0.567857
ENSG00000173889.15	PHC3	2.00778	0.044666	0.000529	1	1	1	0.044666	0.046414
ENSG00000183828.14	NUDT14	-2.00775	0.04467	0.127679	2	2	2	0.056294	0.284536
ENSG00000146909.7	NOM1	-2.00736	0.044711	0.005772	2	2	2	0.05018	0.106195
ENSG00000168671.9	UGT3A2	-2.00639	0.044815	0.037069	3	3	3	0.006513	0.416632
ENSG00000152749.7	GPR180	-2.00638	0.044816	0.976385	2	2	2	0.041481	0.69907
ENSG00000157933.9	SKI	-2.00637	0.044817	7.44e-05	1	1	1	0.044817	0.013726
ENSG00000175414.6	ARL10	-2.00606	0.04485	0.002234	1	1	1	0.04485	0.091159
ENSG00000079332.14	SAR1A	-2.00598	0.044858	0.038234	2	3	3	0.060181	0.260017
ENSG00000038382.18	TRIO	2.00428	0.04504	0.003993	1	1	1	0.04504	0.092549
ENSG00000268182.5	SMIM17	2.00405	0.045065	0.010025	2	2	2	0.043899	0.176543
ENSG00000120029.12	C10orf76	-2.00197	0.045288	0.006129	2	2	2	0.070507	0.168176
ENSG00000163820.14	FYCO1	-2.00117	0.045374	0.056046	3	3	3	0.010749	0.266045
ENSG00000273384.1	RP5-1098D14.1	-2.00025	0.045474	3e-05	1	1	1	0.045474	0.009526
ENSG00000145012.13	LPP	1.9986	0.045652	0.002513	1	1	1	0.045652	0.07845
ENSG00000148399.12	DPH7	-1.99846	0.045667	0.013505	1	1	1	0.045667	0.20466
ENSG00000246379.6	RP11-461O7.1	1.99676	0.045852	0.000309	2	2	2	0.130872	0.072341
ENSG00000006125.17	AP2B1	-1.99591	0.045944	0.009073	2	2	2	0.010825	0.34405
ENSG00000166801.15	FAM111A	-1.99503	0.046039	0.008671	1	1	1	0.046039	0.243848
ENSG00000100612.13	DHRS7	-1.99465	0.046081	0.024118	2	2	2	0.000125	0.243464
ENSG00000178201.4	VN1R1	-1.99452	0.046095	0.260527	3	3	3	0.08131	0.400681
ENSG00000164418.19	GRIK2	1.99443	0.046105	0.103745	2	2	2	0.016906	0.790274
ENSG00000215845.10	TSTD1	-1.99441	0.046107	0.024771	2	2	2	0.033928	0.242313
ENSG00000141469.16	SLC14A1	1.99291	0.046272	0.012012	2	2	2	0.0077	0.202668
ENSG00000177508.11	IRX3	1.99283	0.046281	0.000101	1	1	1	0.046281	0.043735
ENSG00000271743.1	CTD-2541M15.3	1.99253	0.046313	0.019401	1	2	2	0.046313	0.487747
ENSG00000112619.7	PRPH2	-1.9904	0.046547	0.222814	2	2	2	0.042078	0.644092
ENSG00000188886.3	ASTL	-1.98975	0.046619	3.02e-05	1	1	1	0.046619	0.018288
ENSG00000169756.16	LIMS1	-1.98802	0.046809	6.84e-06	1	2	2	0.046809	0.01655
ENSG00000135404.11	CD63	1.98771	0.046843	7.02e-08	1	1	1	0.046843	0.00117
ENSG00000188263.10	IL17REL	1.98724	0.046896	0.000943	1	1	1	0.046896	0.052731
ENSG00000114737.15	CISH	-1.98712	0.046909	0.000228	1	1	1	0.046909	0.03335
ENSG00000188511.12	C22orf34	-1.98616	0.047015	0.116839	2	2	2	0.071723	0.419507
ENSG00000266258.1	LINC01909	-1.98582	0.047054	0.018069	2	2	2	0.039792	0.268404
ENSG00000111199.10	TRPV4	-1.98539	0.047101	0.027772	2	2	2	0.020194	0.206928
ENSG00000096092.5	TMEM14A	-1.98508	0.047136	0.001706	1	1	1	0.047136	0.067286
ENSG00000249740.2	OSMR-AS1	-1.98433	0.047219	0.126398	3	3	3	0.002178	0.395667
ENSG00000182901.16	RGS7	-1.9832	0.047345	0.000899	1	1	1	0.047345	0.067989
ENSG00000254415.3	SIGLEC14	-1.98294	0.047374	0.377117	3	3	3	0.023151	0.737777
ENSG00000154227.13	CERS3	1.98241	0.047434	0.002006	2	2	2	0.052424	0.06277
ENSG00000272341.1	RP1-151F17.2	1.97925	0.047788	0.004301	1	1	1	0.047788	0.096962
ENSG00000249917.2	LINC00536	1.97831	0.047894	0.00083	1	1	1	0.047894	0.063812
ENSG00000223443.2	USP17L2	-1.97725	0.048013	0.012117	1	2	2	0.048013	0.189017
ENSG00000170915.8	PAQR8	-1.97627	0.048124	0.041174	4	4	4	0.016904	0.25502
ENSG00000153317.14	ASAP1	-1.9742	0.048359	0.128807	3	3	3	0.078427	0.953732
ENSG00000104341.16	LAPTM4B	1.9742	0.048359	0.030125	2	2	2	0.067122	0.252375
ENSG00000112130.16	RNF8	1.97396	0.048387	0.024026	4	5	5	0.06832	0.251686
ENSG00000067596.10	DHX8	1.97373	0.048412	0.067367	2	2	2	0.095269	0.414619
ENSG00000134809.8	TIMM10	-1.97323	0.048469	0.342488	4	4	4	0.074338	0.63516
ENSG00000177707.10	NECTIN3	-1.97258	0.048543	0.00098	1	1	1	0.048543	0.108316
ENSG00000101680.14	LAMA1	1.9722	0.048586	0.005274	1	2	2	0.048586	0.103923
ENSG00000164136.16	IL15	1.97174	0.048639	0.000472	1	1	1	0.048639	0.108315
ENSG00000125735.10	TNFSF14	1.97068	0.04876	0.004983	3	3	3	0.018833	0.1996
ENSG00000143622.10	RIT1	-1.9696	0.048884	0.05566	1	1	1	0.048884	0.344928
ENSG00000164736.5	SOX17	-1.96939	0.048908	4.14e-05	1	1	1	0.048908	0.012637
ENSG00000101079.20	NDRG3	-1.96886	0.048969	0.014057	2	2	2	7.62e-05	0.453018
ENSG00000174165.7	ZDHHC24	-1.96852	0.049008	0.010941	3	3	3	0.116542	0.392318
ENSG00000175595.14	ERCC4	-1.96844	0.049018	0.003537	2	2	2	0.075008	0.100948
ENSG00000125538.11	IL1B	1.96787	0.049083	0.027928	1	1	1	0.049083	0.259514
ENSG00000132406.11	TMEM128	-1.96419	0.049508	0.072192	3	3	3	0.027727	0.284342
ENSG00000281920.1	RP11-418H16.1	1.96419	0.049509	0.037023	2	2	2	0.003244	0.373436
ENSG00000164611.12	PTTG1	1.96387	0.049545	0.009194	2	2	2	0.005791	0.097925
ENSG00000122254.6	HS3ST2	-1.96305	0.04964	0.003099	1	1	1	0.04964	0.088912
ENSG00000062370.16	ZNF112	1.96296	0.049651	0.018904	2	2	2	0.048083	0.211702
ENSG00000137040.9	RANBP6	1.9628	0.049669	0.000107	1	1	1	0.049669	0.018476
ENSG00000267089.1	CTC-499B15.8	-1.96138	0.049835	0.012377	1	1	1	0.049835	0.165085
ENSG00000068976.13	PYGM	1.96104	0.049874	6.41e-07	1	1	1	0.049874	0.001815
ENSG00000112667.12	DNPH1	1.96084	0.049897	0.04023	1	1	1	0.049897	0.482289
ENSG00000100949.14	RABGGTA	1.96053	0.049934	0.009511	3	3	3	0.05644	0.128523
ENSG00000214546.3	AC087491.2	-1.95997	0.049999	0.041964	2	2	2	0.025374	0.28226

## Sheet: Table S3
Table S3.The significant TWAS analysis results between Skin Sun Exposed Lower leg and melanoma.
gene	gene_name	zscore	pvalue	var_g	n_snps_used	n_snps_in_cov	n_snps_in_model	best_gwas_p	largest_weight
ENSG00000003249.13	DBNDD1	9.18713	4.03e-20	0.20733	6	6	6	8.24e-21	0.676014
ENSG00000101440.9	ASIP	8.30867	9.68e-17	0.041058	1	1	1	9.68e-17	0.529982
ENSG00000099810.18	MTAP	7.78093	7.2e-15	0.132877	3	3	3	6.19e-13	0.288543
ENSG00000198646.13	NCOA6	6.29366	3.1e-10	0.002205	1	1	1	3.1e-10	0.095108
ENSG00000049656.13	CLPTM1L	-6.25382	4.01e-10	0.031564	2	2	2	1.17e-11	0.143028
ENSG00000141013.16	GAS8	5.45019	5.03e-08	0.106663	4	4	4	8.24e-21	0.428736
ENSG00000167523.13	SPATA33	-4.92863	8.28e-07	0.009443	1	2	2	8.28e-07	0.146711
ENSG00000107960.10	STN1	-4.61555	3.92e-06	0.017288	2	2	2	1.18e-07	0.269294
ENSG00000185324.21	CDK10	-4.61457	3.94e-06	0.041498	2	4	4	1.56e-05	0.3727
ENSG00000158792.15	SPATA2L	4.60882	4.05e-06	0.019888	2	2	2	4.44e-06	0.19968
ENSG00000084110.10	HAL	-4.53999	5.63e-06	0.516138	3	3	3	3.99e-06	0.475098
ENSG00000015413.9	DPEP1	-4.18594	2.84e-05	0.002486	1	1	1	2.84e-05	0.072474
ENSG00000149311.18	ATM	3.87768	0.000105	0.000809	1	1	1	0.000105	0.05504
ENSG00000166323.12	C11orf65	-3.8259	0.00013	0.007142	1	1	1	0.00013	0.162514
ENSG00000160685.13	ZBTB7B	-3.78753	0.000152	0.007869	1	1	1	0.000152	0.141598
ENSG00000161277.10	THAP8	-3.7742	0.000161	0.071398	2	2	2	7.91e-05	0.276185
ENSG00000135823.13	STX6	3.75667	0.000172	0.000818	1	1	1	0.000172	0.051379
ENSG00000275784.1	RP5-1125A11.6	3.7544	0.000174	0.042724	1	1	1	0.000174	0.293694
ENSG00000177688.6	SUMO4	-3.7434	0.000182	0.000604	2	2	2	7.54e-05	0.038973
ENSG00000167968.12	DNASE1L2	3.61269	0.000303	0.002019	1	1	1	0.000303	0.200109
ENSG00000137675.4	MMP27	3.58984	0.000331	0.064959	2	2	2	0.00119	0.346054
ENSG00000253309.6	SERPINE3	-3.57582	0.000349	0.001127	2	2	2	0.000497	0.174623
ENSG00000163354.14	DCST2	3.50506	0.000457	0.015298	3	3	3	0.000681	0.156276
ENSG00000143537.13	ADAM15	-3.41114	0.000647	0.007567	2	2	2	0.000152	0.113491
ENSG00000163357.10	DCST1	-3.40961	0.000651	0.001604	1	1	1	0.000651	0.053641
ENSG00000164104.11	HMGB2	-3.38715	0.000706	6.14e-05	1	1	1	0.000706	0.033211
ENSG00000139083.10	ETV6	-3.35642	0.00079	0.004023	2	2	2	0.001625	0.085792
ENSG00000055208.18	TAB2	3.34117	0.000834	0.008271	2	2	2	0.000997	0.110951
ENSG00000228127.2	LINC01649	-3.33953	0.000839	0.024788	2	2	2	0.001523	0.260546
ENSG00000180573.9	HIST1H2AC	-3.32684	0.000878	0.001977	1	1	1	0.000878	0.096144
ENSG00000125510.15	OPRL1	-3.3202	0.0009	0.19261	2	2	2	0.001659	0.349945
ENSG00000144476.5	ACKR3	3.31844	0.000905	0.025182	1	1	1	0.000905	0.252389
ENSG00000136770.10	DNAJC1	3.31769	0.000908	3.55e-05	1	1	1	0.000908	0.015981
ENSG00000163710.7	PCOLCE2	-3.30469	0.000951	0.01162	1	1	1	0.000951	0.155369
ENSG00000140968.10	IRF8	3.30092	0.000964	9.53e-07	1	1	1	0.000964	0.003274
ENSG00000153487.12	ING1	3.26793	0.001083	0.002025	1	1	1	0.001083	0.073822
ENSG00000113946.3	CLDN16	3.26213	0.001106	0.61123	4	4	4	0.00019	0.557867
ENSG00000158793.13	NIT1	3.25359	0.00114	0.020455	2	2	2	0.000154	0.572288
ENSG00000155749.12	ALS2CR12	3.22641	0.001254	0.155401	2	2	2	0.003725	0.389047
ENSG00000047617.14	ANO2	3.19458	0.0014	0.013686	2	2	2	0.001711	0.218752
ENSG00000106025.8	TSPAN12	3.19342	0.001406	0.000252	1	1	1	0.001406	0.061015
ENSG00000105270.14	CLIP3	-3.1759	0.001494	0.02139	3	3	3	0.000182	0.230147
ENSG00000100129.17	EIF3L	-3.17586	0.001494	0.048747	2	2	2	0.00132	0.355958
ENSG00000003147.17	ICA1	-3.17472	0.0015	0.010844	2	2	2	0.001642	0.102248
ENSG00000197980.12	LEKR1	3.16746	0.001538	0.163631	3	3	3	9.98e-05	0.556351
ENSG00000173838.11	2025-03-10	-3.1537	0.001612	1.3e-06	1	1	1	0.001612	0.004532
ENSG00000122034.14	GTF3A	-3.15332	0.001614	0.034296	3	3	3	0.004201	0.210344
ENSG00000203867.7	RBM20	3.14861	0.00164	0.002941	2	2	2	0.000608	0.084317
ENSG00000163694.14	RBM47	-3.144	0.001667	0.000878	1	1	1	0.001667	0.051745
ENSG00000187242.4	KRT12	3.13781	0.001702	5.61e-09	2	2	2	0.041499	0.000142
ENSG00000175324.9	LSM1	3.10878	0.001879	0.001938	1	1	1	0.001879	0.072548
ENSG00000156735.10	BAG4	-3.10878	0.001879	0.000301	1	2	2	0.001879	0.028581
ENSG00000012223.12	LTF	-3.09965	0.001937	0.047619	1	1	1	0.001937	0.320353
ENSG00000158786.4	PLA2G2F	-3.08388	0.002043	0.017484	3	3	3	0.005276	0.206251
ENSG00000155729.12	KCTD18	-3.07978	0.002072	0.00172	1	1	1	0.002072	0.111769
ENSG00000166436.15	TRIM66	3.04989	0.002289	0.387915	3	3	3	0.002238	0.658216
ENSG00000187474.4	FPR3	3.03884	0.002375	0.022217	2	2	2	0.008054	0.151609
ENSG00000215717.5	TMEM167B	-3.03379	0.002415	0.001987	1	1	1	0.002415	0.112145
ENSG00000120029.12	C10orf76	-3.02814	0.002461	0.010874	3	3	3	0.00165	0.175219
ENSG00000164512.17	ANKRD55	3.02592	0.002479	0.000201	1	1	1	0.002479	0.05457
ENSG00000171700.13	RGS19	-3.02451	0.00249	0.554632	2	2	2	0.001659	0.656993
ENSG00000227036.6	LINC00511	-3.00514	0.002655	0.000334	1	1	1	0.002655	0.058039
ENSG00000176956.12	LY6H	2.99892	0.002709	0.017073	2	2	2	0.002565	0.29124
ENSG00000109586.11	GALNT7	2.97393	0.00294	0.000467	2	2	2	0.002026	0.099308
ENSG00000115170.13	ACVR1	-2.97135	0.002965	9.87e-07	1	1	1	0.002965	0.00421
ENSG00000188786.9	MTF1	2.96512	0.003026	0.014538	3	3	3	0.003647	0.123164
ENSG00000171060.10	C8orf74	2.96224	0.003054	0.010967	1	1	1	0.003054	0.221579
ENSG00000153820.12	SPHKAP	2.96208	0.003056	0.022127	2	2	2	0.00273	0.148458
ENSG00000183971.6	NPW	2.93616	0.003323	0.002029	2	2	2	0.003732	0.083417
ENSG00000145730.20	PAM	2.92602	0.003433	0.005992	1	1	1	0.003433	0.121676
ENSG00000078814.15	MYH7B	-2.92209	0.003477	0.033615	3	3	3	0.001678	0.227053
ENSG00000163535.17	SGO2	2.91813	0.003521	0.004513	1	1	1	0.003521	0.18106
ENSG00000153879.8	CEBPG	2.91368	0.003572	0.021788	2	2	2	0.00371	0.251505
ENSG00000153922.10	CHD1	2.90171	0.003711	0.001251	1	1	1	0.003711	0.106596
ENSG00000085788.13	DDHD2	2.89706	0.003767	0.00118	1	1	1	0.003767	0.056599
ENSG00000140479.16	PCSK6	2.89328	0.003812	0.003247	1	1	1	0.003812	0.092839
ENSG00000010282.14	HHATL	2.8835	0.003933	0.25819	3	3	3	0.001233	0.381231
ENSG00000262179.2	RP1-302G2.5	2.88159	0.003957	0.162716	2	2	2	9.22e-05	0.346336
ENSG00000144233.9	AMMECR1L	-2.88143	0.003959	0.006904	1	1	1	0.003959	0.115164
ENSG00000258289.8	CHURC1	-2.87675	0.004018	0.443663	1	1	1	0.004018	1.15417
ENSG00000132321.16	IQCA1	2.87427	0.00405	0.027831	1	1	1	0.00405	0.263214
ENSG00000149256.15	TENM4	-2.87095	0.004092	0.00617	2	2	2	0.006743	0.154225
ENSG00000184445.11	KNTC1	2.85193	0.004345	0.0076	3	3	3	0.0078	0.158742
ENSG00000222011.8	FAM185A	-2.8509	0.00436	0.003104	1	1	1	0.00436	0.154226
ENSG00000101407.12	TTI1	-2.85085	0.00436	0.007306	1	2	2	0.00436	0.169888
ENSG00000170175.10	CHRNB1	-2.84967	0.004376	0.096042	3	3	3	0.001633	0.461153
ENSG00000204060.6	FOXO6	-2.84491	0.004442	7.88e-05	1	1	1	0.004442	0.03704
ENSG00000078403.16	MLLT10	-2.83876	0.004529	0.00475	1	1	1	0.004529	0.098313
ENSG00000220205.8	VAMP2	2.83341	0.004605	0.00105	3	4	4	0.0038	0.049286
ENSG00000181649.5	PHLDA2	-2.83154	0.004632	0.00356	1	1	1	0.004632	0.107767
ENSG00000187097.12	ENTPD5	-2.82797	0.004684	0.05546	4	4	4	0.036044	0.220767
ENSG00000170430.9	MGMT	2.82571	0.004718	0.625426	4	4	4	0.001074	0.989896
ENSG00000272335.1	RP11-53O19.3	2.8232	0.004755	0.020799	2	2	2	0.005459	0.211355
ENSG00000270750.1	RP11-461L13.3	2.82	0.004802	0.00028	1	1	1	0.004802	0.095635
ENSG00000178878.12	APOLD1	2.81625	0.004859	0.000222	1	1	1	0.004859	0.023295
ENSG00000092758.15	COL9A3	2.81532	0.004873	0.013239	2	3	3	0.007156	0.183377
ENSG00000010610.9	CD4	-2.81434	0.004888	0.023172	2	2	2	0.00536	0.137744
ENSG00000168928.12	CTRB2	2.81064	0.004944	4.04e-07	1	1	1	0.004944	0.002613
ENSG00000179933.5	C14orf119	2.81027	0.00495	7.68e-05	2	2	2	0.057438	0.040572
ENSG00000175773.12	RP11-121M22.1	-2.78885	0.00529	0.038848	2	2	2	0.005423	0.277829
ENSG00000181631.6	P2RY13	-2.78851	0.005295	0.00019	1	1	1	0.005295	0.076255
ENSG00000260588.1	RP11-930P14.2	2.78811	0.005302	0.008997	2	2	2	0.004405	0.183117
ENSG00000168036.16	CTNNB1	-2.78676	0.005324	0.004308	1	1	1	0.005324	0.091413
ENSG00000117091.9	CD48	2.78248	0.005395	0.000941	2	2	2	0.012055	0.101842
ENSG00000162601.9	MYSM1	2.78152	0.00541	0.001726	1	1	1	0.00541	0.085686
ENSG00000164609.9	SLU7	2.78105	0.005418	0.033025	3	3	3	0.00153	0.309626
ENSG00000172785.18	CBWD1	-2.77627	0.005499	0.334912	1	4	4	0.005499	0.815313
ENSG00000168026.18	TTC21A	-2.76934	0.005617	0.053325	3	3	3	0.00223	0.40063
ENSG00000240875.5	LINC00886	-2.76464	0.005698	0.327974	5	5	5	3.77e-05	1.00212
ENSG00000125967.16	NECAB3	2.74982	0.005963	0.000991	1	1	1	0.005963	0.047078
ENSG00000174606.13	ANGEL2	2.74838	0.005989	0.143636	3	3	3	0.012902	0.422146
ENSG00000197776.7	KLHDC1	-2.74484	0.006054	0.005446	1	1	1	0.006054	0.115693
ENSG00000143612.19	C1orf43	-2.74399	0.00607	0.009766	1	1	1	0.00607	0.13835
ENSG00000277767.1	RP11-365P13.5	-2.74061	0.006133	0.176984	1	1	1	0.006133	0.608778
ENSG00000077232.17	DNAJC10	2.74026	0.006139	0.000263	1	1	1	0.006139	0.09015
ENSG00000197417.7	SHPK	2.73851	0.006172	0.115336	4	4	4	0.022399	0.452157
ENSG00000113248.5	PCDHB15	2.73718	0.006197	0.055858	2	2	2	0.011654	0.582596
ENSG00000255247.1	CTD-2523D13.1	2.73254	0.006285	1.58e-05	1	1	1	0.006285	0.00566
ENSG00000145604.15	SKP2	-2.73087	0.006317	0.007659	1	2	2	0.006317	0.20558
ENSG00000149090.11	PAMR1	-2.72958	0.006342	0.006082	1	1	1	0.006342	0.160578
ENSG00000113719.15	ERGIC1	2.72782	0.006376	0.022181	3	3	3	0.02471	0.189556
ENSG00000101464.10	PIGU	-2.72611	0.006408	0.001978	1	1	1	0.006408	0.062481
ENSG00000185614.4	FAM212A	-2.72535	0.006423	0.019955	2	2	2	0.012638	0.198831
ENSG00000273760.1	CH17-360D5.3	-2.72266	0.006476	0.037633	1	7	7	0.006476	0.63952
ENSG00000170801.9	HTRA3	2.71949	0.006538	0.009247	2	2	2	0.01573	0.147098
ENSG00000168356.11	SCN11A	2.71562	0.006615	0.060512	2	2	2	0.005466	0.462065
ENSG00000127561.14	SYNGR3	2.71222	0.006684	0.019593	2	2	2	0.00686	0.211738
ENSG00000162664.16	ZNF326	2.71107	0.006707	0.000155	1	1	1	0.006707	0.051253
ENSG00000102763.17	VWA8	2.70688	0.006792	0.018685	2	2	2	0.021584	0.186545
ENSG00000119772.16	DNMT3A	2.70634	0.006803	7.76e-07	1	1	1	0.006803	0.002405
ENSG00000163590.13	PPM1L	-2.70577	0.006815	2.67e-08	1	1	1	0.006815	0.000561
ENSG00000064042.17	LIMCH1	2.6999	0.006936	0.066278	4	4	4	0.000445	0.267529
ENSG00000167904.14	TMEM68	-2.69889	0.006957	0.001941	2	2	2	0.018069	0.095349
ENSG00000162817.6	C1orf115	-2.69867	0.006962	0.017617	2	2	2	0.005391	0.127476
ENSG00000175691.8	ZNF77	-2.69409	0.007058	0.126139	2	2	2	0.006424	1.16992
ENSG00000147548.16	NSD3	-2.69364	0.007068	0.001034	1	1	1	0.007068	0.052703
ENSG00000272092.1	RP11-350N15.5	-2.69364	0.007068	0.005904	1	1	1	0.007068	0.125955
ENSG00000149231.11	CCDC82	-2.69265	0.007089	0.813091	3	3	3	0.009595	1.01668
ENSG00000109103.11	UNC119	-2.68807	0.007187	0.003368	1	1	1	0.007187	0.101853
ENSG00000091656.15	ZFHX4	-2.68476	0.007258	0.002374	1	1	1	0.007258	0.098511
ENSG00000160213.6	CSTB	2.68176	0.007324	0.25849	4	4	4	0.010374	0.422088
ENSG00000131899.10	LLGL1	2.68126	0.007335	0.027029	2	2	2	0.015171	0.217029
ENSG00000163393.12	SLC22A15	-2.67971	0.007369	0.011038	2	2	2	0.004983	0.129897
ENSG00000126254.11	RBM42	-2.67788	0.007409	0.001397	2	2	2	0.016733	0.070976
ENSG00000198734.10	F5	-2.67689	0.007431	0.032961	3	3	3	0.007071	0.208089
ENSG00000175414.6	ARL10	-2.67501	0.007473	0.004271	2	2	2	0.023267	0.164077
ENSG00000185946.15	RNPC3	-2.67415	0.007492	0.00409	2	2	2	0.013841	0.103513
ENSG00000149506.11	ZP1	2.6723	0.007533	4.1e-06	1	1	1	0.007533	0.009902
ENSG00000213047.12	DENND1B	-2.6714	0.007553	0.017416	2	2	2	0.010061	0.128863
ENSG00000267454.5	ZNF582-AS1	2.66729	0.007647	0.075722	2	2	2	0.00764	0.386995
ENSG00000127022.14	CANX	2.6672	0.007649	9.9e-05	1	2	2	0.007649	0.020538
ENSG00000172456.17	FGGY	2.6644	0.007713	0.00087	1	2	2	0.007713	0.064579
ENSG00000173272.15	MZT2A	-2.66204	0.007767	0.24885	2	3	3	0.046783	0.905996
ENSG00000111011.17	RSRC2	2.66061	0.0078	4.35e-06	1	1	1	0.0078	0.005188
ENSG00000109320.11	NFKB1	2.65372	0.007961	3.76e-05	1	1	1	0.007961	0.03229
ENSG00000120645.11	IQSEC3	2.65169	0.008009	0.177328	2	2	2	0.012913	0.518535
ENSG00000182858.13	ALG12	-2.64483	0.008173	0.02422	1	1	1	0.008173	0.281147
ENSG00000187527.10	ATP13A5	2.6445	0.008181	0.002307	2	2	2	0.002902	0.083236
ENSG00000147535.16	PLPP5	2.64382	0.008198	0.010395	1	1	1	0.008198	0.168137
ENSG00000136986.9	DERL1	2.64352	0.008205	0.004012	2	2	2	0.001896	0.224414
ENSG00000127554.12	GFER	-2.64043	0.00828	0.058638	1	1	1	0.00828	0.447944
ENSG00000206075.13	SERPINB5	2.63842	0.008329	0.045169	3	3	3	0.012275	0.145406
ENSG00000145996.11	CDKAL1	2.63652	0.008376	0.032765	3	3	3	0.009455	0.2891
ENSG00000166321.13	NUDT13	-2.63511	0.008411	0.49154	2	2	2	0.008516	1.16443
ENSG00000154639.18	CXADR	-2.6347	0.008421	0.007207	3	3	3	0.01179	0.111222
ENSG00000160209.18	PDXK	2.63461	0.008424	0.006883	2	2	2	0.009268	0.15613
ENSG00000128604.19	IRF5	-2.63431	0.008431	0.054726	1	1	1	0.008431	0.327011
ENSG00000070526.14	ST6GALNAC1	-2.63247	0.008477	0.006959	2	2	2	0.013871	0.112004
ENSG00000158106.13	RHPN1	2.63191	0.008491	0.209825	4	4	4	0.003307	0.466787
ENSG00000167118.10	URM1	2.62938	0.008554	0.014001	3	3	3	0.013941	0.281763
ENSG00000111605.16	CPSF6	2.62522	0.008659	0.000893	1	2	2	0.008659	0.057774
ENSG00000150961.14	SEC24D	-2.62422	0.008685	0.006299	1	2	2	0.008685	0.259369
ENSG00000170260.8	ZNF212	2.62235	0.008732	0.045859	3	3	3	0.008556	0.263611
ENSG00000175315.2	CST6	2.61608	0.008895	0.02601	3	3	3	0.021237	0.305233
ENSG00000152583.12	SPARCL1	2.61425	0.008942	0.031521	2	2	2	0.016313	0.181997
ENSG00000132530.16	XAF1	2.61191	0.009004	0.000305	2	2	2	0.007889	0.041858
ENSG00000138286.14	FAM149B1	2.61041	0.009043	0.008213	1	1	1	0.009043	0.29618
ENSG00000161265.14	U2AF1L4	2.60894	0.009082	0.133851	4	4	4	0.023688	0.589989
ENSG00000065485.19	PDIA5	-2.5987	0.009358	3.73e-07	1	1	1	0.009358	0.000963
ENSG00000074706.13	IPCEF1	-2.59866	0.009359	0.049103	2	2	2	0.011594	0.307444
ENSG00000075415.12	SLC25A3	-2.59839	0.009366	0.015513	2	2	2	0.009408	0.37432
ENSG00000175376.8	EIF1AD	2.59774	0.009384	0.049514	3	3	3	0.010335	0.185127
ENSG00000170502.12	NUDT9	-2.59259	0.009526	0.010981	1	1	1	0.009526	0.213888
ENSG00000113845.9	TIMMDC1	-2.59169	0.009551	0.006014	3	3	3	0.043201	0.254218
ENSG00000147459.17	DOCK5	2.58785	0.009658	0.065464	3	3	3	0.007448	0.321987
ENSG00000112812.15	PRSS16	2.5876	0.009665	0.026122	2	2	2	0.013914	0.299018
ENSG00000268471.6	DKFZP434I0714	-2.581	0.009852	3.65e-06	1	1	1	0.009852	0.010927
ENSG00000109670.13	FBXW7	2.581	0.009852	3.41e-05	1	1	1	0.009852	0.03339
ENSG00000165209.18	STRBP	2.57881	0.009914	0.019435	2	2	2	0.033443	0.271291
ENSG00000084463.7	WBP11	2.57593	0.009997	0.003621	2	2	2	0.008322	0.078507
ENSG00000115415.18	STAT1	2.57258	0.010094	0.001741	1	1	1	0.010094	0.061459
ENSG00000260193.1	RP11-83N9.5	-2.57256	0.010095	0.053088	2	2	2	0.006248	0.399599
ENSG00000122884.12	P4HA1	2.5702	0.010164	5.98e-05	1	1	1	0.010164	0.023938
ENSG00000158815.10	FGF17	2.56794	0.010231	0.022752	1	1	1	0.010231	0.223315
ENSG00000056097.15	ZFR	-2.56412	0.010344	0.001344	2	2	2	0.009164	0.083312
ENSG00000214900.9	LINC01588	2.56135	0.010426	0.016904	2	2	2	0.006913	0.173344
ENSG00000130707.17	ASS1	2.55813	0.010524	0.029755	2	2	2	0.018532	0.371829
ENSG00000172987.12	HPSE2	2.55685	0.010562	0.026198	2	2	2	0.010347	0.225928
ENSG00000224853.1	LINC00393	-2.55597	0.010589	0.001677	1	1	1	0.010589	0.115988
ENSG00000106070.17	GRB10	-2.5552	0.010613	0.000236	1	1	1	0.010613	0.025591
ENSG00000164068.15	RNF123	-2.55448	0.010635	0.00943	1	2	2	0.010635	0.14058
ENSG00000168092.13	PAFAH1B2	-2.55352	0.010664	0.001164	1	1	1	0.010664	0.144615
ENSG00000170160.17	CCDC144A	-2.55331	0.010671	0.082908	2	5	5	0.008114	0.812321
ENSG00000162298.18	SYVN1	2.55241	0.010698	0.007159	3	3	3	0.003096	0.095458
ENSG00000091879.13	ANGPT2	-2.55145	0.010728	2.07e-05	1	1	1	0.010728	0.011963
ENSG00000164488.11	DACT2	2.55003	0.010771	0.029427	4	4	4	0.025477	0.336207
ENSG00000108883.12	EFTUD2	2.54886	0.010808	0.002856	2	2	2	0.01059	0.078201
ENSG00000196182.10	STK40	2.54777	0.010842	0.000948	1	1	1	0.010842	0.063774
ENSG00000263004.1	RP11-166P13.3	-2.54735	0.010855	0.153901	5	5	5	0.000536	0.342047
ENSG00000172403.10	SYNPO2	-2.54563	0.010908	0.000186	2	2	2	0.010311	0.044563
ENSG00000169605.5	GKN1	2.54144	0.01104	1.53e-05	1	1	1	0.01104	0.005803
ENSG00000172262.11	ZNF131	-2.53866	0.011128	0.002235	2	2	2	0.030663	0.089605
ENSG00000178773.14	CPNE7	-2.53234	0.01133	0.081048	3	3	3	0.000679	0.474163
ENSG00000173110.7	HSPA6	-2.53127	0.011365	0.006302	1	1	1	0.011365	0.114095
ENSG00000159110.19	IFNAR2	-2.53002	0.011406	0.120582	4	5	5	0.013022	0.657777
ENSG00000143569.18	UBAP2L	-2.52723	0.011497	5.45e-07	1	1	1	0.011497	0.002383
ENSG00000130508.10	PXDN	2.52639	0.011524	0.014435	2	2	2	0.001004	0.106845
ENSG00000105778.18	AVL9	-2.52497	0.011571	0.01523	2	2	2	0.010588	0.133415
ENSG00000197208.5	SLC22A4	-2.52312	0.011632	0.013918	2	2	2	0.010855	0.162059
ENSG00000233539.5	AC011294.3	2.52188	0.011673	0.012816	1	1	1	0.011673	0.208643
ENSG00000081791.8	KIAA0141	-2.52088	0.011706	0.013812	3	3	3	0.013718	0.151121
ENSG00000109944.10	C11orf63	-2.52084	0.011708	0.022928	2	2	2	0.009128	0.506494
ENSG00000130810.19	PPAN	-2.51992	0.011738	0.001899	3	3	3	3.95e-05	0.14503
ENSG00000165188.13	RNF183	-2.51952	0.011752	0.05785	1	1	1	0.011752	0.344687
ENSG00000157593.18	SLC35B2	2.51836	0.01179	0.001909	1	1	1	0.01179	0.07393
ENSG00000145220.13	LYAR	2.51387	0.011942	0.019003	2	2	2	0.002321	0.134905
ENSG00000069974.15	RAB27A	-2.51088	0.012043	0.009466	2	2	2	0.00271	0.238069
ENSG00000085274.15	MYNN	-2.51081	0.012046	0.000329	1	1	1	0.012046	0.058362
ENSG00000198556.13	ZNF789	-2.5077	0.012152	0.000477	2	2	2	0.045539	0.053515
ENSG00000262468.5	LINC01569	-2.50483	0.012251	0.05396	2	2	2	0.018192	0.25943
ENSG00000114988.11	LMAN2L	2.503	0.012315	0.02084	2	2	2	0.022113	0.180774
ENSG00000095319.14	NUP188	-2.50229	0.012339	0.002052	2	2	2	0.050727	0.089229
ENSG00000072818.11	ACAP1	2.50173	0.012359	0.005359	1	1	1	0.012359	0.120106
ENSG00000170270.4	GON7	2.49411	0.012627	0.002092	1	2	2	0.012627	0.211253
ENSG00000254415.3	SIGLEC14	-2.49076	0.012747	0.45965	3	3	3	0.023151	0.769139
ENSG00000074800.13	ENO1	-2.49014	0.012769	0.002759	1	1	1	0.012769	0.09741
ENSG00000120889.12	TNFRSF10B	2.48767	0.012858	0.008961	1	1	1	0.012858	0.132543
ENSG00000085491.15	SLC25A24	2.48718	0.012876	0.21149	2	3	3	0.011615	0.443482
ENSG00000126262.4	FFAR2	-2.48716	0.012877	8.83e-05	1	2	2	0.012877	0.013862
ENSG00000148343.18	MIGA2	-2.48631	0.012908	0.001061	2	2	2	0.035042	0.087106
ENSG00000125779.21	PANK2	-2.48515	0.01295	0.033388	2	2	2	0.012459	0.535049
ENSG00000137414.5	FAM8A1	-2.48307	0.013026	0.01386	1	1	1	0.013026	0.184798
ENSG00000220161.4	LINC02076	-2.48154	0.013082	0.004854	1	2	2	0.013082	0.249014
ENSG00000251396.6	LINC01301	2.47812	0.013208	0.032562	1	1	1	0.013208	0.265949
ENSG00000215252.11	GOLGA8B	-2.47719	0.013242	0.12166	2	3	3	0.044647	1.27408
ENSG00000157570.11	TSPAN18	2.47692	0.013252	0.011403	2	2	2	0.023652	0.151407
ENSG00000229676.2	ZNF492	-2.47565	0.013299	0.169749	2	2	2	0.015795	0.645085
ENSG00000125148.6	MT2A	2.47221	0.013428	0.001586	1	1	1	0.013428	0.060915
ENSG00000136908.17	DPM2	2.4634	0.013763	0.017296	1	1	1	0.013763	0.291826
ENSG00000138279.15	ANXA7	2.46063	0.013869	0.000702	1	1	1	0.013869	0.082602
ENSG00000277972.1	CISD3	2.46055	0.013873	0.015719	2	2	2	0.012841	0.196054
ENSG00000197766.7	CFD	-2.4573	0.013999	0.004466	2	2	2	0.031933	0.163757
ENSG00000165804.15	ZNF219	-2.45673	0.014021	0.007061	2	2	2	0.008731	0.105483
ENSG00000139970.16	RTN1	2.45547	0.01407	0.043714	2	2	2	0.012918	0.302869
ENSG00000245017.2	RP11-181C3.1	2.45439	0.014112	0.010447	2	2	2	0.012924	0.153531
ENSG00000147689.16	FAM83A	2.45085	0.014252	0.012954	2	2	2	0.038888	0.170308
ENSG00000100271.16	TTLL1	2.45084	0.014252	0.023257	3	3	3	0.019904	0.211344
ENSG00000107897.18	ACBD5	-2.44968	0.014298	5.04e-05	1	1	1	0.014298	0.028788
ENSG00000156042.17	CFAP70	-2.44924	0.014316	0.10355	2	2	2	0.012988	0.548977
ENSG00000177225.16	PDDC1	-2.44803	0.014364	0.011499	1	1	1	0.014364	0.159614
ENSG00000151575.14	TEX9	2.44797	0.014366	0.096704	2	2	2	0.027342	0.425676
ENSG00000108244.16	KRT23	-2.44705	0.014403	0.000269	1	1	1	0.014403	0.030145
ENSG00000082701.14	GSK3B	2.4465	0.014425	0.007163	1	1	1	0.014425	0.1235
ENSG00000253959.1	LINC01863	-2.44515	0.014479	0.014392	2	2	2	0.054886	0.188102
ENSG00000187566.5	NHLRC1	2.44411	0.014521	0.024924	2	2	2	0.026026	0.648146
ENSG00000076650.6	GPATCH1	-2.44193	0.014609	0.039935	2	2	2	0.005884	0.188829
ENSG00000165457.13	FOLR2	2.44098	0.014648	0.000442	1	1	1	0.014648	0.074812
ENSG00000171222.10	SCAND1	-2.44031	0.014675	0.002258	3	3	3	0.008114	0.10493
ENSG00000151458.11	ANKRD50	2.43833	0.014755	0.025568	3	3	3	0.004542	0.22197
ENSG00000178297.12	TMPRSS9	2.43833	0.014755	0.164083	3	3	3	0.01136	0.723896
ENSG00000168070.11	MAJIN	-2.43575	0.014861	0.001068	2	2	2	0.016527	0.106186
ENSG00000078246.16	TULP3	-2.43555	0.014869	0.088851	2	2	2	0.032822	0.455924
ENSG00000224470.7	ATXN1L	2.43457	0.01491	0.000138	2	2	2	0.013698	0.028705
ENSG00000179715.12	PCED1B	-2.43417	0.014926	0.008369	2	2	2	0.041168	0.112013
ENSG00000169169.14	CPT1C	2.43003	0.015098	0.022181	2	2	2	0.021063	0.393244
ENSG00000153896.17	ZNF599	-2.4233	0.01538	0.012223	1	1	1	0.01538	0.582102
ENSG00000137699.16	TRIM29	2.42127	0.015466	0.000604	1	1	1	0.015466	0.13277
ENSG00000159648.11	TEPP	-2.41972	0.015532	0.149213	2	2	2	0.014143	0.75941
ENSG00000135929.8	CYP27A1	2.41803	0.015605	0.001763	1	1	1	0.015605	0.061998
ENSG00000113558.18	SKP1	-2.4179	0.01561	0.005253	3	3	3	0.014853	0.16957
ENSG00000116237.15	ICMT	-2.41628	0.01568	0.068847	3	4	4	0.008315	0.642638
ENSG00000047188.15	YTHDC2	-2.4156	0.015709	0.037712	2	2	2	0.012938	0.178656
ENSG00000078699.21	CBFA2T2	-2.4152	0.015727	0.00458	2	2	2	0.007696	0.106211
ENSG00000120699.12	EXOSC8	-2.41423	0.015769	0.002591	1	1	1	0.015769	0.107005
ENSG00000125998.7	FAM83C	2.41407	0.015775	0.041228	2	2	2	0.00174	0.225033
ENSG00000176171.11	BNIP3	-2.41305	0.01582	0.035112	2	2	2	0.025865	0.275749
ENSG00000133606.10	MKRN1	-2.41143	0.01589	0.00078	1	1	1	0.01589	0.068421
ENSG00000244752.2	CRYBB2	2.40897	0.015998	0.130095	3	3	3	0.027727	0.537312
ENSG00000204682.5	CASC10	2.40801	0.01604	0.00763	2	2	2	0.016887	0.12527
ENSG00000241163.7	LINC00877	2.40647	0.016108	0.002175	1	1	1	0.016108	0.072548
ENSG00000163728.10	TTC14	-2.40204	0.016304	0.003514	1	1	1	0.016304	0.142199
ENSG00000188343.12	FAM92A	-2.4013	0.016337	3.5e-05	1	1	1	0.016337	0.00902
ENSG00000118181.10	RPS25	-2.40074	0.016362	0.001965	1	1	1	0.016362	0.070825
ENSG00000010626.14	LRRC23	-2.4006	0.016368	1.03892	2	2	2	0.006971	0.868962
ENSG00000221818.8	EBF2	2.39893	0.016443	0.001166	1	1	1	0.016443	0.067825
ENSG00000104067.16	TJP1	-2.3989	0.016444	5.15e-05	1	1	1	0.016444	0.032546
ENSG00000089157.15	RPLP0	2.39804	0.016483	6.92e-05	1	1	1	0.016483	0.028284
ENSG00000197081.12	IGF2R	-2.398	0.016485	0.008568	1	1	1	0.016485	0.213154
ENSG00000120053.10	GOT1	2.39793	0.016488	0.000245	1	1	1	0.016488	0.044369
ENSG00000143420.18	ENSA	2.39762	0.016502	0.000251	1	1	1	0.016502	0.022146
ENSG00000178538.9	CA8	-2.39745	0.016509	0.010995	1	1	1	0.016509	0.154765
ENSG00000153094.22	BCL2L11	-2.39615	0.016568	0.008249	2	2	2	0.009634	0.200748
ENSG00000236780.5	LINC01829	-2.39573	0.016587	0.067222	2	2	2	0.016567	0.38732
ENSG00000273100.1	RP11-302L19.3	-2.39522	0.01661	0.047634	1	1	1	0.01661	0.362077
ENSG00000082146.12	STRADB	-2.39465	0.016636	8.21e-05	1	1	1	0.016636	0.013442
ENSG00000198380.12	GFPT1	2.39285	0.016718	0.007879	1	1	1	0.016718	0.195427
ENSG00000136104.19	RNASEH2B	2.39269	0.016725	0.196809	2	2	2	0.026445	1.59062
ENSG00000257698.1	RP11-620J15.3	2.39153	0.016778	0.008793	2	2	2	0.017245	0.145925
ENSG00000160404.17	TOR2A	2.39038	0.016831	0.000111	1	2	2	0.016831	0.045453
ENSG00000105982.16	RNF32	2.39027	0.016836	0.043877	4	4	4	0.03607	0.181049
ENSG00000057019.15	DCBLD2	-2.39	0.016848	0.074903	3	3	3	0.005498	0.768003
ENSG00000033627.16	ATP6V0A1	2.38881	0.016903	0.000855	2	2	2	0.020759	0.049937
ENSG00000164418.19	GRIK2	2.38875	0.016906	0.090715	1	1	1	0.016906	0.717094
ENSG00000054118.13	THRAP3	-2.38739	0.016968	0.008049	1	1	1	0.016968	0.189452
ENSG00000135736.5	CCDC102A	-2.38544	0.017059	0.044286	3	3	3	0.052045	0.562389
ENSG00000226979.8	LTA	-2.38526	0.017067	0.007342	1	1	1	0.017067	0.339863
ENSG00000135374.9	ELF5	-2.38484	0.017087	0.011463	1	1	1	0.017087	0.157354
ENSG00000254427.1	RP11-430H10.1	2.38463	0.017096	0.207991	3	3	3	0.025457	0.553029
ENSG00000141485.16	SLC13A5	2.38423	0.017115	0.014267	1	1	1	0.017115	0.172286
ENSG00000100813.14	ACIN1	-2.38167	0.017234	5.54e-06	1	1	1	0.017234	0.006529
ENSG00000090863.11	GLG1	-2.38105	0.017263	0.00594	3	3	3	0.023615	0.10005
ENSG00000214548.14	MEG3	-2.38028	0.0173	2.44e-08	1	1	1	0.0173	0.000536
ENSG00000180066.9	C10orf91	2.37914	0.017353	0.13159	2	2	2	0.013973	2.14213
ENSG00000143799.12	PARP1	2.37885	0.017367	0.009109	2	2	2	0.007095	0.144121
ENSG00000122877.15	EGR2	2.3761	0.017496	0.002618	2	2	2	0.01216	0.125206
ENSG00000143367.15	TUFT1	-2.37451	0.017572	0.00342	2	2	2	0.016588	0.21402
ENSG00000134905.16	CARS2	2.37257	0.017665	0.064017	2	2	2	0.001175	0.344928
ENSG00000188921.13	HACD4	-2.37184	0.0177	0.468675	3	3	3	0.019213	0.601844
ENSG00000118137.9	APOA1	-2.37166	0.017708	0.000141	2	2	2	0.018294	0.046895
ENSG00000177453.7	NIM1K	2.37055	0.017762	0.020641	2	2	2	0.041486	0.321324
ENSG00000109536.11	FRG1	2.36946	0.017814	0.010562	1	1	1	0.017814	0.169606
ENSG00000250934.1	RP11-71E19.1	2.36863	0.017854	0.004626	1	2	2	0.017854	0.117616
ENSG00000230587.1	AC093609.1	2.36783	0.017893	0.020888	2	2	2	0.018553	0.232411
ENSG00000165501.16	LRR1	2.36546	0.018007	0.104086	2	2	2	0.008451	0.300275
ENSG00000158480.10	SPATA2	-2.36518	0.018021	0.101731	2	2	2	0.015405	0.452488
ENSG00000157551.17	KCNJ15	-2.36496	0.018032	0.001906	1	1	1	0.018032	0.05817
ENSG00000101412.12	E2F1	-2.3638	0.018089	9.13e-05	1	1	1	0.018089	0.03674
ENSG00000189060.5	H1F0	-2.36363	0.018097	0.000177	1	1	1	0.018097	0.034789
ENSG00000179935.9	LINC00652	-2.36327	0.018114	0.022161	1	1	1	0.018114	0.268182
ENSG00000187736.12	NHEJ1	2.36322	0.018117	0.004736	2	2	2	0.043347	0.112838
ENSG00000130811.11	EIF3G	-2.3623	0.018162	0.001961	1	1	1	0.018162	0.06261
ENSG00000111863.12	ADTRP	2.35712	0.018417	0.038833	1	1	1	0.018417	0.308323
ENSG00000132376.19	INPP5K	-2.35556	0.018495	0.003703	2	2	2	0.068449	0.17635
ENSG00000152684.10	PELO	2.35243	0.018651	0.061994	3	3	3	0.015188	0.812188
ENSG00000067221.13	STOML1	2.34757	0.018896	0.037361	1	1	1	0.018896	0.286965
ENSG00000162511.7	LAPTM5	-2.34358	0.0191	0.005135	2	2	2	0.013529	0.08336
ENSG00000178734.5	LMO7DN	-2.34103	0.019231	0.0293	1	1	1	0.019231	0.298396
ENSG00000165915.13	SLC39A13	-2.34083	0.019241	0.006431	2	2	2	0.026702	0.166185
ENSG00000099800.7	TIMM13	-2.33956	0.019306	0.045903	4	4	4	0.01136	0.381902
ENSG00000164588.6	HCN1	2.33915	0.019328	0.001189	1	1	1	0.019328	0.051352
ENSG00000170525.19	PFKFB3	-2.339	0.019335	0.000211	2	2	2	0.021185	0.047996
ENSG00000131473.16	ACLY	2.33663	0.019458	0.003294	2	2	2	0.019918	0.109086
ENSG00000116191.17	RALGPS2	-2.3359	0.019496	0.018537	1	1	1	0.019496	0.234866
ENSG00000185621.11	LMLN	-2.33498	0.019544	1.86e-06	2	2	2	0.003159	0.004713
ENSG00000112186.11	CAP2	-2.33275	0.019661	0.000156	1	1	1	0.019661	0.020788
ENSG00000105726.16	ATP13A1	-2.3317	0.019717	0.005236	1	2	2	0.019717	0.184381
ENSG00000182827.8	ACBD3	-2.33063	0.019773	0.010955	2	2	2	0.019843	0.161363
ENSG00000213057.5	C1orf220	-2.33001	0.019805	0.052883	3	3	3	0.015422	0.274544
ENSG00000135913.10	USP37	2.3291	0.019854	0.018391	2	2	2	0.014847	0.184452
ENSG00000120341.18	SEC16B	2.32785	0.01992	0.018713	1	1	1	0.01992	0.256044
ENSG00000170425.3	ADORA2B	-2.32467	0.02009	1.59e-05	1	2	2	0.02009	0.019082
ENSG00000114654.7	EFCC1	-2.32137	0.020267	0.011552	1	2	2	0.020267	0.147249
ENSG00000250303.3	RP11-356J5.12	-2.3203	0.020325	0.001062	1	1	1	0.020325	0.082026
ENSG00000146094.13	DOK3	2.31949	0.020369	0.014301	2	2	2	0.062171	0.345375
ENSG00000267107.6	PCAT19	-2.31948	0.020369	0.071291	1	1	1	0.020369	0.42876
ENSG00000100191.5	SLC5A4	-2.31901	0.020395	0.146057	3	4	4	0.011654	0.722081
ENSG00000068654.15	POLR1A	-2.31866	0.020414	0.09201	2	2	2	0.025532	0.516602
ENSG00000159921.14	GNE	2.31773	0.020464	0.001115	2	2	2	0.021887	0.057706
ENSG00000168961.16	LGALS9	-2.31506	0.02061	0.014253	1	1	1	0.02061	0.195538
ENSG00000165973.18	NELL1	2.31465	0.020632	0.286621	1	1	1	0.020632	0.959388
ENSG00000156453.13	PCDH1	2.31452	0.020639	0.001348	1	1	1	0.020639	0.079009
ENSG00000042286.14	AIFM2	2.31413	0.02066	0.008339	1	2	2	0.02066	0.130958
ENSG00000113384.13	GOLPH3	2.31233	0.020759	0.00222	2	2	2	0.019094	0.259787
ENSG00000176994.10	SMCR8	-2.31218	0.020768	0.000386	1	1	1	0.020768	0.033154
ENSG00000160233.7	LRRC3	-2.31049	0.020861	0.055145	4	4	4	0.018517	0.726928
ENSG00000111640.14	GAPDH	2.31008	0.020884	0.001274	2	2	2	0.010016	0.10344
ENSG00000204866.8	IGFL2	-2.30969	0.020905	0.001551	2	2	2	0.063362	0.126703
ENSG00000241945.7	PWP2	-2.30922	0.020931	1.11292	4	4	4	0.007212	1.52765
ENSG00000196313.11	POM121	2.30863	0.020964	0.173512	2	2	2	0.021235	0.552655
ENSG00000122033.14	MTIF3	2.30767	0.021017	0.012058	2	2	2	0.012643	0.147969
ENSG00000198858.9	R3HDM4	-2.30557	0.021135	0.005338	3	4	4	0.06197	0.081619
ENSG00000117419.14	ERI3	-2.30327	0.021264	6.98e-06	1	1	1	0.021264	0.011933
ENSG00000176399.3	DMRTA1	2.30274	0.021293	0.907319	3	3	3	0.032606	1.16492
ENSG00000086598.10	TMED2	2.29993	0.021452	0.003187	1	1	1	0.021452	0.091054
ENSG00000100403.11	ZC3H7B	2.29985	0.021457	0.000584	1	1	1	0.021457	0.036237
ENSG00000117862.11	TXNDC12	-2.29914	0.021497	0.003877	1	1	1	0.021497	0.197758
ENSG00000204946.9	ZNF783	2.29858	0.021529	0.008531	3	4	4	0.021187	0.196449
ENSG00000068650.18	ATP11A	2.2974	0.021596	0.0104	1	2	2	0.021596	0.174248
ENSG00000233436.7	BTBD18	2.29602	0.021675	0.011558	1	1	1	0.021675	0.180214
ENSG00000137171.14	KLC4	-2.29222	0.021893	0.00454	1	1	1	0.021893	0.254808
ENSG00000121743.3	GJA3	2.29207	0.021902	0.004536	3	3	3	0.081685	0.124022
ENSG00000107295.9	SH3GL2	-2.29182	0.021916	7.12e-05	2	2	2	0.017853	0.043826
ENSG00000221926.11	TRIM16	2.29013	0.022014	0.009826	2	2	2	0.009676	0.107341
ENSG00000164818.15	DNAAF5	-2.2885	0.022108	0.097336	2	2	2	0.016453	0.325427
ENSG00000135976.17	ANKRD36	2.28731	0.022178	0.035739	2	2	2	0.014754	0.228155
ENSG00000165322.17	ARHGAP12	-2.28706	0.022192	0.006054	1	1	1	0.022192	0.111397
ENSG00000099977.13	DDT	-2.28698	0.022197	0.078882	2	2	2	0.055161	0.46803
ENSG00000134508.12	CABLES1	2.28555	0.02228	0.000247	1	2	2	0.02228	0.048608
ENSG00000167920.8	TMEM99	2.2852	0.022301	0.005097	1	1	1	0.022301	0.101515
ENSG00000165502.6	RPL36AL	2.28394	0.022375	0.334949	2	2	2	0.00728	0.608004
ENSG00000141219.15	C17orf80	2.28193	0.022494	0.155574	3	3	3	0.029221	0.349366
ENSG00000175220.11	ARHGAP1	2.27878	0.02268	0.011794	1	1	1	0.02268	0.171891
ENSG00000196814.14	MVB12B	-2.27868	0.022686	0.110909	2	2	2	0.002222	0.329436
ENSG00000122705.16	CLTA	-2.2765	0.022816	0.001849	2	3	3	0.03715	0.09747
ENSG00000180730.4	SHISA2	-2.27599	0.022847	0.000141	1	1	1	0.022847	0.020087
ENSG00000257526.2	RP11-20E24.1	2.27513	0.022898	0.033389	2	2	2	0.027423	0.488869
ENSG00000258279.3	LINC00592	-2.27465	0.022927	0.021519	2	2	2	0.053881	0.243236
ENSG00000170571.11	EMB	2.27418	0.022955	0.103494	3	3	3	0.008363	0.344159
ENSG00000225489.6	RP11-390F4.3	2.27379	0.022979	1.76e-05	1	2	2	0.022979	0.010094
ENSG00000075399.13	VPS9D1	2.27189	0.023093	0.170221	3	3	3	0.008686	0.405094
ENSG00000164778.4	EN2	-2.27129	0.023129	0.035715	2	2	2	0.052502	0.306225
ENSG00000184588.17	PDE4B	2.27058	0.023173	0.005226	2	2	2	0.023154	0.101809
ENSG00000151893.14	CACUL1	2.27045	0.02318	0.028987	2	2	2	0.008794	0.282911
ENSG00000167283.7	ATP5L	-2.27035	0.023186	2.8e-06	1	1	1	0.023186	0.002711
ENSG00000167106.11	FAM102A	2.26985	0.023217	0.038271	2	2	2	0.016683	0.421105
ENSG00000213471.9	TTLL13P	2.26898	0.023269	0.003925	1	1	1	0.023269	0.119873
ENSG00000131730.15	CKMT2	-2.26639	0.023428	0.000742	1	1	1	0.023428	0.123492
ENSG00000181798.2	LINC00471	2.26579	0.023464	0.140504	2	2	2	0.019722	0.625882
ENSG00000134575.9	ACP2	2.26556	0.023478	0.110536	2	2	2	0.033088	0.346157
ENSG00000131686.14	CA6	2.26448	0.023545	0.012148	3	3	3	0.046057	0.166048
ENSG00000254837.2	AP001372.2	2.26304	0.023633	0.000268	1	1	1	0.023633	0.028717
ENSG00000113658.16	SMAD5	-2.26177	0.023712	0.014003	1	1	1	0.023712	0.180555
ENSG00000170775.2	GPR37	-2.25955	0.023849	0.002185	1	1	1	0.023849	0.066421
ENSG00000165084.15	C8orf34	2.25696	0.024011	0.015638	1	1	1	0.024011	0.182488
ENSG00000213551.4	DNAJC9	-2.25687	0.024016	0.018684	1	1	1	0.024016	0.411515
ENSG00000128891.15	C15orf57	2.25638	0.024047	0.977681	3	3	3	0.00889	0.817877
ENSG00000106631.8	MYL7	2.25552	0.024101	0.001145	1	1	1	0.024101	0.108307
ENSG00000165480.15	SKA3	-2.2549	0.02414	0.001725	1	2	2	0.02414	0.095076
ENSG00000115761.15	NOL10	-2.25433	0.024176	0.001242	1	1	1	0.024176	0.126821
ENSG00000105556.11	MIER2	-2.25354	0.024225	0.011104	3	3	3	0.064792	0.133598
ENSG00000165475.13	CRYL1	-2.25243	0.024295	0.066666	3	3	3	0.084474	0.389023
ENSG00000181220.15	ZNF746	-2.25239	0.024298	0.024772	2	2	2	0.017562	0.161801
ENSG00000127831.10	VIL1	2.25132	0.024365	0.000332	1	1	1	0.024365	0.026635
ENSG00000143457.10	GOLPH3L	-2.2508	0.024398	0.330792	1	1	1	0.024398	0.828276
ENSG00000122386.10	ZNF205	2.25032	0.024429	0.006922	1	1	1	0.024429	0.120391
ENSG00000152382.5	TADA1	-2.24968	0.024469	0.126058	3	3	3	0.003111	0.284993
ENSG00000004777.18	ARHGAP33	2.24887	0.024521	0.303601	3	3	3	0.019279	0.414968
ENSG00000088298.12	EDEM2	2.2488	0.024525	0.020721	1	1	1	0.024525	0.240475
ENSG00000257756.5	RP11-776A13.3	-2.24828	0.024558	0.107192	2	2	2	0.048114	0.358095
ENSG00000125735.10	TNFSF14	2.24534	0.024747	0.00495	2	2	2	0.018833	0.206726
ENSG00000107798.17	LIPA	2.24527	0.024751	0.011297	4	4	4	0.001514	0.166987
ENSG00000258768.2	CTD-2292M16.8	2.24403	0.02483	0.068104	3	3	3	0.058918	0.475023
ENSG00000170537.12	TMC7	2.24395	0.024836	0.00103	2	2	2	0.025883	0.047589
ENSG00000112339.14	HBS1L	-2.24324	0.024881	0.075606	2	2	2	0.031982	0.273136
ENSG00000187815.9	ZFP69	2.24255	0.024926	0.332023	3	3	3	0.01571	0.998898
ENSG00000179855.5	GIPC3	-2.24045	0.025061	0.145982	3	3	3	0.016182	0.46312
ENSG00000132718.8	SYT11	-2.2399	0.025097	0.000659	1	2	2	0.025097	0.040038
ENSG00000272369.1	RP11-446N19.1	2.23921	0.025142	0.091144	1	1	1	0.025142	0.468576
ENSG00000038219.12	BOD1L1	2.23816	0.025211	0.02369	1	1	1	0.025211	0.325841
ENSG00000115556.13	PLCD4	2.23812	0.025213	0.00871	1	2	2	0.025213	0.137813
ENSG00000005102.12	MEOX1	2.23624	0.025336	0.027049	1	1	1	0.025336	0.359598
ENSG00000112651.11	MRPL2	-2.23543	0.025389	0.001576	1	1	1	0.025389	0.106767
ENSG00000119899.12	SLC17A5	-2.23519	0.025405	0.005978	1	1	1	0.025405	0.114181
ENSG00000165633.12	VSTM4	-2.23481	0.02543	0.002822	1	1	1	0.02543	0.11197
ENSG00000134574.11	DDB2	-2.23428	0.025465	0.07612	2	2	2	0.010709	0.238287
ENSG00000132300.18	PTCD3	2.23326	0.025532	0.000567	1	1	1	0.025532	0.045836
ENSG00000131018.22	SYNE1	2.23183	0.025626	0.000813	1	1	1	0.025626	0.041364
ENSG00000221886.3	ZBED8	-2.23166	0.025637	0.015096	2	2	2	0.017956	0.117068
ENSG00000144199.11	FAHD2B	2.23145	0.025652	0.015949	1	1	1	0.025652	0.295328
ENSG00000166896.7	ATP23	2.23031	0.025727	0.252547	1	1	1	0.025727	0.785591
ENSG00000257261.5	RP11-96H19.1	2.2292	0.025801	0.284858	1	1	1	0.025801	0.827651
ENSG00000275481.1	RP11-474P2.6	2.2292	0.025801	0.018457	1	1	1	0.025801	0.210677
ENSG00000106236.3	NPTX2	2.22824	0.025864	0.0235	2	2	2	0.024536	0.258098
ENSG00000185813.10	PCYT2	-2.2282	0.025867	0.00156	1	1	1	0.025867	0.185955
ENSG00000182809.10	CRIP2	-2.22776	0.025896	0.000492	1	1	1	0.025896	0.123171
ENSG00000144118.13	RALB	2.22711	0.02594	0.012889	1	1	1	0.02594	0.174232
ENSG00000186470.13	BTN3A2	-2.22697	0.02595	0.417027	3	3	3	0.04082	1.30006
ENSG00000163239.12	TDRD10	2.22507	0.026076	0.009262	2	2	2	0.018458	0.113791
ENSG00000278869.1	CITF22-49E9.3	-2.22323	0.0262	0.216136	4	4	4	0.033657	0.570736
ENSG00000137574.10	TGS1	-2.22294	0.02622	0.0542	1	1	1	0.02622	0.524067
ENSG00000167767.13	KRT80	-2.222	0.026283	0.01297	4	4	4	0.042669	0.149653
ENSG00000197780.9	TAF13	2.22183	0.026295	0.023071	3	3	3	0.013028	0.263586
ENSG00000169439.11	SDC2	-2.22106	0.026347	4e-07	2	2	2	0.203178	0.004115
ENSG00000137628.16	DDX60	-2.22077	0.026366	0.002151	2	2	2	0.023471	0.152
ENSG00000109063.14	MYH3	-2.22007	0.026414	0.001699	2	2	2	0.032824	0.077104
ENSG00000101019.21	UQCC1	2.21803	0.026553	0.059793	2	2	2	0.026099	0.353189
ENSG00000085644.13	ZNF213	-2.21769	0.026576	0.014291	2	2	2	0.024412	0.172396
ENSG00000168288.12	MMADHC	2.21696	0.026626	0.000323	2	2	2	0.024494	0.026536
ENSG00000132763.14	MMACHC	2.21674	0.026641	0.009759	1	2	2	0.026641	0.166647
ENSG00000075884.13	ARHGAP15	-2.21597	0.026694	8.24e-06	1	1	1	0.026694	0.005361
ENSG00000048707.13	VPS13D	-2.21576	0.026708	0.000874	2	2	2	0.034101	0.163769
ENSG00000242247.10	ARFGAP3	-2.21557	0.026721	0.019169	1	1	1	0.026721	0.196494
ENSG00000162613.16	FUBP1	-2.21344	0.026867	0.016888	2	2	2	0.027282	0.291389
ENSG00000105323.16	HNRNPUL1	2.21216	0.026955	0.001286	2	2	2	0.026931	0.113641
ENSG00000111671.9	SPSB2	-2.2089	0.027182	0.399668	3	3	3	0.023014	0.484868
ENSG00000175785.12	PRIMA1	-2.20856	0.027205	0.006211	1	1	1	0.027205	0.174372
ENSG00000128513.14	POT1	2.20856	0.027205	0.012613	2	2	2	0.062185	0.426493
ENSG00000166579.15	NDEL1	2.20825	0.027227	0.000932	2	2	2	0.019606	0.045968
ENSG00000179958.8	DCTPP1	-2.2077	0.027265	0.000397	1	1	1	0.027265	0.033768
ENSG00000198331.10	HYLS1	-2.20721	0.027299	0.002616	1	1	1	0.027299	0.118712
ENSG00000182923.16	CEP63	-2.2059	0.027391	0.110222	2	2	2	0.052559	0.585503
ENSG00000167193.7	CRK	2.2058	0.027398	0.005958	1	1	1	0.027398	0.106625
ENSG00000184144.11	CNTN2	2.20576	0.027401	0.204819	3	3	3	0.007119	0.637467
ENSG00000131944.9	FAAP24	2.20568	0.027406	0.203487	2	2	2	0.004943	0.47368
ENSG00000257556.1	RP11-44N21.1	-2.20373	0.027543	0.005955	1	2	2	0.027543	0.152744
ENSG00000143222.11	UFC1	2.20325	0.027577	0.007653	2	2	2	0.032383	0.401362
ENSG00000109107.13	ALDOC	2.20235	0.02764	0.012145	1	1	1	0.02764	0.168447
ENSG00000087111.20	PIGS	2.20235	0.02764	0.00046	1	2	2	0.02764	0.032799
ENSG00000254636.1	ARMS2	-2.20216	0.027654	0.228873	2	2	2	0.008017	0.819076
ENSG00000168061.14	SAC3D1	-2.19928	0.027858	0.00933	2	2	2	0.032417	0.140019
ENSG00000051128.18	HOMER3	-2.19781	0.027962	0.0094	3	3	3	0.053922	0.290768
ENSG00000187664.8	HAPLN4	-2.19725	0.028002	0.056271	1	1	1	0.028002	0.345717
ENSG00000241360.1	PDXP	-2.19628	0.028072	0.001823	1	1	1	0.028072	0.124724
ENSG00000213995.11	NAXD	-2.19351	0.02827	0.021769	3	3	3	6.78e-05	0.397107
ENSG00000132436.11	FIGNL1	-2.19329	0.028287	0.643841	2	2	2	0.003346	0.731337
ENSG00000198039.11	ZNF273	2.19237	0.028353	0.1494	3	3	3	0.044337	0.49828
ENSG00000165953.9	SERPINA12	2.19165	0.028405	0.029267	1	1	1	0.028405	0.245843
ENSG00000111837.11	MAK	-2.1913	0.02843	1.52e-05	1	1	1	0.02843	0.020514
ENSG00000251136.8	RP11-37B2.1	2.18868	0.02862	0.615091	3	3	3	0.021789	0.743058
ENSG00000247373.3	RP11-486O12.2	2.18775	0.028688	0.08786	2	2	2	0.016635	0.332775
ENSG00000137764.19	MAP2K5	-2.18696	0.028745	0.016806	2	2	2	0.028656	0.188582
ENSG00000126246.9	IGFLR1	2.18694	0.028747	0.007018	2	2	2	0.097723	0.289779
ENSG00000116525.13	TRIM62	2.18639	0.028787	0.003562	1	1	1	0.028787	0.098073
ENSG00000068885.14	IFT80	2.18595	0.028819	0.004487	1	1	1	0.028819	0.106967
ENSG00000141380.13	SS18	2.18536	0.028863	0.004301	2	2	2	0.045749	0.088086
ENSG00000101665.8	SMAD7	2.18513	0.028879	0.00261	1	1	1	0.028879	0.078188
ENSG00000168566.12	SNRNP48	2.18496	0.028892	0.012331	3	3	3	0.031999	0.196162
ENSG00000143452.15	HORMAD1	-2.18414	0.028952	0.630291	1	2	2	0.028952	1.14745
ENSG00000161692.17	DBF4B	-2.1831	0.029029	0.134571	2	2	2	0.033279	0.726675
ENSG00000091106.18	NLRC4	-2.18292	0.029042	0.015775	1	1	1	0.029042	0.173473
ENSG00000147883.10	CDKN2B	-2.17721	0.029465	0.007636	2	2	2	4.03e-05	0.192462
ENSG00000137760.14	ALKBH8	2.17689	0.029489	0.004992	1	1	1	0.029489	0.13272
ENSG00000172478.17	C2orf54	2.17684	0.029493	0.009171	1	1	1	0.029493	0.15032
ENSG00000197536.11	C5orf56	2.17662	0.029509	0.005599	1	1	1	0.029509	0.105989
ENSG00000185608.8	MRPL40	2.17617	0.029543	0.000104	1	2	2	0.029543	0.014899
ENSG00000111206.12	FOXM1	-2.17596	0.029558	0.002636	2	2	2	0.045119	0.057633
ENSG00000163596.16	ICA1L	-2.17489	0.029639	0.015614	2	3	3	0.043958	0.273161
ENSG00000187193.8	MT1X	-2.1747	0.029653	0.152506	3	3	3	0.009596	0.309138
ENSG00000067334.13	DNTTIP2	-2.17439	0.029676	0.005266	1	2	2	0.029676	0.104748
ENSG00000010318.20	PHF7	-2.17195	0.029859	0.003185	1	1	1	0.029859	0.185209
ENSG00000063515.2	GSC2	2.17072	0.029952	0.018494	1	1	1	0.029952	0.329034
ENSG00000198203.9	SULT1C2	2.16915	0.030071	1.79757	3	3	3	0.047769	1.18493
ENSG00000240038.6	AMY2B	-2.16899	0.030084	0.020985	3	3	3	0.059905	0.205722
ENSG00000025434.18	NR1H3	-2.16845	0.030124	0.002816	2	2	2	0.00917	0.102909
ENSG00000161956.12	SENP3	-2.16828	0.030137	0.015927	3	3	3	0.008705	0.156353
ENSG00000114948.12	ADAM23	2.16815	0.030148	0.080672	3	3	3	0.028858	0.440564
ENSG00000144596.12	GRIP2	-2.16763	0.030187	0.509549	5	5	5	0.006747	0.720513
ENSG00000197872.11	FAM49A	-2.16571	0.030333	0.007522	2	2	2	0.030734	0.124713
ENSG00000158315.10	RHBDL2	-2.16559	0.030343	0.001927	1	1	1	0.030343	0.231119
ENSG00000183751.14	TBL3	-2.16555	0.030345	0.003194	1	1	1	0.030345	0.124345
ENSG00000198648.10	STK39	-2.16459	0.030419	0.001484	1	1	1	0.030419	0.085026
ENSG00000204657.3	OR2H2	2.16427	0.030443	0.025167	2	2	2	0.024265	0.2254
ENSG00000188051.6	TMEM221	-2.16394	0.030469	0.043474	1	1	1	0.030469	0.308109
ENSG00000101680.14	LAMA1	2.16393	0.03047	0.004529	1	1	1	0.03047	0.096959
ENSG00000113212.6	PCDHB7	2.16353	0.0305	0.000374	1	2	2	0.0305	0.099008
ENSG00000182885.16	ADGRG3	-2.16125	0.030676	0.004569	2	2	2	0.020896	0.136729
ENSG00000131067.16	GGT7	-2.16116	0.030683	0.021862	2	2	2	2.67e-09	0.197007
ENSG00000240972.1	MIF	-2.16085	0.030707	0.710886	2	2	2	0.041232	1.14007
ENSG00000136371.10	MTHFS	2.15956	0.030807	0.313724	3	4	4	0.063115	0.538593
ENSG00000225791.6	TRAM2-AS1	2.15859	0.030882	0.00766	2	2	2	0.022093	0.092204
ENSG00000111271.14	ACAD10	2.15764	0.030956	0.000811	1	1	1	0.030956	0.105639
ENSG00000133739.15	LRRCC1	-2.15726	0.030985	0.006562	1	1	1	0.030985	0.17315
ENSG00000134324.11	LPIN1	2.15712	0.030996	0.021736	1	1	1	0.030996	0.217078
ENSG00000188613.6	NANOS1	-2.15674	0.031026	0.011254	1	1	1	0.031026	0.163126
ENSG00000255874.2	LINC00346	-2.15652	0.031043	0.018465	1	1	1	0.031043	0.298241
ENSG00000260377.1	RP11-646E18.4	2.15614	0.031073	0.555237	4	4	4	0.020709	0.354806
ENSG00000101150.17	TPD52L2	-2.15556	0.031118	0.006005	3	3	3	0.040912	0.192908
ENSG00000133433.10	GSTT2B	2.15489	0.03117	1.37086	4	6	6	0.041163	1.61351
ENSG00000117155.16	SSX2IP	-2.15265	0.031346	0.000517	2	2	2	0.026207	0.073637
ENSG00000261222.2	CTD-2006K23.1	-2.15214	0.031386	0.00613	1	1	1	0.031386	0.108028
ENSG00000241151.1	LINC02066	2.14975	0.031575	0.000243	1	1	1	0.031575	0.023831
ENSG00000267834.1	RP11-167N5.5	-2.14766	0.03174	0.001348	1	1	1	0.03174	0.054497
ENSG00000184164.14	CRELD2	-2.14666	0.03182	0.016985	1	1	1	0.03182	0.237847
ENSG00000273192.1	CITF22-1A6.3	-2.14666	0.03182	0.017732	1	2	2	0.03182	0.243025
ENSG00000205517.12	RGL3	2.14572	0.031895	0.00366	1	2	2	0.031895	0.091426
ENSG00000249740.2	OSMR-AS1	-2.14445	0.031997	0.123091	3	3	3	0.002178	0.384513
ENSG00000131941.7	RHPN2	2.14436	0.032004	0.009369	3	3	3	0.019913	0.14269
ENSG00000116017.10	ARID3A	2.14185	0.032205	5.13e-08	1	1	1	0.032205	0.001009
ENSG00000204859.12	ZBTB48	-2.13982	0.032369	0.003458	2	2	2	0.076402	0.079698
ENSG00000137965.10	IFI44	2.13921	0.032418	0.005286	2	2	2	0.041271	0.184173
ENSG00000143494.15	VASH2	2.13873	0.032458	0.008915	1	1	1	0.032458	0.135631
ENSG00000013288.8	MAN2B2	-2.13846	0.03248	0.112763	2	2	2	0.053841	0.53365
ENSG00000273381.1	RP11-305L7.7	2.13827	0.032495	0.005837	3	3	3	0.012597	0.301457
ENSG00000213619.9	NDUFS3	-2.13783	0.032531	4.58e-05	1	1	1	0.032531	0.013429
ENSG00000196109.6	ZNF676	2.13766	0.032544	0.019779	1	1	1	0.032544	0.204985
ENSG00000152463.14	OLAH	-2.13491	0.032768	0.000204	1	1	1	0.032768	0.019956
ENSG00000177103.13	DSCAML1	-2.13453	0.032799	0.037434	2	4	4	0.031793	0.287513
ENSG00000187944.2	C2orf66	-2.13262	0.032956	0.032845	2	2	2	0.080098	0.426119
ENSG00000134809.8	TIMM10	-2.13246	0.032969	0.173302	2	2	2	0.074338	0.545858
ENSG00000273142.1	RP11-458F8.4	2.1304	0.033139	0.106798	3	4	4	0.079966	0.699902
ENSG00000115977.18	AAK1	-2.12979	0.033189	0.008147	1	1	1	0.033189	0.132441
ENSG00000166348.18	USP54	2.12932	0.033228	0.000774	2	2	2	0.019293	0.087154
ENSG00000105668.7	UPK1A	-2.12665	0.033449	0.696582	4	4	4	0.016933	1.33137
ENSG00000141076.17	UTP4	-2.12533	0.033559	0.037859	3	3	3	0.035865	0.781661
ENSG00000076984.17	MAP2K7	-2.12403	0.033668	0.00482	2	2	2	0.033465	0.097634
ENSG00000100592.15	DAAM1	2.12301	0.033753	0.00538	2	2	2	0.069586	0.1357
ENSG00000165914.14	TTC7B	2.11979	0.034024	0.102981	2	2	2	0.031246	0.431097
ENSG00000008118.9	CAMK1G	2.11975	0.034027	0.009847	1	1	1	0.034027	0.150094
ENSG00000073670.13	ADAM11	-2.11948	0.03405	0.019011	2	2	2	0.034757	0.264327
ENSG00000273356.1	LINC02019	-2.11937	0.034059	0.017168	1	1	1	0.034059	0.279875
ENSG00000114742.13	WDR48	-2.11862	0.034122	0.009161	2	3	3	0.035644	0.202741
ENSG00000173821.19	RNF213	-2.11846	0.034136	0.032642	2	2	2	0.074773	0.330027
ENSG00000167723.14	TRPV3	-2.11725	0.034239	0.05015	3	3	3	0.018001	0.249648
ENSG00000144063.3	MALL	2.11649	0.034303	0.005695	1	1	1	0.034303	0.115621
ENSG00000160602.13	NEK8	-2.11551	0.034386	0.00328	2	2	2	0.031523	0.088365
ENSG00000127585.11	FBXL16	-2.11464	0.03446	0.000908	1	1	1	0.03446	0.043053
ENSG00000185652.11	NTF3	2.11424	0.034495	0.012743	1	1	1	0.034495	0.215122
ENSG00000186166.8	CCDC84	2.11398	0.034517	0.00366	1	1	1	0.034517	0.096603
ENSG00000115687.13	PASK	2.11393	0.034521	6.36e-06	1	1	1	0.034521	0.006006
ENSG00000112996.10	MRPS30	-2.11372	0.034539	0.002795	1	1	1	0.034539	0.265317
ENSG00000112667.12	DNPH1	2.11223	0.034667	0.026747	2	2	2	0.016875	0.383841
ENSG00000275004.3	ZNF280B	2.11063	0.034804	0.000129	1	1	1	0.034804	0.026196
ENSG00000150401.14	DCUN1D2	-2.11039	0.034825	0.006949	3	3	3	0.083229	0.195754
ENSG00000170035.15	UBE2E3	2.11007	0.034852	0.027228	2	2	2	0.039176	0.147209
ENSG00000179950.13	PUF60	-2.10967	0.034887	0.002122	1	1	1	0.034887	0.11637
ENSG00000107614.21	TRDMT1	2.10937	0.034912	0.000798	2	3	3	0.119748	0.141015
ENSG00000169718.17	DUS1L	2.10879	0.034963	8.46e-05	1	1	1	0.034963	0.052617
ENSG00000272791.1	RP11-464F9.22	-2.1084	0.034997	0.001892	2	2	2	0.033317	0.161206
ENSG00000108448.20	TRIM16L	2.10757	0.035068	0.03852	2	4	4	0.021065	0.324863
ENSG00000168077.13	SCARA3	2.10674	0.03514	0.024325	3	3	3	0.037133	0.202758
ENSG00000059573.8	ALDH18A1	-2.10178	0.035572	0.000506	1	2	2	0.035572	0.070341
ENSG00000177469.12	PTRF	-2.10153	0.035594	0.002435	1	1	1	0.035594	0.075949
ENSG00000196968.10	FUT11	-2.09953	0.03577	0.028616	2	2	2	0.009286	0.175535
ENSG00000175426.10	PCSK1	-2.0984	0.03587	0.024522	2	2	2	0.090287	0.179346
ENSG00000140464.19	PML	-2.09828	0.03588	0.009832	2	2	2	0.006903	0.126777
ENSG00000203805.10	PLPP4	-2.09781	0.035922	0.006373	1	1	1	0.035922	0.173799
ENSG00000138688.15	KIAA1109	-2.09718	0.035978	0.006398	2	2	2	0.076207	0.393446
ENSG00000158869.10	FCER1G	2.09705	0.035989	0.01419	2	2	2	0.089948	0.158484
ENSG00000077097.15	TOP2B	-2.09594	0.036088	0.00137	2	2	2	0.036103	0.059135
ENSG00000164182.10	NDUFAF2	-2.09552	0.036125	0.001176	2	2	2	0.064112	0.076781
ENSG00000089154.10	GCN1	2.09504	0.036167	0.022052	2	2	2	0.060004	0.210881
ENSG00000132109.9	TRIM21	-2.09418	0.036244	0.011829	2	2	2	0.034161	0.118124
ENSG00000146425.10	DYNLT1	2.09373	0.036284	0.007151	1	1	1	0.036284	0.120251
ENSG00000143878.9	RHOB	2.09314	0.036336	0.000159	1	1	1	0.036336	0.047824
ENSG00000221909.2	FAM200A	-2.09247	0.036397	7.54e-08	1	1	1	0.036397	0.000672
ENSG00000148690.11	FRA10AC1	2.09226	0.036415	0.118045	3	3	3	0.043252	0.384329
ENSG00000169413.2	RNASE6	-2.0921	0.036429	0.010871	1	1	1	0.036429	0.144663
ENSG00000206503.12	HLA-A	-2.09204	0.036435	0.187912	3	4	4	0.084483	0.435913
ENSG00000160593.18	JAML	-2.09137	0.036494	0.003094	1	1	1	0.036494	0.097193
ENSG00000065328.16	MCM10	2.09127	0.036504	0.000477	1	2	2	0.036504	0.065901
ENSG00000224934.2	RP11-441O15.3	-2.08917	0.036692	0.016901	2	2	2	0.016488	0.167049
ENSG00000183354.11	KIAA2026	-2.08909	0.0367	0.001422	1	1	1	0.0367	0.066695
ENSG00000129055.12	ANAPC13	-2.08875	0.03673	0.125633	1	1	1	0.03673	0.538533
ENSG00000166140.17	ZFYVE19	-2.08844	0.036758	0.026162	3	3	3	0.00538	0.171124
ENSG00000104388.14	RAB2A	-2.08794	0.036803	0.03734	2	2	2	0.013214	0.209239
ENSG00000179627.9	ZBTB42	-2.08754	0.03684	0.001099	1	1	1	0.03684	0.071895
ENSG00000198417.6	MT1F	2.08738	0.036854	0.02286	1	1	1	0.036854	0.308601
ENSG00000213996.12	TM6SF2	-2.0848	0.037088	0.084027	2	2	2	0.042626	0.279335
ENSG00000115524.15	SF3B1	2.08429	0.037134	0.00776	1	1	1	0.037134	0.137401
ENSG00000261308.2	FIGNL2	2.08338	0.037216	0.001081	1	1	1	0.037216	0.051353
ENSG00000143811.18	PYCR2	-2.08266	0.037282	0.082395	2	2	2	0.041433	0.919541
ENSG00000100528.11	CNIH1	-2.08229	0.037316	0.041035	3	3	3	0.062835	0.382192
ENSG00000167992.12	VWCE	-2.08215	0.037329	3.13e-05	1	2	2	0.037329	0.042356
ENSG00000124279.11	FASTKD3	-2.0814	0.037397	0.010165	1	1	1	0.037397	0.408681
ENSG00000154127.9	UBASH3B	2.08123	0.037413	0.002208	2	2	2	0.052504	0.080673
ENSG00000124201.14	ZNFX1	-2.08098	0.037436	0.002084	2	2	2	0.039823	0.066389
ENSG00000186020.12	ZNF529	-2.0806	0.037471	0.010485	2	2	2	0.037911	0.161754
ENSG00000106484.14	MEST	2.07887	0.037629	0.016291	2	2	2	0.004533	0.156685
ENSG00000108064.10	TFAM	2.07821	0.03769	0.009006	2	2	2	0.028498	0.153005
ENSG00000100485.11	SOS2	-2.07797	0.037712	0.010602	2	2	2	0.03928	0.224693
ENSG00000105383.14	CD33	2.07572	0.03792	0.003316	1	2	2	0.03792	0.080832
ENSG00000277587.1	CTD-3116E22.8	-2.07469	0.038015	0.130046	2	2	2	0.027022	0.378277
ENSG00000114735.9	HEMK1	-2.07454	0.03803	0.010966	2	2	2	0.022356	0.119315
ENSG00000173705.8	SUSD5	-2.07247	0.038222	0.012244	3	3	3	0.016919	0.240315
ENSG00000065809.13	FAM107B	-2.07232	0.038236	0.036677	1	1	1	0.038236	0.284385
ENSG00000099282.9	TSPAN15	-2.0711	0.038349	0.125725	3	3	3	0.066301	0.540301
ENSG00000278266.1	RP11-575F12.3	2.07102	0.038357	0.019878	2	2	2	0.074635	0.273998
ENSG00000153253.16	SCN3A	2.07076	0.038382	0.002607	1	1	1	0.038382	0.098148
ENSG00000197084.5	LCE1C	-2.06961	0.038489	2.68e-07	1	1	1	0.038489	0.000993
ENSG00000062282.14	DGAT2	2.0688	0.038565	0.000202	1	1	1	0.038565	0.033363
ENSG00000274191.1	RP11-324E6.10	-2.06748	0.038689	0.010398	2	2	2	0.038679	0.169968
ENSG00000204740.10	MALRD1	-2.06694	0.03874	0.092381	2	2	2	0.133325	0.72902
ENSG00000110427.14	KIAA1549L	-2.06642	0.038788	0.047238	2	2	2	0.053465	0.229584
ENSG00000143751.9	SDE2	2.06493	0.038929	0.000843	2	2	2	0.010896	0.045753
ENSG00000165416.14	SUGT1	-2.06417	0.039002	0.018338	2	2	2	0.077596	0.359864
ENSG00000257108.1	NHLRC4	-2.06372	0.039044	0.002524	1	1	1	0.039044	0.084085
ENSG00000101079.20	NDRG3	-2.06247	0.039163	0.028129	3	3	3	7.62e-05	0.452083
ENSG00000082212.12	ME2	-2.06132	0.039273	0.005285	2	2	2	0.104051	0.184047
ENSG00000179532.12	DNHD1	-2.0613	0.039274	0.01679	3	3	3	0.02883	0.151629
ENSG00000176920.11	FUT2	-2.06051	0.03935	0.025656	2	2	2	0.042597	0.388571
ENSG00000090060.17	PAPOLA	2.05921	0.039474	0.016619	2	2	2	0.038094	0.126517
ENSG00000168291.12	PDHB	-2.05892	0.039502	0.028347	1	1	1	0.039502	0.314359
ENSG00000165802.21	NSMF	2.05814	0.039576	0.01831	2	2	2	0.066623	0.151696
ENSG00000115364.13	MRPL19	-2.05725	0.039662	0.106412	2	2	2	0.053616	0.305499
ENSG00000111203.11	ITFG2	-2.05707	0.039679	0.004731	2	2	2	0.020216	0.103809
ENSG00000103199.13	ZNF500	-2.05598	0.039784	0.109598	2	2	2	0.079085	0.3889
ENSG00000099290.15	WASHC2A	-2.05507	0.039873	0.084	2	3	3	0.01658	0.647278
ENSG00000143157.11	POGK	2.05419	0.039957	0.00452	1	1	1	0.039957	0.099344
ENSG00000169504.14	CLIC4	-2.05406	0.03997	7.67e-06	2	2	2	0.055669	0.011051
ENSG00000168802.12	CHTF8	2.05404	0.039971	0.002189	1	1	1	0.039971	0.073129
ENSG00000099889.13	ARVCF	-2.05211	0.040159	0.028716	4	4	4	0.066144	0.328916
ENSG00000228058.1	LINC01736	2.05132	0.040236	8.95e-05	2	2	2	0.038716	0.018413
ENSG00000164880.15	INTS1	2.05098	0.040269	0.725206	3	3	3	0.026835	0.484448
ENSG00000145824.12	CXCL14	-2.05007	0.040358	0.006371	2	2	2	0.059743	0.115993
ENSG00000142920.16	AZIN2	2.04934	0.040429	0.017626	2	2	2	0.035876	0.240853
ENSG00000260613.1	RP3-522J7.6	2.04782	0.040577	0.027861	2	2	2	0.052725	0.212536
ENSG00000155465.18	SLC7A7	-2.046	0.040756	0.011367	3	3	3	0.060103	0.202892
ENSG00000283696.1	RP11-122G18.12	2.044	0.040954	0.050106	2	2	2	0.073818	0.585061
ENSG00000131400.7	NAPSA	-2.04232	0.041119	0.014607	1	1	1	0.041119	0.177628
ENSG00000175548.8	ALG10B	2.04192	0.041159	1.8e-06	1	2	2	0.041159	0.007672
ENSG00000275832.4	ARHGAP23	-2.04096	0.041255	0.00605	1	1	1	0.041255	0.11228
ENSG00000186010.18	NDUFA13	-2.04065	0.041286	0.00161	2	2	2	0.016631	0.041368
ENSG00000269729.1	AC006262.4	2.04049	0.041301	0.006031	3	3	3	0.090669	0.144384
ENSG00000163820.14	FYCO1	-2.04015	0.041335	0.051251	4	4	4	0.010749	0.268118
ENSG00000110025.12	SNX15	-2.04014	0.041336	0.026923	1	1	1	0.041336	0.240687
ENSG00000186566.12	GPATCH8	2.03861	0.041489	0.000543	1	2	2	0.041489	0.033957
ENSG00000171773.2	NXNL1	2.03842	0.041508	0.021984	1	1	1	0.041508	0.210865
ENSG00000212127.5	TAS2R14	2.03749	0.041601	0.641563	4	4	4	0.023521	0.593069
ENSG00000183454.16	GRIN2A	-2.03703	0.041647	0.052412	2	2	2	0.014126	0.273905
ENSG00000104852.14	SNRNP70	-2.03671	0.041679	0.026285	2	2	2	0.034821	0.240911
ENSG00000196405.12	EVL	-2.03628	0.041722	0.024413	2	2	2	0.100587	0.340493
ENSG00000197982.13	C1orf122	2.03593	0.041757	5.82e-05	1	1	1	0.041757	0.012066
ENSG00000168060.15	NAALADL1	2.03583	0.041768	0.003682	1	1	1	0.041768	0.088634
ENSG00000127578.6	WFIKKN1	-2.03519	0.041832	0.375483	3	3	3	0.042084	0.979375
ENSG00000168268.10	NT5DC2	2.03471	0.041881	0.225451	3	3	3	0.033091	0.347989
ENSG00000079805.16	DNM2	2.03457	0.041895	0.001125	3	4	4	0.075127	0.084289
ENSG00000131375.9	CAPN7	2.03456	0.041896	0.002399	1	1	1	0.041896	0.097146
ENSG00000147889.17	CDKN2A	2.03454	0.041897	0.002065	2	2	2	4.68e-06	0.069714
ENSG00000105227.14	PRX	2.03385	0.041967	1.3e-10	1	1	1	0.041967	4.68e-05
ENSG00000050555.17	LAMC3	2.03373	0.041979	0.025499	3	4	4	0.05105	0.223147
ENSG00000186174.12	BCL9L	2.0332	0.042032	5.38e-05	1	1	1	0.042032	0.010497
ENSG00000245685.6	AF146191.4	-2.03313	0.04204	0.04402	2	2	2	0.015739	0.28268
ENSG00000234444.9	ZNF736	2.03231	0.042122	0.10028	5	5	5	0.044451	0.710855
ENSG00000112655.15	PTK7	-2.03162	0.042192	0.000705	1	1	1	0.042192	0.167928
ENSG00000250506.7	CDK3	-2.03058	0.042298	0.047969	3	3	3	0.050093	0.868992
ENSG00000144649.8	FAM198A	2.02956	0.042401	0.001795	1	2	2	0.042401	0.076774
ENSG00000270607.1	RP11-359E10.1	2.0295	0.042408	0.002192	1	1	1	0.042408	0.088552
ENSG00000113838.12	TBCCD1	2.02795	0.042566	4.87e-05	1	1	1	0.042566	0.013124
ENSG00000281912.1	LINC01144	-2.02573	0.042792	0.010735	1	1	1	0.042792	0.159091
ENSG00000136478.7	TEX2	2.02548	0.042818	0.00373	2	2	2	0.033473	0.172671
ENSG00000167081.16	PBX3	2.02536	0.04283	0.047446	2	2	2	0.052409	0.254388
ENSG00000240747.7	KRBOX1	2.02527	0.04284	0.00489	1	1	1	0.04284	0.341862
ENSG00000172379.20	ARNT2	2.02508	0.042859	0.020034	3	3	3	0.008354	0.272708
ENSG00000023608.4	SNAPC1	-2.02499	0.042869	0.01549	2	2	2	0.018	0.235741
ENSG00000053702.14	NRIP2	2.02455	0.042914	0.001239	2	2	2	0.049917	0.068972
ENSG00000175213.2	ZNF408	2.02449	0.04292	0.00204	2	2	2	0.042737	0.089987
ENSG00000143387.12	CTSK	2.02443	0.042926	7.51e-05	1	1	1	0.042926	0.02128
ENSG00000167258.13	CDK12	-2.02424	0.042946	0.000216	1	1	1	0.042946	0.024601
ENSG00000135482.6	ZC3H10	-2.02403	0.042967	0.001099	2	2	2	0.046844	0.107072
ENSG00000037749.11	MFAP3	2.02373	0.042997	0.005332	1	1	1	0.042997	0.140157
ENSG00000116157.5	GPX7	2.02323	0.04305	1.10902	4	4	4	0.043113	0.624498
ENSG00000168273.7	SMIM4	2.02245	0.04313	0.000983	1	1	1	0.04313	0.044614
ENSG00000111199.10	TRPV4	-2.02117	0.043262	0.037976	2	2	2	0.024713	0.236182
ENSG00000245330.4	KB-1471A8.1	2.02111	0.043269	0.031291	1	1	1	0.043269	0.253791
ENSG00000138613.13	APH1B	-2.02058	0.043323	0.028371	2	3	3	0.062547	0.318584
ENSG00000143365.17	RORC	-2.02042	0.04334	0.003973	3	3	3	0.089367	0.077748
ENSG00000125375.14	ATP5S	2.0196	0.043425	0.049265	4	5	5	0.026245	0.199027
ENSG00000272800.1	RP11-438L19.1	-2.01852	0.043537	0.021662	2	2	2	0.05719	0.410075
ENSG00000113407.13	TARS	2.01827	0.043563	0.027115	2	2	2	0.054309	0.613277
ENSG00000149182.14	ARFGAP2	-2.01804	0.043587	0.004005	2	2	2	0.009346	0.081924
ENSG00000148057.15	IDNK	2.01743	0.043651	0.025965	2	2	2	0.066211	0.169675
ENSG00000144580.13	CNOT9	-2.01683	0.043713	0.000693	1	1	1	0.043713	0.038712
ENSG00000179178.10	TMEM125	2.01637	0.043762	4.53e-06	1	1	1	0.043762	0.005266
ENSG00000172216.5	CEBPB	-2.01589	0.043812	1.11e-06	1	1	1	0.043812	0.001516
ENSG00000137672.12	TRPC6	2.01526	0.043877	0.051775	2	2	2	0.036667	0.335976
ENSG00000178988.10	MRFAP1L1	-2.01467	0.043939	0.00038	1	1	1	0.043939	0.031608
ENSG00000064999.13	ANKS1A	2.01369	0.044042	0.001861	1	1	1	0.044042	0.060475
ENSG00000185664.14	PMEL	2.01348	0.044064	0.010738	1	1	1	0.044064	0.280231
ENSG00000123374.10	CDK2	2.01348	0.044064	0.000384	1	2	2	0.044064	0.053014
ENSG00000188282.12	RUFY4	2.013	0.044115	0.031531	1	1	1	0.044115	0.259847
ENSG00000243819.4	RN7SL832P	2.01239	0.044179	0.147084	3	3	3	0.007769	0.597271
ENSG00000152580.8	IGSF10	2.01219	0.0442	0.002189	2	2	2	0.057781	0.074436
ENSG00000158406.4	HIST1H4H	-2.01205	0.044214	0.021385	3	3	3	0.041601	0.131958
ENSG00000196372.12	ASB13	-2.01157	0.044265	0.011994	3	3	3	0.025625	0.207574
ENSG00000025293.16	PHF20	-2.01112	0.044313	0.002602	1	2	2	0.044313	0.112696
ENSG00000138641.15	HERC3	2.01108	0.044317	1.43e-05	1	2	2	0.044317	0.009503
ENSG00000070404.9	FSTL3	-2.01091	0.044335	3.52e-05	1	1	1	0.044335	0.039013
ENSG00000183763.8	TRAIP	-2.01072	0.044355	0.000613	1	1	1	0.044355	0.037672
ENSG00000125144.13	MT1G	-2.00956	0.044478	0.056663	4	4	4	0.013302	0.388297
ENSG00000153317.14	ASAP1	-2.00907	0.044529	0.08985	3	3	3	0.078427	0.874609
ENSG00000182400.14	TRAPPC6B	2.00901	0.044536	0.007442	2	2	2	0.058538	0.195478
ENSG00000173889.15	PHC3	2.00778	0.044666	0.00035	1	1	1	0.044666	0.037938
ENSG00000186648.14	CARMIL3	-2.00757	0.044689	0.032229	4	4	4	0.018158	0.414264
ENSG00000125686.11	MED1	2.00587	0.04487	0.000411	2	2	2	0.03992	0.027593
ENSG00000152749.7	GPR180	-2.00561	0.044898	0.780176	2	2	2	0.041481	0.620172
ENSG00000037637.10	FBXO42	2.00502	0.04496	0.00281	2	2	2	0.056684	0.052818
ENSG00000187715.13	KBTBD12	2.00496	0.044967	0.012443	1	1	1	0.044967	0.374093
ENSG00000171466.9	ZNF562	2.00485	0.044979	0.01297	2	2	2	0.032469	0.138214
ENSG00000172197.10	MBOAT1	2.00478	0.044987	0.067517	3	3	3	0.046004	0.319431
ENSG00000112531.16	QKI	-2.00454	0.045012	5.26e-05	1	1	1	0.045012	0.021086
ENSG00000171928.13	TVP23B	-2.00453	0.045013	0.064577	1	2	2	0.045013	0.414059
ENSG00000170860.3	LSM3	-2.00374	0.045098	0.001693	1	1	1	0.045098	0.058291
ENSG00000105879.11	CBLL1	2.00359	0.045114	0.000278	1	1	1	0.045114	0.026105
ENSG00000203786.6	KPRP	-2.00254	0.045227	0.002064	1	2	2	0.045227	0.088813
ENSG00000253678.1	RP11-981G7.3	2.00226	0.045256	0.054915	2	2	2	0.018118	0.317301
ENSG00000163053.10	SLC16A14	2.00224	0.045258	0.002237	2	2	2	0.015595	0.11222
ENSG00000167491.17	GATAD2A	-2.0021	0.045274	0.003362	2	2	2	0.063901	0.104552
ENSG00000092871.16	RFFL	-2.00168	0.04532	0.052929	2	2	2	0.100427	0.287172
ENSG00000138696.10	BMPR1B	-2.00117	0.045374	0.023451	1	1	1	0.045374	0.272531
ENSG00000187801.14	ZFP69B	-2.00072	0.045422	0.000254	1	1	1	0.045422	0.034528
ENSG00000116489.12	CAPZA1	-2.00013	0.045486	0.002951	1	1	1	0.045486	0.085069
ENSG00000134108.12	ARL8B	-1.9998	0.045522	0.000539	1	1	1	0.045522	0.036593
ENSG00000105289.14	TJP3	1.99909	0.045599	0.010934	2	2	2	0.065715	0.182329
ENSG00000145012.13	LPP	1.9986	0.045652	0.001626	1	1	1	0.045652	0.062391
ENSG00000148399.12	DPH7	-1.99846	0.045667	0.011047	1	1	1	0.045667	0.18546
ENSG00000176834.13	VSIG10	1.99781	0.045738	0.191533	4	4	4	0.089516	0.410008
ENSG00000254531.1	FLJ20021	-1.99698	0.045827	0.055606	2	2	2	0.058676	0.301053
ENSG00000198848.12	CES1	-1.99679	0.045848	0.202898	3	4	4	0.009778	0.611191
ENSG00000115053.15	NCL	1.99622	0.045909	0.001728	1	1	1	0.045909	0.071718
ENSG00000164610.8	RP9	-1.99585	0.04595	0.026667	2	2	2	0.012291	0.265221
ENSG00000166801.15	FAM111A	-1.99503	0.046039	0.009826	1	1	1	0.046039	0.25475
ENSG00000145362.17	ANK2	-1.99464	0.046083	1.79e-07	1	1	1	0.046083	0.000918
ENSG00000177508.11	IRX3	1.99283	0.046281	7.97e-05	1	1	1	0.046281	0.040462
ENSG00000169609.13	C15orf40	-1.99245	0.046321	0.260972	5	5	5	0.073135	0.423693
ENSG00000241058.3	NSUN6	-1.9923	0.046338	0.160065	3	3	3	0.010742	0.362667
ENSG00000057704.12	TMCC3	1.99144	0.046433	0.012016	1	1	1	0.046433	0.151946
ENSG00000184292.6	TACSTD2	-1.99141	0.046436	0.002438	2	3	3	0.046459	0.071317
ENSG00000105894.11	PTN	1.99124	0.046454	0.006705	1	1	1	0.046454	0.11973
ENSG00000138944.7	KIAA1644	-1.99015	0.046574	0.002103	2	2	2	0.062921	0.085261
ENSG00000230615.6	RP5-1198O20.4	1.99013	0.046577	0.000336	1	2	2	0.046577	0.035704
ENSG00000115423.18	DNAH6	-1.98996	0.046596	0.358998	3	3	3	0.083193	0.701366
ENSG00000148411.7	NACC2	-1.98988	0.046604	0.000117	1	1	1	0.046604	0.040962
ENSG00000137809.16	ITGA11	-1.98981	0.046612	0.010804	1	1	1	0.046612	0.146918
ENSG00000126602.10	TRAP1	1.98872	0.046732	0.302195	2	2	2	0.029632	0.827602
ENSG00000135404.11	CD63	1.98771	0.046843	3.34e-08	1	1	1	0.046843	0.000841
ENSG00000187741.14	FANCA	-1.98707	0.046915	0.011347	2	2	2	1.81e-05	0.137205
ENSG00000224652.1	LINC00885	1.98688	0.046936	0.03719	3	4	4	0.012677	0.232116
ENSG00000156795.6	WDYHV1	1.98679	0.046946	0.126191	1	1	1	0.046946	0.529444
ENSG00000171792.10	RHNO1	-1.98623	0.047008	0.204107	3	3	3	0.031103	0.331207
ENSG00000068831.18	RASGRP2	1.98536	0.047105	0.000871	1	1	1	0.047105	0.073315
ENSG00000106809.10	OGN	1.98362	0.047298	0.008665	2	2	2	0.052049	0.123431
ENSG00000184979.9	USP18	-1.98182	0.047499	0.002585	1	2	2	0.047499	0.131796
ENSG00000175283.7	DOLK	-1.97967	0.047741	0.010004	2	2	2	0.050727	0.148683
ENSG00000169258.6	GPRIN1	-1.97901	0.047815	0.149287	3	3	3	0.03088	0.516894
ENSG00000085831.15	TTC39A	-1.9787	0.04785	0.0069	2	2	2	0.046355	0.170843
ENSG00000067596.10	DHX8	1.97864	0.047856	0.05034	2	3	3	0.095269	0.35842
ENSG00000196689.11	TRPV1	-1.97851	0.047872	0.057386	3	3	3	0.022399	0.387806
ENSG00000155792.9	DEPTOR	-1.97832	0.047892	0.03545	2	2	2	0.043269	0.261079
ENSG00000189339.11	SLC35E2B	1.97608	0.048146	0.603758	3	3	3	0.140787	1.0233
ENSG00000149679.11	CABLES2	-1.97477	0.048295	0.189919	1	2	2	0.048295	0.636475
ENSG00000274209.4	ANTXRL	1.97469	0.048304	0.058283	1	1	1	0.048304	0.424894
ENSG00000176532.3	PRR15	-1.97383	0.048401	0.047244	3	3	3	0.039628	0.442509
ENSG00000007944.14	MYLIP	1.9737	0.048416	0.04912	2	2	2	0.033653	0.217061
ENSG00000141385.9	AFG3L2	-1.97307	0.048488	0.001251	3	3	3	0.045172	0.06285
ENSG00000249709.7	ZNF564	-1.97291	0.048506	7.56e-05	1	1	1	0.048506	0.028414
ENSG00000177707.10	NECTIN3	-1.97258	0.048543	0.000358	1	1	1	0.048543	0.069106
ENSG00000266258.1	LINC01909	-1.97241	0.048563	0.027463	2	2	2	0.039792	0.322513
ENSG00000164251.4	F2RL1	1.97178	0.048635	0.015593	3	3	3	0.055397	0.172117
ENSG00000143622.10	RIT1	-1.9696	0.048884	0.05556	1	1	1	0.048884	0.340043
ENSG00000111885.6	MAN1A1	-1.96913	0.048938	2.99e-05	2	2	2	0.117922	0.014585
ENSG00000134247.9	PTGFRN	-1.96846	0.049015	0.000112	1	1	1	0.049015	0.024002
ENSG00000213888.3	LINC01521	-1.96834	0.049029	0.00727	2	2	2	0.053275	0.179569
ENSG00000214546.3	AC087491.2	-1.96699	0.049184	0.040054	2	2	2	0.025374	0.277165
ENSG00000139178.10	C1RL	-1.9669	0.049195	0.010325	4	4	4	0.027215	0.399611
ENSG00000156990.14	RPUSD3	-1.96668	0.04922	0.028645	1	1	1	0.04922	0.50618
ENSG00000114771.13	AADAC	-1.9661	0.049287	0.136699	3	3	3	0.054401	0.590277
ENSG00000073756.11	PTGS2	1.96512	0.0494	0.000117	1	1	1	0.0494	0.021196
ENSG00000058453.16	CROCC	1.965	0.049414	0.085761	2	5	5	0.108126	0.357304
ENSG00000063176.15	SPHK2	1.96459	0.049461	0.009628	2	2	2	0.013687	0.200431
ENSG00000111181.12	SLC6A12	1.96359	0.049578	0.010489	2	2	2	0.061073	0.176182
ENSG00000203386.6	LINC01317	1.96336	0.049604	0.026568	1	1	1	0.049604	0.387122
ENSG00000243572.1	LINC02017	1.9627	0.049682	0.005019	1	1	1	0.049682	0.110855
ENSG00000197375.12	SLC22A5	-1.96244	0.049711	0.163346	2	2	2	0.045011	0.488947
ENSG00000114738.10	MAPKAPK3	-1.96147	0.049824	0.000526	2	2	2	0.052396	0.049976
ENSG00000132561.13	MATN2	1.96132	0.049842	0.020959	2	2	2	0.049623	0.206887
ENSG00000068976.13	PYGM	1.96104	0.049874	3.2e-05	1	1	1	0.049874	0.012747
ENSG00000116793.15	PHTF1	1.96054	0.049933	0.002698	1	1	1	0.049933	0.091362

## Sheet: Table S4
Table S4.The significant TWAS analysis results between Whole Blood and melanoma.
gene	gene_name	zscore	pvalue	var_g	n_snps_used	n_snps_in_cov	n_snps_in_model	best_gwas_p	largest_weight
ENSG00000140995.16	DEF8	10.1663	2.8e-24	0.001399	2	2	2	1.24e-22	0.063279
ENSG00000003249.13	DBNDD1	9.11472	7.89e-20	0.030604	1	2	2	7.89e-20	0.34156
ENSG00000167523.13	SPATA33	-8.13592	4.09e-16	0.053651	2	3	3	8.82e-29	0.277044
ENSG00000099810.18	MTAP	7.16788	7.62e-13	0.007633	2	2	2	7.61e-13	0.120999
ENSG00000131165.14	CHMP1A	-6.83152	8.4e-12	0.005662	3	4	4	2.14e-24	0.131244
ENSG00000101460.12	MAP1LC3A	-6.67184	2.53e-11	0.02474	1	1	1	2.53e-11	0.326813
ENSG00000197912.14	SPG7	-6.00313	1.94e-09	0.015348	1	1	1	1.94e-09	0.174057
ENSG00000141013.16	GAS8	-4.7615	1.92e-06	0.048961	3	3	3	7.87e-06	0.30764
ENSG00000167522.14	ANKRD11	-4.40548	1.06e-05	0.008996	1	1	1	1.06e-05	0.134745
ENSG00000131067.16	GGT7	-4.32196	1.55e-05	0.014208	2	2	2	2.67e-09	0.129345
ENSG00000158792.15	SPATA2L	4.27731	1.89e-05	0.034338	2	2	2	4.44e-06	0.254396
ENSG00000169604.19	ANTXR1	-4.24284	2.21e-05	0.000291	1	1	1	2.21e-05	0.05586
ENSG00000164362.18	TERT	-4.21929	2.45e-05	8.07e-06	1	1	1	2.45e-05	0.0043
ENSG00000147889.17	CDKN2A	-4.07629	4.58e-05	0.007014	2	2	2	0.000102	0.157018
ENSG00000185324.21	CDK10	-3.88876	0.000101	0.000683	1	3	3	0.000101	0.039633
ENSG00000078804.12	TP53INP2	3.86913	0.000109	0.000554	1	1	1	0.000109	0.034818
ENSG00000183486.12	MX2	3.82829	0.000129	0.020972	2	2	2	2.06e-07	0.272797
ENSG00000166323.12	C11orf65	-3.8259	0.00013	0.002073	1	1	1	0.00013	0.086674
ENSG00000125977.6	EIF2S2	-3.80083	0.000144	0.000242	1	1	1	0.000144	0.02336
ENSG00000228265.5	RALY-AS1	3.7544	0.000174	0.005131	1	1	1	0.000174	0.10132
ENSG00000276073.1	RP5-1125A11.7	3.7544	0.000174	0.032796	1	1	1	0.000174	0.256167
ENSG00000213995.11	NAXD	3.63891	0.000274	0.107946	2	2	2	9.53e-05	0.622995
ENSG00000184988.8	TMEM106A	-3.6344	0.000279	0.002827	1	2	2	0.000279	0.091548
ENSG00000158793.13	NIT1	3.6023	0.000315	0.007132	2	2	2	0.000154	0.380589
ENSG00000187097.12	ENTPD5	-3.59345	0.000326	0.013077	3	3	3	0.007344	0.203545
ENSG00000132530.16	XAF1	-3.51274	0.000444	0.002143	2	3	3	0.000486	0.064288
ENSG00000253309.6	SERPINE3	-3.48241	0.000497	4.65e-05	1	1	1	0.000497	0.036505
ENSG00000105270.14	CLIP3	-3.427	0.00061	0.032264	4	4	4	0.003127	0.283787
ENSG00000163357.10	DCST1	-3.40177	0.00067	0.000335	1	1	1	0.00067	0.034731
ENSG00000163354.14	DCST2	3.40177	0.00067	0.001334	1	1	1	0.00067	0.069288
ENSG00000164104.11	HMGB2	-3.38715	0.000706	8.21e-06	1	1	1	0.000706	0.010813
ENSG00000113845.9	TIMMDC1	-3.34262	0.00083	0.00394	3	3	3	0.000795	0.121631
ENSG00000180596.7	HIST1H2BC	-3.32684	0.000878	6.11e-06	1	2	2	0.000878	0.005425
ENSG00000174574.15	AKIRIN1	3.3066	0.000944	0.001945	2	2	2	0.000946	0.100527
ENSG00000169217.8	CD2BP2	3.29241	0.000993	0.00481	1	2	2	0.000993	0.477667
ENSG00000122033.14	MTIF3	3.24756	0.001164	0.00291	2	2	2	0.001146	0.085459
ENSG00000158805.11	ZNF276	3.23291	0.001225	0.002611	2	2	2	0.001347	0.077786
ENSG00000100129.17	EIF3L	-3.21157	0.00132	0.001989	1	1	1	0.00132	0.131373
ENSG00000092067.5	CEBPE	3.19148	0.001415	2.3e-08	1	1	1	0.001415	0.000213
ENSG00000149639.14	SOGA1	-3.18808	0.001432	3.47e-06	1	1	1	0.001432	0.004382
ENSG00000157119.11	KLHL40	-3.18557	0.001445	1.14e-05	1	1	1	0.001445	0.005545
ENSG00000224478.1	RP11-13P5.1	-3.16021	0.001577	0.000362	2	2	2	0.003114	0.057401
ENSG00000144381.16	HSPD1	3.15599	0.0016	0.000909	1	1	1	0.0016	0.044596
ENSG00000143387.12	CTSK	-3.15299	0.001616	0.394001	4	4	4	0.001868	0.403294
ENSG00000171695.10	LKAAEAR1	3.14022	0.001688	0.009488	1	1	1	0.001688	0.140368
ENSG00000145730.20	PAM	3.12961	0.00175	0.190838	1	1	1	0.00175	0.665599
ENSG00000139970.16	RTN1	3.12305	0.00179	0.049683	3	3	3	0.020833	0.665415
ENSG00000166189.7	HPS6	-3.12026	0.001807	0.014127	2	2	2	0.001797	0.354479
ENSG00000198865.9	CCDC152	-3.11319	0.001851	0.01778	1	1	1	0.001851	0.215815
ENSG00000156735.10	BAG4	3.10878	0.001879	0.00345	1	2	2	0.001879	0.095338
ENSG00000153487.12	ING1	3.10258	0.001918	0.006793	2	2	2	0.001083	0.098315
ENSG00000003147.17	ICA1	-3.09172	0.00199	0.040112	4	4	4	0.001642	0.583682
ENSG00000155729.12	KCTD18	-3.07978	0.002072	0.00048	1	1	1	0.002072	0.057596
ENSG00000166436.15	TRIM66	3.0584	0.002225	0.417247	3	3	3	0.00299	0.609472
ENSG00000175773.12	RP11-121M22.1	-3.04055	0.002361	0.031037	2	2	2	0.002421	0.244481
ENSG00000155749.12	ALS2CR12	3.02198	0.002511	0.035431	1	1	1	0.002511	0.265489
ENSG00000164609.9	SLU7	3.01667	0.002556	0.001274	1	1	1	0.002556	0.071439
ENSG00000170502.12	NUDT9	-3.01171	0.002598	0.024704	3	3	3	0.009526	0.176748
ENSG00000104312.7	RIPK2	-3.00744	0.002635	0.003165	1	1	1	0.002635	0.083552
ENSG00000154263.17	ABCA10	-3.00357	0.002668	0.019766	2	2	2	0.006697	0.190818
ENSG00000104043.14	ATP8B4	-3.00282	0.002675	0.003445	1	1	1	0.002675	0.082072
ENSG00000176239.7	OR51B6	2.99587	0.002737	0.012235	2	2	2	0.00269	0.211582
ENSG00000166444.18	ST5	2.97968	0.002886	0.016732	2	2	2	0.012442	0.325342
ENSG00000128000.15	ZNF780B	2.97818	0.0029	0.000204	2	2	2	0.002854	0.036072
ENSG00000115170.13	ACVR1	2.97135	0.002965	7.58e-07	1	1	1	0.002965	0.003855
ENSG00000211445.11	GPX3	2.96975	0.00298	0.003375	1	1	1	0.00298	0.080044
ENSG00000109956.12	B3GAT1	-2.96784	0.002999	0.067176	2	2	2	0.002223	0.284243
ENSG00000108055.9	SMC3	-2.94898	0.003188	0.001842	1	1	1	0.003188	0.08894
ENSG00000181163.13	NPM1	2.94341	0.003246	9.1e-07	1	1	1	0.003246	0.00383
ENSG00000156966.6	B3GNT7	2.94268	0.003254	0.007603	1	1	1	0.003254	0.141236
ENSG00000243509.4	TNFRSF6B	-2.93697	0.003314	0.005993	1	1	1	0.003314	0.168279
ENSG00000033867.16	SLC4A7	-2.93455	0.00334	2.89e-07	1	1	1	0.00334	0.002453
ENSG00000116251.9	RPL22	-2.93116	0.003377	7.18e-06	1	1	1	0.003377	0.007498
ENSG00000099800.7	TIMM13	2.9301	0.003389	0.01312	3	3	3	0.000366	0.130457
ENSG00000130810.19	PPAN	-2.9145	0.003563	0.001081	2	2	2	0.00912	0.036334
ENSG00000225791.6	TRAM2-AS1	2.91356	0.003573	0.013097	2	2	2	0.003996	0.143138
ENSG00000179941.6	BBS10	-2.91322	0.003577	0.002048	1	1	1	0.003577	0.074046
ENSG00000204084.12	INPP5B	-2.90863	0.00363	0.64465	4	4	4	0.005928	0.505448
ENSG00000085788.13	DDHD2	2.89706	0.003767	0.001808	1	1	1	0.003767	0.069017
ENSG00000153922.10	CHD1	2.87552	0.004034	0.001237	2	3	3	0.003711	0.096424
ENSG00000165886.4	UBTD1	-2.86572	0.004161	0.000139	2	2	2	0.005056	0.041956
ENSG00000240875.5	LINC00886	-2.85604	0.00429	0.138907	4	4	4	3.77e-05	0.581735
ENSG00000204991.10	SPIRE2	-2.85451	0.00431	0.090375	3	3	3	0.007492	0.451658
ENSG00000054983.16	GALC	-2.85189	0.004346	0.00478	2	2	2	0.007706	0.124497
ENSG00000176153.11	GPX2	2.8506	0.004364	0.011737	1	1	1	0.004364	0.193365
ENSG00000157978.11	LDLRAP1	2.84973	0.004376	0.037794	2	2	2	0.005353	0.254929
ENSG00000198734.10	F5	-2.84284	0.004471	0.119622	3	3	3	0.006254	0.281452
ENSG00000127831.10	VIL1	-2.84016	0.004509	0.082676	2	2	2	0.003591	0.258939
ENSG00000154978.12	VOPP1	-2.83007	0.004654	0.010508	2	2	2	0.008495	0.521507
ENSG00000197982.13	C1orf122	2.8299	0.004656	9.05e-05	2	2	2	0.002612	0.013339
ENSG00000128789.20	PSMG2	-2.81979	0.004806	1.39e-05	1	1	1	0.004806	0.015174
ENSG00000122884.12	P4HA1	2.81879	0.004821	1.35e-05	1	1	1	0.004821	0.012221
ENSG00000038219.12	BOD1L1	2.81651	0.004855	0.011531	3	3	3	0.019905	0.173681
ENSG00000168928.12	CTRB2	-2.81064	0.004944	2.72e-08	1	1	1	0.004944	0.000654
ENSG00000173511.9	VEGFB	2.80982	0.004957	0.00176	2	2	2	0.01129	0.110537
ENSG00000158555.14	GDPD5	2.80945	0.004963	0.04905	3	3	3	0.008441	0.264116
ENSG00000105726.16	ATP13A1	-2.80205	0.005078	0.001491	2	2	2	0.016264	0.088042
ENSG00000116237.15	ICMT	-2.78732	0.005315	0.030136	3	3	3	0.007676	0.641626
ENSG00000168036.16	CTNNB1	2.78676	0.005324	0.001909	1	1	1	0.005324	0.061382
ENSG00000167930.15	FAM234A	2.78347	0.005378	0.013525	1	1	1	0.005378	0.21736
ENSG00000104129.9	DNAJC17	2.78334	0.00538	0.001378	1	1	1	0.00538	0.056072
ENSG00000178342.4	KCNG2	-2.76459	0.005699	0.052466	2	3	3	0.010857	0.335906
ENSG00000064225.12	ST3GAL6	-2.7621	0.005743	0.002761	1	1	1	0.005743	0.075073
ENSG00000159339.13	PADI4	-2.76106	0.005761	0.013848	3	4	4	0.017999	0.244494
ENSG00000125775.14	SDCBP2	2.7559	0.005853	0.073542	3	3	3	0.0206	0.22745
ENSG00000100266.18	PACSIN2	-2.75399	0.005887	0.021627	2	2	2	0.007066	0.172405
ENSG00000174606.13	ANGEL2	2.75228	0.005918	0.028771	3	3	3	0.012902	0.219538
ENSG00000235750.9	KIAA0040	-2.75088	0.005944	0.005193	2	2	2	0.00388	0.133998
ENSG00000125967.16	NECAB3	2.74982	0.005963	0.001177	1	1	1	0.005963	0.051793
ENSG00000138286.14	FAM149B1	2.74583	0.006036	0.006606	1	1	1	0.006036	0.270251
ENSG00000162174.12	ASRGL1	-2.72901	0.006352	0.045567	2	2	2	0.003972	0.456453
ENSG00000135823.13	STX6	-2.72728	0.006386	0.027032	4	4	4	7.38e-05	0.467904
ENSG00000175691.8	ZNF77	-2.72529	0.006424	0.033308	1	1	1	0.006424	0.615065
ENSG00000118922.17	KLF12	-2.72166	0.006496	0.000722	1	1	1	0.006496	0.049312
ENSG00000260588.1	RP11-930P14.2	2.71937	0.006541	0.003332	2	2	2	0.004405	0.107521
ENSG00000198752.10	CDC42BPB	-2.7098	0.006732	0.002706	1	1	1	0.006732	0.074811
ENSG00000088387.18	DOCK9	-2.70971	0.006734	0.00036	1	3	3	0.006734	0.040747
ENSG00000101464.10	PIGU	-2.70928	0.006743	0.002755	1	1	1	0.006743	0.076242
ENSG00000163586.9	FABP1	2.70636	0.006803	0.000525	1	1	1	0.006803	0.054148
ENSG00000119772.16	DNMT3A	2.70634	0.006803	0.006982	1	1	1	0.006803	0.231801
ENSG00000134900.11	TPP2	-2.69841	0.006967	0.006216	2	2	2	0.001772	0.066856
ENSG00000274979.1	RP11-1143G9.5	-2.69538	0.007031	0.107412	2	2	2	0.007228	0.447302
ENSG00000174891.12	RSRC1	-2.69448	0.00705	0.031297	2	2	2	0.000988	0.225639
ENSG00000057019.15	DCBLD2	-2.6857	0.007238	0.005108	2	2	2	0.005498	0.096854
ENSG00000119636.15	BBOF1	2.68085	0.007344	0.005219	1	1	1	0.007344	0.167285
ENSG00000040531.14	CTNS	2.67769	0.007413	0.058576	2	2	2	0.024516	0.305092
ENSG00000163590.13	PPM1L	-2.67527	0.007467	0.003367	2	2	2	0.006815	0.206158
ENSG00000149506.11	ZP1	2.6723	0.007533	4.27e-07	1	1	1	0.007533	0.003086
ENSG00000160213.6	CSTB	2.67016	0.007581	0.286559	3	3	3	0.007239	0.452181
ENSG00000166140.17	ZFYVE19	-2.66976	0.007591	0.022757	2	2	2	0.00538	0.216388
ENSG00000239732.3	TLR9	-2.66661	0.007662	0.000692	1	1	1	0.007662	0.086427
ENSG00000184445.11	KNTC1	2.66061	0.0078	0.002647	1	1	1	0.0078	0.131334
ENSG00000215252.11	GOLGA8B	-2.65989	0.007817	0.075215	6	7	7	0.044647	0.753722
ENSG00000150961.14	SEC24D	-2.65812	0.007858	0.001523	1	1	1	0.007858	0.11451
ENSG00000277767.1	RP11-365P13.5	-2.65014	0.008046	0.037534	1	1	1	0.008046	0.286998
ENSG00000184164.14	CRELD2	-2.64508	0.008167	0.066817	1	1	1	0.008167	0.459913
ENSG00000143167.11	GPA33	-2.64039	0.008281	2.07e-05	2	2	2	0.004167	0.014665
ENSG00000108733.9	PEX12	2.63584	0.008393	0.002336	1	1	1	0.008393	0.090592
ENSG00000170430.9	MGMT	2.63166	0.008497	0.221833	4	4	4	0.001074	0.6764
ENSG00000123240.16	OPTN	-2.62591	0.008642	0.002009	2	2	2	0.026897	0.101206
ENSG00000169169.14	CPT1C	2.62257	0.008727	0.015276	2	3	3	0.010904	0.365787
ENSG00000109944.10	C11orf63	-2.61731	0.008863	0.003613	1	1	1	0.008863	0.284917
ENSG00000182586.8	LINC00334	-2.61479	0.008928	0.002157	1	1	1	0.008928	0.073724
ENSG00000122882.10	ECD	-2.61041	0.009043	6.32e-05	1	1	1	0.009043	0.025822
ENSG00000267834.1	RP11-167N5.5	-2.60982	0.009059	0.003722	2	2	2	0.007272	0.08326
ENSG00000262468.5	LINC01569	-2.60959	0.009065	0.019655	2	2	2	0.018192	0.23082
ENSG00000177565.16	TBL1XR1	-2.60951	0.009067	2.11e-06	1	1	1	0.009067	0.007616
ENSG00000122642.10	FKBP9	2.6076	0.009118	0.018427	2	2	2	0.008007	0.230252
ENSG00000075415.12	SLC25A3	-2.60474	0.009195	0.000794	2	2	2	0.009408	0.080861
ENSG00000258289.8	CHURC1	-2.59919	0.009345	0.729877	2	2	2	0.006556	0.933761
ENSG00000169752.16	NRG4	2.5929	0.009517	0.000717	1	1	1	0.009517	0.053314
ENSG00000166164.15	BRD7	-2.59218	0.009537	0.31423	3	3	3	0.008184	0.729689
ENSG00000182107.6	TMEM30B	-2.5911	0.009567	3.31e-06	1	1	1	0.009567	0.008957
ENSG00000187474.4	FPR3	-2.59024	0.009591	0.019278	2	3	3	0.016448	0.240404
ENSG00000131471.6	AOC3	-2.58604	0.009709	1.32e-05	1	1	1	0.009709	0.010081
ENSG00000081791.8	KIAA0141	-2.58588	0.009713	0.017792	2	2	2	0.0119	0.189113
ENSG00000268471.6	DKFZP434I0714	-2.581	0.009852	1.04e-05	1	1	1	0.009852	0.01927
ENSG00000135250.16	SRPK2	-2.58042	0.009868	0.015344	1	1	1	0.009868	0.17862
ENSG00000068650.18	ATP11A	2.57958	0.009892	0.001115	2	2	2	0.009585	0.05043
ENSG00000164068.15	RNF123	-2.57052	0.010155	0.00193	1	1	1	0.010155	0.061551
ENSG00000175489.9	LRRC25	-2.56721	0.010252	0.028923	2	3	3	0.006414	0.221098
ENSG00000176928.5	GCNT4	-2.5655	0.010303	0.009847	2	2	2	0.01425	0.236175
ENSG00000176986.15	SEC24C	2.56482	0.010323	2.47e-05	1	1	1	0.010323	0.010462
ENSG00000104695.12	PPP2CB	2.56237	0.010396	0.130304	3	3	3	0.00242	0.76292
ENSG00000257261.5	RP11-96H19.1	2.56127	0.010429	0.212145	2	2	2	0.025142	0.667248
ENSG00000260507.1	RP11-356C4.3	2.55519	0.010613	0.000776	1	2	2	0.010613	0.088185
ENSG00000166801.15	FAM111A	-2.55169	0.01072	0.004914	2	2	2	0.009999	0.112052
ENSG00000166321.13	NUDT13	-2.54983	0.010777	0.079469	1	1	1	0.010777	0.866495
ENSG00000065243.19	PKN2	2.54891	0.010806	0.00013	1	1	1	0.010806	0.049003
ENSG00000172954.13	LCLAT1	-2.5471	0.010862	0.032439	2	2	2	0.006011	0.286865
ENSG00000143751.9	SDE2	2.546	0.010896	0.000929	1	1	1	0.010896	0.068468
ENSG00000133313.14	CNDP2	-2.54564	0.010908	0.026483	3	3	3	0.023694	0.26252
ENSG00000220205.8	VAMP2	2.54501	0.010928	0.004071	1	1	1	0.010928	0.094985
ENSG00000136986.9	DERL1	-2.54439	0.010947	0.011827	2	2	2	0.003009	0.228219
ENSG00000172403.10	SYNPO2	-2.54237	0.01101	2.49e-05	3	3	3	0.009278	0.013376
ENSG00000139178.10	C1RL	-2.54131	0.011044	0.006835	2	2	2	0.033694	0.097245
ENSG00000254415.3	SIGLEC14	-2.54022	0.011078	0.704425	4	4	4	0.016349	0.947181
ENSG00000059758.7	CDK17	-2.53337	0.011297	0.000237	2	2	2	0.012025	0.02131
ENSG00000170260.8	ZNF212	2.53086	0.011378	0.040001	2	2	2	0.008556	0.277753
ENSG00000127554.12	GFER	-2.52887	0.011443	0.006831	2	2	2	0.00828	0.142284
ENSG00000143569.18	UBAP2L	-2.52723	0.011497	1.48e-05	1	2	2	0.011497	0.013074
ENSG00000186642.15	PDE2A	-2.5237	0.011613	0.057442	2	2	2	0.00288	0.219743
ENSG00000131899.10	LLGL1	-2.52323	0.011628	0.002354	2	2	2	0.013584	0.07193
ENSG00000105383.14	CD33	2.52323	0.011628	0.014484	3	4	4	0.03792	0.274842
ENSG00000075568.16	TMEM131	-2.51798	0.011803	0.007987	2	2	2	0.009773	0.088061
ENSG00000065357.19	DGKA	-2.5162	0.011863	0.003441	1	1	1	0.011863	0.219758
ENSG00000114988.11	LMAN2L	2.51423	0.011929	0.012544	2	2	2	0.022113	0.141253
ENSG00000163728.10	TTC14	-2.51098	0.01204	0.001373	2	2	2	0.016304	0.084258
ENSG00000116133.11	DHCR24	2.50662	0.012189	0.013745	2	2	2	0.021422	0.147592
ENSG00000106392.10	C1GALT1	-2.50565	0.012223	0.073981	2	2	2	0.000199	0.344464
ENSG00000100395.14	L3MBTL2	-2.50492	0.012248	0.004034	1	1	1	0.012248	0.09255
ENSG00000173145.11	NOC3L	-2.49997	0.012421	3.7e-05	1	2	2	0.012421	0.015415
ENSG00000127561.14	SYNGR3	-2.49325	0.012658	0.020981	1	1	1	0.012658	0.260715
ENSG00000072818.11	ACAP1	2.49293	0.012669	0.025145	2	2	2	0.012359	0.264373
ENSG00000135108.14	FBXO21	2.49173	0.012712	0.00358	2	2	2	0.005807	0.060326
ENSG00000125510.15	OPRL1	2.48877	0.012819	0.018593	1	1	1	0.012819	0.1978
ENSG00000180875.4	GREM2	-2.48768	0.012858	0.018982	1	1	1	0.012858	0.189647
ENSG00000120645.11	IQSEC3	2.48617	0.012913	0.33999	1	1	1	0.012913	0.825209
ENSG00000125148.6	MT2A	2.48243	0.013049	0.007454	2	2	2	0.013428	0.132395
ENSG00000197694.15	SPTAN1	-2.47948	0.013157	0.000289	1	1	1	0.013157	0.028734
ENSG00000063176.15	SPHK2	2.47733	0.013237	0.004094	1	1	1	0.013237	0.147152
ENSG00000204524.6	ZNF805	2.47645	0.013269	0.001448	1	1	1	0.013269	0.056004
ENSG00000198556.13	ZNF789	-2.47433	0.013349	0.0003	2	2	2	0.045539	0.047963
ENSG00000153214.9	TMEM87B	-2.47426	0.013351	0.065818	4	4	4	0.036973	0.4943
ENSG00000173818.16	ENDOV	-2.46913	0.013544	0.040205	3	3	3	0.002431	0.304358
ENSG00000145604.15	SKP2	-2.46803	0.013586	0.013259	1	1	1	0.013586	0.266629
ENSG00000133561.15	GIMAP6	-2.46786	0.013592	0.001608	1	1	1	0.013592	0.066125
ENSG00000167103.11	PIP5KL1	2.46769	0.013599	0.118239	2	2	2	0.019896	0.490283
ENSG00000134575.9	ACP2	2.46561	0.013678	0.123446	3	3	3	0.00917	0.334602
ENSG00000154928.16	EPHB1	-2.46398	0.01374	0.001022	1	1	1	0.01374	0.046473
ENSG00000156042.17	CFAP70	-2.46351	0.013758	0.01841	1	1	1	0.013758	0.437605
ENSG00000138279.15	ANXA7	2.46063	0.013869	1.69e-07	1	1	1	0.013869	0.001264
ENSG00000110200.8	ANAPC15	2.45839	0.013956	0.006268	3	3	3	0.01903	0.164392
ENSG00000180066.9	C10orf91	2.45796	0.013973	0.129762	1	1	1	0.013973	2.3012
ENSG00000136908.17	DPM2	2.45658	0.014027	0.001972	1	1	1	0.014027	0.095336
ENSG00000167904.14	TMEM68	-2.45467	0.014101	0.011041	2	2	2	0.02622	0.233266
ENSG00000228800.1	RP11-253D19.1	-2.45423	0.014118	0.014128	2	2	2	0.017037	0.123974
ENSG00000115556.13	PLCD4	2.4518	0.014215	0.002324	1	1	1	0.014215	0.070613
ENSG00000106829.18	TLE4	-2.45176	0.014216	0.000257	1	1	1	0.014216	0.102352
ENSG00000138433.15	CIR1	-2.45102	0.014245	0.003116	2	2	2	0.005895	0.074726
ENSG00000107897.18	ACBD5	-2.4492	0.014317	9.01e-05	1	1	1	0.014317	0.03912
ENSG00000267321.2	LINC02001	-2.44475	0.014495	0.005698	2	2	2	0.008867	0.273347
ENSG00000254288.1	RP11-6I2.3	2.44237	0.014591	0.001592	1	1	1	0.014591	0.209471
ENSG00000165457.13	FOLR2	2.43872	0.014739	2.66e-05	1	2	2	0.014739	0.019033
ENSG00000161265.14	U2AF1L4	2.43848	0.014749	0.210568	4	4	4	0.023688	0.659411
ENSG00000175220.11	ARHGAP1	2.43332	0.014961	0.002925	2	2	2	0.02268	0.060674
ENSG00000143882.10	ATP6V1C2	2.43183	0.015023	0.011624	2	2	2	0.009945	0.1424
ENSG00000128604.19	IRF5	-2.4299	0.015103	0.089162	2	2	2	0.008431	0.387289
ENSG00000096384.19	HSP90AB1	-2.42965	0.015113	0.002327	2	2	2	0.012737	0.050634
ENSG00000179855.5	GIPC3	-2.42795	0.015184	0.057402	2	2	2	0.015187	0.566505
ENSG00000144199.11	FAHD2B	2.42543	0.01529	0.008594	1	1	1	0.01529	0.158968
ENSG00000151092.16	NGLY1	-2.42474	0.01532	0.001189	1	1	1	0.01532	0.056227
ENSG00000005483.20	KMT2E	2.42463	0.015324	0.000224	1	1	1	0.015324	0.022577
ENSG00000112651.11	MRPL2	-2.42354	0.01537	0.000839	1	1	1	0.01537	0.106949
ENSG00000164031.16	DNAJB14	2.4235	0.015372	9.71e-08	1	1	1	0.015372	0.001207
ENSG00000078246.16	TULP3	-2.423	0.015393	0.008875	2	2	2	0.020239	0.116872
ENSG00000122694.15	GLIPR2	2.4164	0.015675	0.000828	2	2	2	0.012601	0.042299
ENSG00000088305.18	DNMT3B	-2.41469	0.015749	8.14e-05	1	1	1	0.015749	0.040467
ENSG00000139053.2	PDE6H	-2.41281	0.01583	0.091879	3	3	3	0.010491	0.479453
ENSG00000135736.5	CCDC102A	-2.41002	0.015951	0.010103	2	2	2	0.052045	0.27682
ENSG00000005381.7	MPO	2.40987	0.015958	0.003118	1	1	1	0.015958	0.176282
ENSG00000188404.8	SELL	-2.40791	0.016044	0.01701	3	3	3	0.081077	0.147128
ENSG00000169047.5	IRS1	-2.40675	0.016095	0.023948	2	2	2	0.021451	0.46311
ENSG00000130592.15	LSP1	2.40436	0.016201	0.013431	6	6	6	0.009153	0.235068
ENSG00000129245.11	FXR2	-2.40311	0.016256	0.008506	1	1	1	0.016256	0.139959
ENSG00000182606.14	TRAK1	2.40217	0.016298	0.002318	2	2	2	0.045837	0.10018
ENSG00000152128.13	TMEM163	2.40176	0.016316	0.261548	2	2	2	0.003352	0.490195
ENSG00000066855.15	MTFR1	-2.40155	0.016326	0.028305	3	3	3	0.073277	0.280414
ENSG00000204657.3	OR2H2	2.40072	0.016363	0.011424	2	2	2	0.065041	0.241396
ENSG00000187626.8	ZKSCAN4	2.39913	0.016434	0.005503	1	1	1	0.016434	0.189405
ENSG00000104067.16	TJP1	2.3989	0.016444	5.52e-07	1	1	1	0.016444	0.003147
ENSG00000197081.12	IGF2R	-2.398	0.016485	0.000129	1	1	1	0.016485	0.028225
ENSG00000120053.10	GOT1	-2.39793	0.016488	0.000576	1	1	1	0.016488	0.065799
ENSG00000102710.19	SUPT20H	-2.39666	0.016545	0.046674	1	1	1	0.016545	0.524556
ENSG00000133030.20	MPRIP	-2.39581	0.016584	0.000466	1	2	2	0.016584	0.042273
ENSG00000254427.1	RP11-430H10.1	2.39552	0.016597	0.074511	2	2	2	0.025457	0.27199
ENSG00000186010.18	NDUFA13	-2.39476	0.016631	0.000983	1	1	1	0.016631	0.046295
ENSG00000082146.12	STRADB	-2.39465	0.016636	0.002798	1	1	1	0.016636	0.080176
ENSG00000085491.15	SLC25A24	2.38994	0.016851	0.022496	2	3	3	0.00633	0.20923
ENSG00000147535.16	PLPP5	-2.38966	0.016864	0.00046	2	2	2	0.008198	0.035269
ENSG00000114854.7	TNNC1	2.38862	0.016912	0.000973	2	2	2	0.013054	0.092788
ENSG00000173705.8	SUSD5	-2.38846	0.016919	0.007038	1	1	1	0.016919	0.2101
ENSG00000101019.21	UQCC1	2.3883	0.016927	0.027802	1	1	1	0.016927	0.238168
ENSG00000023171.16	GRAMD1B	-2.38815	0.016933	0.021029	2	2	2	0.01466	0.226404
ENSG00000135960.9	EDAR	2.38795	0.016942	0.000303	1	1	1	0.016942	0.089394
ENSG00000054118.13	THRAP3	-2.38739	0.016968	0.001193	1	1	1	0.016968	0.074777
ENSG00000178538.9	CA8	-2.38645	0.017012	0.022295	1	2	2	0.017012	0.219944
ENSG00000086288.11	NME8	2.38554	0.017054	0.032	3	3	3	0.002178	0.263017
ENSG00000242247.10	ARFGAP3	2.38417	0.017118	0.015867	2	2	2	0.018414	0.184296
ENSG00000198380.12	GFPT1	2.38202	0.017218	0.026885	3	3	3	0.001816	0.182259
ENSG00000135929.8	CYP27A1	2.3814	0.017247	0.070187	1	1	1	0.017247	0.371813
ENSG00000079332.14	SAR1A	-2.37972	0.017326	0.013023	2	3	3	0.018429	0.213998
ENSG00000165501.16	LRR1	2.37624	0.01749	0.147886	3	3	3	0.008451	0.33165
ENSG00000109536.11	FRG1	2.37605	0.017499	0.003795	1	2	2	0.017499	0.10168
ENSG00000149346.14	SLX4IP	-2.37461	0.017568	0.005883	1	1	1	0.017568	0.108809
ENSG00000196313.11	POM121	2.37142	0.01772	0.01837	3	4	4	0.021235	0.193682
ENSG00000106554.11	CHCHD3	2.37105	0.017738	0.002888	2	2	2	0.011431	0.085949
ENSG00000100297.15	MCM5	2.37032	0.017773	0.009876	1	1	1	0.017773	0.197489
ENSG00000084110.10	HAL	-2.36885	0.017843	0.003132	2	2	2	0.004265	0.081782
ENSG00000187566.5	NHLRC1	2.36613	0.017975	0.002042	2	2	2	0.026026	0.096014
ENSG00000073584.18	SMARCE1	2.36589	0.017987	0.009223	2	2	2	0.02564	0.100339
ENSG00000198125.12	MB	-2.36123	0.018214	1.92e-06	1	1	1	0.018214	0.003422
ENSG00000197417.7	SHPK	2.35756	0.018395	0.043616	4	4	4	0.022399	0.254564
ENSG00000283361.1	RP11-569D9.5	2.35641	0.018452	0.078853	1	2	2	0.018452	0.398414
ENSG00000085415.15	SEH1L	2.35605	0.018471	0.015659	2	2	2	0.068727	0.331753
ENSG00000274225.1	KB-68A7.1	-2.35512	0.018517	0.01509	1	1	1	0.018517	0.50431
ENSG00000165714.10	BORCS5	2.35499	0.018523	0.009011	4	4	4	0.055834	0.266345
ENSG00000105793.15	GTPBP10	-2.35408	0.018569	0.084715	5	5	5	0.099941	0.408335
ENSG00000105997.22	HOXA3	2.35277	0.018634	0.056234	2	2	2	0.041585	0.211303
ENSG00000129473.9	BCL2L2	2.35182	0.018682	0.001645	1	1	1	0.018682	0.176279
ENSG00000224397.5	SMIM25	-2.35107	0.018719	0.004778	2	2	2	0.026885	0.119921
ENSG00000175806.14	MSRA	2.34949	0.018799	0.002462	1	1	1	0.018799	0.0716
ENSG00000009790.14	TRAF3IP3	2.34874	0.018837	0.06532	2	2	2	0.084553	0.343091
ENSG00000058453.16	CROCC	2.34849	0.01885	0.041991	3	3	3	0.035734	0.276156
ENSG00000185043.10	CIB1	-2.34692	0.018929	0.178337	3	3	3	0.024313	0.391465
ENSG00000272086.1	CTD-2186M15.3	2.3437	0.019094	2.29e-06	1	2	2	0.019094	0.010017
ENSG00000072210.18	ALDH3A2	2.34227	0.019167	0.025589	3	3	3	0.023268	0.186332
ENSG00000090382.6	LYZ	-2.34209	0.019176	1.0705	2	2	2	0.013912	0.722802
ENSG00000144580.13	CNOT9	-2.34206	0.019178	0.14619	2	2	2	0.014734	0.295597
ENSG00000167106.11	FAM102A	2.34092	0.019236	0.004973	2	2	2	0.016683	0.137934
ENSG00000168234.12	TTC39C	-2.34081	0.019242	0.027321	1	1	1	0.019242	0.290613
ENSG00000166348.18	USP54	2.33982	0.019293	0.000841	1	1	1	0.019293	0.088564
ENSG00000124299.13	PEPD	2.33871	0.019351	4.54e-06	1	2	2	0.019351	0.004916
ENSG00000111775.2	COX6A1	2.33777	0.019399	0.000491	3	3	3	0.086386	0.040897
ENSG00000261353.1	CTA-14H9.5	-2.33546	0.01952	0.004042	1	2	2	0.01952	0.13692
ENSG00000108370.16	RGS9	2.33419	0.019586	0.003836	2	2	2	0.018245	0.131826
ENSG00000163083.5	INHBB	-2.33305	0.019645	0.00179	1	1	1	0.019645	0.065012
ENSG00000154429.10	CCSAP	-2.33225	0.019687	0.038413	3	3	3	0.016972	0.231598
ENSG00000130413.15	STK33	-2.33194	0.019704	0.128726	4	4	4	0.034492	0.550346
ENSG00000131473.16	ACLY	2.3287	0.019875	0.001781	2	2	2	0.019918	0.079897
ENSG00000186470.13	BTN3A2	-2.3238	0.020136	0.962204	3	3	3	0.016542	1.05381
ENSG00000115760.13	BIRC6	-2.3225	0.020206	0.000227	2	2	2	0.040402	0.027445
ENSG00000160233.7	LRRC3	-2.32106	0.020284	0.112913	3	3	3	0.018517	0.996202
ENSG00000115596.3	WNT6	2.32039	0.02032	0.001769	1	1	1	0.02032	0.05993
ENSG00000117834.12	SLC5A9	2.31988	0.020347	1.02e-05	1	1	1	0.020347	0.00676
ENSG00000154803.12	FLCN	2.31971	0.020357	0.029462	1	1	1	0.020357	0.249064
ENSG00000173207.12	CKS1B	2.3167	0.02052	3.25e-05	2	2	2	0.019846	0.008278
ENSG00000100528.11	CNIH1	-2.31385	0.020676	0.001275	2	2	2	0.062835	0.083344
ENSG00000117791.15	2025-03-02	2.31053	0.020859	0.249787	2	2	2	0.025206	0.466957
ENSG00000106034.17	CPED1	2.30863	0.020964	0.049517	1	1	1	0.020964	0.317513
ENSG00000175334.7	BANF1	-2.30718	0.021045	0.013076	2	2	2	0.010335	0.099301
ENSG00000126246.9	IGFLR1	-2.30705	0.021052	0.012636	3	3	3	0.016626	0.214473
ENSG00000189143.9	CLDN4	2.30687	0.021062	0.000847	1	1	1	0.021062	0.048389
ENSG00000197780.9	TAF13	2.30633	0.021092	0.011495	2	2	2	0.015742	0.152642
ENSG00000117419.14	ERI3	-2.30327	0.021264	4.52e-06	1	1	1	0.021264	0.009695
ENSG00000158480.10	SPATA2	2.29922	0.021493	0.002973	2	2	2	0.01961	0.0833
ENSG00000134717.17	BTF3L4	-2.29914	0.021497	5.13e-05	1	1	1	0.021497	0.022518
ENSG00000117862.11	TXNDC12	-2.29914	0.021497	0.018206	1	1	1	0.021497	0.424291
ENSG00000144115.16	THNSL2	-2.29867	0.021524	1.05233	4	4	4	0.026222	1.09302
ENSG00000139514.12	SLC7A1	2.29864	0.021526	1.49e-06	1	1	1	0.021526	0.004277
ENSG00000167083.6	GNGT2	-2.29538	0.021712	0.00402	1	1	1	0.021712	0.088973
ENSG00000047188.15	YTHDC2	-2.29524	0.021719	0.049768	2	2	2	0.01228	0.260309
ENSG00000110025.12	SNX15	-2.2944	0.021768	0.029461	1	1	1	0.021768	0.258692
ENSG00000139438.5	FAM222A	2.29254	0.021875	0.00191	2	2	2	0.010345	0.121634
ENSG00000198894.7	CIPC	2.29178	0.021918	0.027827	2	3	3	0.012012	0.15474
ENSG00000090013.9	BLVRB	-2.29001	0.022021	0.000721	1	2	2	0.022021	0.147911
ENSG00000068654.15	POLR1A	-2.28962	0.022043	0.012648	2	2	2	0.025532	0.190262
ENSG00000205517.12	RGL3	2.28889	0.022086	0.032354	1	2	2	0.022086	0.454202
ENSG00000110446.10	SLC15A3	-2.28831	0.022119	0.005025	2	2	2	0.026489	0.124006
ENSG00000125971.16	DYNLRB1	2.28755	0.022164	1.96e-05	1	1	1	0.022164	0.00683
ENSG00000143549.19	TPM3	-2.28553	0.022282	0.007583	2	2	2	0.002605	0.165576
ENSG00000168026.18	TTC21A	-2.28354	0.022399	0.018946	2	2	2	0.051866	0.196343
ENSG00000161011.19	SQSTM1	-2.28305	0.022428	0.001168	2	3	3	0.02811	0.064418
ENSG00000118181.10	RPS25	-2.28175	0.022504	0.002342	2	2	2	0.022738	0.121211
ENSG00000129933.20	MAU2	2.28086	0.022557	0.011988	3	3	3	0.010489	0.152261
ENSG00000267796.7	LIN37	2.27853	0.022695	0.004358	1	1	1	0.022695	0.129228
ENSG00000010282.14	HHATL	2.27693	0.02279	0.004695	1	1	1	0.02279	0.093314
ENSG00000255274.9	TMPRSS4-AS1	2.27633	0.022826	0.01983	1	1	1	0.022826	0.190911
ENSG00000156564.8	LRFN2	2.27585	0.022855	0.055579	2	2	2	0.011762	0.310624
ENSG00000149231.11	CCDC82	-2.27393	0.02297	0.008109	1	1	1	0.02297	0.186883
ENSG00000158106.13	RHPN1	2.27083	0.023157	0.01796	2	2	2	0.003175	0.29837
ENSG00000118137.9	APOA1	2.2697	0.023226	9.62e-05	1	1	1	0.023226	0.034617
ENSG00000162694.13	EXTL2	-2.26897	0.02327	0.033374	2	2	2	0.02685	0.271879
ENSG00000153283.12	CD96	2.26687	0.023399	0.00207	1	1	1	0.023399	0.071464
ENSG00000133935.6	C14orf1	2.26592	0.023456	0.001397	2	2	2	0.002916	0.098245
ENSG00000175513.9	TSGA10IP	-2.26439	0.02355	0.002518	1	1	1	0.02355	0.074316
ENSG00000119723.16	COQ6	-2.26391	0.023579	0.018217	3	3	3	0.006313	0.243154
ENSG00000182934.11	SRPRA	-2.26294	0.023639	0.000133	1	1	1	0.023639	0.019432
ENSG00000143595.12	AQP10	2.26278	0.023649	0.027821	4	4	4	0.04565	0.257564
ENSG00000159648.11	TEPP	-2.26263	0.023659	0.061007	2	2	2	0.018724	0.481525
ENSG00000177731.15	FLII	-2.26239	0.023674	0.000497	1	2	2	0.023674	0.03321
ENSG00000117139.16	KDM5B	-2.26195	0.023701	0.00197	2	3	3	0.031769	0.099654
ENSG00000113658.16	SMAD5	-2.26177	0.023712	0.029808	1	2	2	0.023712	0.256162
ENSG00000170545.16	SMAGP	-2.26151	0.023728	0.005496	2	2	2	0.038133	0.119753
ENSG00000137414.5	FAM8A1	2.25918	0.023872	0.005062	2	2	2	0.011525	0.087475
ENSG00000213551.4	DNAJC9	-2.25687	0.024016	0.000576	1	1	1	0.024016	0.07242
ENSG00000188818.12	ZDHHC11	-2.25625	0.024055	0.015647	2	4	4	0.040468	0.151138
ENSG00000088298.12	EDEM2	2.25576	0.024086	0.021398	2	2	2	0.024525	0.150426
ENSG00000106631.8	MYL7	2.25552	0.024101	0.000306	1	1	1	0.024101	0.059879
ENSG00000115761.15	NOL10	-2.25433	0.024176	0.0005	1	1	1	0.024176	0.083176
ENSG00000197506.7	SLC28A3	2.25161	0.024347	0.068979	2	2	2	0.016202	0.64208
ENSG00000143457.10	GOLPH3L	-2.2508	0.024398	0.012357	1	1	1	0.024398	0.158577
ENSG00000171222.10	SCAND1	-2.24861	0.024537	0.003139	2	2	2	0.008114	0.123152
ENSG00000175213.2	ZNF408	2.24806	0.024573	0.000834	2	2	2	0.02268	0.044334
ENSG00000078674.17	PCM1	2.24659	0.024666	0.019065	2	2	2	0.021707	0.239475
ENSG00000070495.14	JMJD6	-2.24631	0.024684	0.009995	1	1	1	0.024684	0.138948
ENSG00000155621.14	C9orf85	2.24551	0.024735	0.000334	1	2	2	0.024735	0.075336
ENSG00000164082.14	GRM2	2.24533	0.024747	0.022182	2	2	2	0.027038	0.277102
ENSG00000178372.7	CALML5	2.24453	0.024799	0.00357	2	2	2	0.02282	0.165506
ENSG00000100650.15	SRSF5	-2.24432	0.024812	2.14e-07	1	1	1	0.024812	0.002192
ENSG00000157856.10	DRC1	-2.24416	0.024822	0.024291	2	2	2	0.031476	0.364206
ENSG00000074356.16	NCBP3	-2.24409	0.024827	0.018664	2	2	2	0.024221	0.213973
ENSG00000197208.5	SLC22A4	-2.24258	0.024924	0.007605	2	2	2	0.041091	0.076218
ENSG00000163141.18	BNIPL	-2.24111	0.025019	0.016326	2	2	2	0.028802	0.158363
ENSG00000099977.13	DDT	-2.24044	0.025062	0.13795	2	3	3	0.049397	0.42083
ENSG00000132718.8	SYT11	-2.2399	0.025097	0.008592	1	1	1	0.025097	0.149277
ENSG00000257556.1	RP11-44N21.1	-2.2397	0.02511	0.002785	2	2	2	0.027543	0.105829
ENSG00000175376.8	EIF1AD	2.23853	0.025187	0.00032	2	2	2	0.024563	0.086225
ENSG00000215187.10	FAM166B	-2.23837	0.025197	0.003879	1	1	1	0.025197	0.200879
ENSG00000267194.1	RP1-193H18.2	-2.23817	0.02521	0.004252	2	2	2	0.024392	0.094424
ENSG00000275703.1	U47924.32	2.2376	0.025247	0.005988	1	1	1	0.025247	0.118439
ENSG00000147548.16	NSD3	-2.23622	0.025337	0.000268	2	2	2	0.007068	0.025293
ENSG00000177432.6	NAP1L5	2.23566	0.025374	0.000412	1	1	1	0.025374	0.058036
ENSG00000243819.4	RN7SL832P	-2.23443	0.025455	0.008961	1	1	1	0.025455	0.14182
ENSG00000167775.10	CD320	-2.23337	0.025524	0.007729	4	5	5	0.091173	0.259721
ENSG00000175315.2	CST6	2.23319	0.025536	0.00352	1	1	1	0.025536	0.355165
ENSG00000182923.16	CEP63	-2.23294	0.025553	0.034269	2	2	2	0.052559	0.365891
ENSG00000131018.22	SYNE1	-2.23183	0.025626	0.006697	1	1	1	0.025626	0.117662
ENSG00000115541.10	HSPE1	2.23056	0.025711	1.71e-06	1	1	1	0.025711	0.002029
ENSG00000171401.14	KRT13	-2.23034	0.025725	0.00031	1	1	1	0.025725	0.059861
ENSG00000228223.2	HCG11	2.2301	0.025741	0.007311	1	1	1	0.025741	0.177453
ENSG00000241657.1	TRBV11-2	-2.22937	0.025789	0.020193	1	1	1	0.025789	0.20947
ENSG00000272369.1	RP11-446N19.1	2.2292	0.025801	0.041063	1	1	1	0.025801	0.313755
ENSG00000163482.11	STK36	-2.22914	0.025805	0.004496	2	2	2	0.006852	0.151515
ENSG00000013288.8	MAN2B2	-2.22878	0.025829	0.071522	3	3	3	0.030849	0.388036
ENSG00000185813.10	PCYT2	-2.2282	0.025867	0.000513	1	1	1	0.025867	0.094263
ENSG00000166946.13	CCNDBP1	-2.22784	0.025891	0.000516	1	1	1	0.025891	0.034263
ENSG00000155561.14	NUP205	2.22541	0.026054	0.000147	1	2	2	0.026054	0.0173
ENSG00000135913.10	USP37	2.22187	0.026292	0.008062	2	2	2	0.014847	0.146598
ENSG00000272092.1	RP11-350N15.5	-2.22173	0.026302	0.024962	2	2	2	0.011413	0.25548
ENSG00000113384.13	GOLPH3	2.22041	0.026391	0.002091	3	3	3	0.019094	0.239436
ENSG00000157570.11	TSPAN18	2.21958	0.026448	0.000979	1	1	1	0.026448	0.097081
ENSG00000137574.10	TGS1	-2.21909	0.02648	0.015831	1	1	1	0.02648	0.286337
ENSG00000136100.12	VPS36	-2.21868	0.026508	0.00468	2	2	2	0.076896	0.181951
ENSG00000156471.12	PTDSS1	2.21821	0.026541	0.004611	3	3	3	0.005715	0.25088
ENSG00000186716.20	BCR	-2.21821	0.026541	0.06564	3	3	3	0.064223	0.23016
ENSG00000163535.17	SGO2	-2.2138	0.026842	0.002444	2	2	2	0.003521	0.131415
ENSG00000160214.12	RRP1	2.21287	0.026907	0.004531	3	3	3	0.022331	0.096695
ENSG00000141744.3	PNMT	2.21259	0.026926	0.013573	1	1	1	0.026926	0.170111
ENSG00000178201.4	VN1R1	-2.21235	0.026943	0.054559	2	2	2	0.037763	0.342744
ENSG00000228340.5	MIR646HG	2.21224	0.02695	0.020938	3	4	4	0.120019	0.1763
ENSG00000127081.13	ZNF484	-2.21156	0.026997	0.00233	2	2	2	0.045691	0.069133
ENSG00000086598.10	TMED2	2.21128	0.027017	0.001188	2	2	2	0.048536	0.049371
ENSG00000151458.11	ANKRD50	2.20953	0.027137	0.020685	3	3	3	0.011802	0.268539
ENSG00000014123.9	UFL1	2.20783	0.027256	0.003405	2	3	3	0.001685	0.171072
ENSG00000171130.17	ATP6V0E2	-2.20754	0.027277	0.042552	2	2	2	0.018392	0.669922
ENSG00000198171.12	DDRGK1	-2.20716	0.027303	0.026303	3	3	3	0.025019	0.197943
ENSG00000141030.12	COPS3	2.20707	0.027309	0.055832	2	2	2	0.02432	0.357281
ENSG00000115107.19	STEAP3	2.20678	0.027329	0.238515	4	4	4	0.05546	0.287563
ENSG00000132561.13	MATN2	-2.20378	0.02754	0.107438	3	3	3	0.036513	1.02839
ENSG00000007944.14	MYLIP	2.20339	0.027567	0.002382	2	2	2	0.033653	0.085476
ENSG00000159733.13	ZFYVE28	-2.20084	0.027747	0.012383	3	3	3	0.031695	0.159504
ENSG00000084636.17	COL16A1	2.1984	0.02792	0.000213	2	2	2	0.031835	0.032277
ENSG00000123453.17	SARDH	-2.1963	0.028071	0.164575	3	3	3	0.024492	0.453089
ENSG00000105676.13	ARMC6	-2.19594	0.028096	0.003356	1	1	1	0.028096	0.090092
ENSG00000197375.12	SLC22A5	-2.19517	0.028151	0.193396	3	3	3	0.045011	0.451456
ENSG00000187736.12	NHEJ1	2.19513	0.028154	0.028154	2	2	2	0.043347	0.233689
ENSG00000153823.18	PID1	2.19394	0.02824	0.00377	1	1	1	0.02824	0.123064
ENSG00000104889.5	RNASEH2A	-2.19304	0.028305	0.002065	3	3	3	0.03354	0.081726
ENSG00000161048.11	NAPEPLD	-2.19269	0.02833	0.000128	1	2	2	0.02833	0.053718
ENSG00000241945.7	PWP2	-2.19056	0.028483	0.791512	3	3	3	0.007212	1.37786
ENSG00000113810.15	SMC4	2.18958	0.028555	0.003515	2	2	2	0.028819	0.092719
ENSG00000162613.16	FUBP1	-2.18949	0.028562	0.000737	2	2	2	0.027282	0.063896
ENSG00000010626.14	LRRC23	-2.18776	0.028687	0.336854	2	2	2	0.023014	0.475375
ENSG00000167491.17	GATAD2A	-2.18438	0.028934	0.0144	1	1	1	0.028934	0.176709
ENSG00000178878.12	APOLD1	2.18424	0.028945	0.167469	2	2	2	0.004859	0.394838
ENSG00000118640.10	VAMP8	2.18403	0.02896	0.002672	2	2	2	0.027298	0.107748
ENSG00000185022.11	MAFF	-2.18035	0.029231	0.009484	2	2	2	0.03455	0.098903
ENSG00000187193.8	MT1X	-2.1784	0.029377	0.013137	2	2	2	0.009596	0.145958
ENSG00000143183.16	TMCO1	-2.17613	0.029545	0.000848	2	2	2	0.10728	0.073606
ENSG00000153896.17	ZNF599	-2.17593	0.029561	0.011601	2	2	2	0.01538	0.503996
ENSG00000137675.4	MMP27	-2.17224	0.029838	0.065764	3	3	3	0.000991	0.317534
ENSG00000162944.10	RFTN2	2.17207	0.029851	0.000117	1	1	1	0.029851	0.033779
ENSG00000182578.13	CSF1R	2.17151	0.029892	9.26e-05	1	1	1	0.029892	0.014364
ENSG00000148396.18	SEC16A	-2.17132	0.029907	0.143765	2	4	4	0.046229	0.327978
ENSG00000168813.16	ZNF507	-2.17114	0.029921	0.002354	2	2	2	0.053119	0.11035
ENSG00000071242.11	RPS6KA2	2.16944	0.030049	0.059113	2	2	2	0.036543	0.471792
ENSG00000186230.6	ZNF749	2.16806	0.030154	0.302816	1	1	1	0.030154	0.79162
ENSG00000116544.11	DLGAP3	2.16748	0.030198	6.12e-05	1	1	1	0.030198	0.028882
ENSG00000198648.10	STK39	2.16459	0.030419	0.000964	1	1	1	0.030419	0.065999
ENSG00000224934.2	RP11-441O15.3	-2.16388	0.030474	0.051408	2	2	2	0.016488	0.271852
ENSG00000079805.16	DNM2	2.16376	0.030483	0.000804	2	2	2	0.055627	0.100542
ENSG00000118939.17	UCHL3	-2.16369	0.030488	0.002123	1	1	1	0.030488	0.069377
ENSG00000141380.13	SS18	2.1631	0.030534	0.006456	2	2	2	0.045749	0.15091
ENSG00000080802.18	CNOT4	2.16294	0.030546	0.000129	1	1	1	0.030546	0.024003
ENSG00000256576.2	RP13-977J11.2	-2.16259	0.030573	0.244109	4	4	4	0.019414	0.473709
ENSG00000106348.16	IMPDH1	2.16213	0.030609	0.000146	2	2	2	0.069933	0.027549
ENSG00000247157.6	LINC01252	2.16154	0.030653	0.249609	2	2	2	0.030618	0.703772
ENSG00000197969.11	VPS13A	-2.161	0.030695	0.012676	3	3	3	0.118354	0.167954
ENSG00000115896.15	PLCL1	2.16088	0.030705	0.068827	1	1	1	0.030705	0.393992
ENSG00000146425.10	DYNLT1	2.16053	0.030732	0.007374	2	2	2	0.036284	0.119806
ENSG00000136104.19	RNASEH2B	2.15887	0.03086	0.029358	2	2	2	0.026445	0.799102
ENSG00000166896.7	ATP23	2.15718	0.030992	0.860471	2	2	2	0.025569	0.801186
ENSG00000118894.14	EEF2KMT	2.15715	0.030994	0.00179	1	1	1	0.030994	0.132061
ENSG00000105135.15	ILVBL	-2.15637	0.031055	0.001058	2	2	2	0.019471	0.114305
ENSG00000141458.12	NPC1	2.15624	0.031065	0.004932	2	2	2	0.011173	0.106027
ENSG00000134324.11	LPIN1	2.15601	0.031083	0.021641	2	2	2	0.030996	0.21007
ENSG00000109111.14	SUPT6H	-2.15368	0.031265	0.000164	1	1	1	0.031265	0.020625
ENSG00000213066.11	FGFR1OP	-2.15204	0.031395	0.016455	2	2	2	0.046104	0.178371
ENSG00000213145.9	CRIP1	-2.15115	0.031465	5.88e-05	1	1	1	0.031465	0.038532
ENSG00000196890.4	HIST3H2BB	-2.15005	0.031552	0.001139	2	2	2	0.033819	0.058801
ENSG00000131470.14	PSMC3IP	2.14846	0.031677	0.004082	1	1	1	0.031677	0.102681
ENSG00000166840.13	GLYATL1	2.14793	0.031719	5.81e-06	1	1	1	0.031719	0.005285
ENSG00000155508.13	CNOT8	2.14748	0.031755	0.001539	1	1	1	0.031755	0.178863
ENSG00000182247.9	UBE2E2	-2.14674	0.031814	0.015827	3	3	3	0.01393	0.165909
ENSG00000251136.8	RP11-37B2.1	2.14429	0.032009	0.136939	3	3	3	0.030319	0.401418
ENSG00000272468.1	RP1-86C11.7	-2.14391	0.03204	0.000193	1	1	1	0.03204	0.025871
ENSG00000131845.14	ZNF304	2.14363	0.032062	0.026069	1	2	2	0.032062	0.236538
ENSG00000120697.8	ALG5	2.14303	0.032111	0.001374	2	2	2	0.030517	0.086583
ENSG00000177427.12	MIEF2	-2.14264	0.032142	0.007163	2	2	2	0.035317	0.126351
ENSG00000165416.14	SUGT1	-2.14071	0.032297	0.011919	2	2	2	0.077596	0.221834
ENSG00000157343.8	ARMC12	-2.14054	0.032311	0.000606	1	1	1	0.032311	0.045562
ENSG00000133627.17	ACTR3B	-2.14051	0.032313	0.015149	1	1	1	0.032313	0.174745
ENSG00000161010.14	MRNIP	2.14048	0.032316	0.004777	1	1	1	0.032316	0.287615
ENSG00000143222.11	UFC1	2.13965	0.032383	0.006811	1	1	1	0.032383	0.382873
ENSG00000155016.17	CYP2U1	2.13952	0.032394	0.014736	2	2	2	0.002422	0.522411
ENSG00000092036.18	HAUS4	-2.13724	0.032578	0.032215	2	3	3	0.04217	0.294625
ENSG00000104979.8	C19orf53	2.13485	0.032773	0.001016	1	2	2	0.032773	0.046004
ENSG00000069849.10	ATP1B3	2.13478	0.032779	0.005482	1	2	2	0.032779	0.119594
ENSG00000107957.16	SH3PXD2A	2.13473	0.032783	0.007047	1	1	1	0.032783	0.126164
ENSG00000178982.9	EIF3K	-2.13399	0.032844	0.001803	1	1	1	0.032844	0.112934
ENSG00000010270.13	STARD3NL	2.13398	0.032845	0.007645	2	2	2	0.007473	0.102917
ENSG00000125505.16	MBOAT7	-2.13318	0.03291	0.00039	1	1	1	0.03291	0.03177
ENSG00000161692.17	DBF4B	-2.13208	0.033001	0.199204	4	4	4	0.033279	0.863442
ENSG00000136824.18	SMC2	2.1318	0.033023	0.012159	3	3	3	0.019329	0.090978
ENSG00000164182.10	NDUFAF2	2.13114	0.033078	0.00435	2	2	2	0.03363	0.093201
ENSG00000149428.18	HYOU1	-2.12968	0.033198	1.22e-05	2	2	2	0.08426	0.006524
ENSG00000091127.13	PUS7	2.12874	0.033275	0.032178	2	2	2	0.045654	0.216452
ENSG00000127578.6	WFIKKN1	-2.12826	0.033316	0.058675	3	3	3	0.035657	0.416599
ENSG00000272791.1	RP11-464F9.22	-2.12824	0.033317	0.000851	1	1	1	0.033317	0.105945
ENSG00000111845.4	PAK1IP1	-2.12803	0.033334	0.001906	1	1	1	0.033334	0.182352
ENSG00000083223.17	ZCCHC6	2.12485	0.033599	0.001274	1	1	1	0.033599	0.052224
ENSG00000107020.9	PLGRKT	2.1237	0.033696	0.019119	3	3	3	0.011023	0.190746
ENSG00000048740.18	CELF2	-2.12332	0.033727	6.62e-06	2	2	2	0.035797	0.004209
ENSG00000128891.15	C15orf57	2.12252	0.033794	0.19837	2	2	2	0.00889	0.416007
ENSG00000151224.12	MAT1A	2.12235	0.033808	2.53e-09	1	1	1	0.033808	0.000144
ENSG00000181218.5	HIST3H2A	2.12222	0.033819	0.001896	1	1	1	0.033819	0.076416
ENSG00000063015.19	SEZ6	-2.12186	0.03385	2.41e-06	1	1	1	0.03385	0.002909
ENSG00000183520.11	UTP11	-2.12176	0.033858	0.010328	1	1	1	0.033858	0.140387
ENSG00000152455.15	SUV39H2	2.12164	0.033868	0.000241	1	1	1	0.033868	0.06772
ENSG00000036448.9	MYOM2	2.12145	0.033884	1.06667	4	4	4	0.00622	1.38908
ENSG00000168275.14	COA6	-2.12082	0.033937	0.080768	3	3	3	0.037398	0.364153
ENSG00000140416.19	TPM1	-2.12046	0.033967	0.001182	1	1	1	0.033967	0.049993
ENSG00000185614.4	FAM212A	-2.12008	0.033999	0.000291	1	1	1	0.033999	0.085783
ENSG00000273356.1	LINC02019	-2.11937	0.034059	0.015969	1	1	1	0.034059	0.270771
ENSG00000143452.15	HORMAD1	-2.11906	0.034086	0.009406	1	1	1	0.034086	0.138769
ENSG00000180210.14	F2	2.11742	0.034224	0.004409	1	1	1	0.034224	0.131457
ENSG00000005961.17	ITGA2B	-2.11623	0.034325	0.000183	1	1	1	0.034325	0.020062
ENSG00000188779.10	SKOR1	-2.11413	0.034505	0.016245	1	1	1	0.034505	0.200663
ENSG00000177595.17	PIDD1	2.1133	0.034575	0.015575	2	2	2	0.031208	0.179583
ENSG00000182400.14	TRAPPC6B	2.1086	0.034979	0.001859	2	2	2	0.058538	0.086169
ENSG00000135525.18	MAP7	2.10783	0.035046	0.060463	1	1	1	0.035046	1.01322
ENSG00000134758.13	RNF138	2.10685	0.03513	0.005157	2	2	2	0.029515	0.103943
ENSG00000272555.1	RP11-459I19.1	2.10618	0.035189	0.030712	1	1	1	0.035189	0.24988
ENSG00000111348.8	ARHGDIB	-2.10385	0.035392	3e-05	1	1	1	0.035392	0.007812
ENSG00000005471.15	ABCB4	2.10215	0.03554	0.004719	2	2	2	0.049425	0.105439
ENSG00000114742.13	WDR48	-2.10097	0.035644	0.001825	1	1	1	0.035644	0.091914
ENSG00000111196.9	MAGOHB	-2.09918	0.035801	0.003938	1	1	1	0.035801	0.182042
ENSG00000141076.17	UTP4	-2.09846	0.035865	0.012735	1	1	1	0.035865	0.424247
ENSG00000106638.15	TBL2	2.09836	0.035873	0.019293	2	2	2	0.086336	0.412651
ENSG00000164818.15	DNAAF5	-2.09742	0.035957	0.027636	1	1	1	0.035957	0.231669
ENSG00000100813.14	ACIN1	2.09725	0.035971	0.000949	2	2	2	0.0148	0.056241
ENSG00000117133.10	RPF1	-2.09691	0.036001	0.004838	2	2	2	0.082309	0.301866
ENSG00000112667.12	DNPH1	2.09672	0.036018	0.017555	2	2	2	0.016875	0.314082
ENSG00000264490.3	WI2-87327B8.1	-2.09596	0.036086	0.007953	2	2	2	0.014847	0.114716
ENSG00000004777.18	ARHGAP33	2.09568	0.036111	0.036958	2	2	2	0.019279	0.165774
ENSG00000131730.15	CKMT2	-2.09498	0.036172	0.002714	2	2	2	0.023428	0.102515
ENSG00000170558.8	CDH2	2.09498	0.036173	0.03085	1	1	1	0.036173	0.290162
ENSG00000163382.11	NAXE	-2.09323	0.036329	0.008265	2	3	3	0.059746	0.173694
ENSG00000177873.12	ZNF619	-2.09309	0.036341	0.008601	1	1	1	0.036341	0.140555
ENSG00000104341.16	LAPTM4B	-2.09116	0.036513	0.006798	1	2	2	0.036513	0.315726
ENSG00000167962.13	ZNF598	-2.08981	0.036634	0.000109	1	1	1	0.036634	0.029662
ENSG00000171476.21	HOPX	-2.08884	0.036722	0.013755	2	2	2	0.03857	0.253001
ENSG00000129055.12	ANAPC13	-2.08875	0.03673	0.056445	1	1	1	0.03673	0.358317
ENSG00000188549.12	C15orf52	-2.0883	0.036771	0.001713	1	1	1	0.036771	0.115162
ENSG00000164081.12	TEX264	2.08819	0.03678	0.004183	1	1	1	0.03678	0.122478
ENSG00000249476.1	CTD-2587M2.1	-2.08706	0.036883	0.124239	3	3	3	0.028048	0.452994
ENSG00000134809.8	TIMM10	-2.08465	0.037101	0.09014	2	2	2	0.039079	0.312897
ENSG00000115524.15	SF3B1	2.08429	0.037134	0.000441	1	1	1	0.037134	0.032595
ENSG00000064607.16	SUGP2	2.0832	0.037233	0.000868	2	2	2	0.064065	0.071672
ENSG00000152684.10	PELO	2.08285	0.037265	0.04059	3	3	3	0.015188	0.642096
ENSG00000108106.13	UBE2S	2.08232	0.037313	0.000414	2	2	2	0.04249	0.029945
ENSG00000261308.2	FIGNL2	2.0819	0.037352	0.000755	1	1	1	0.037352	0.045519
ENSG00000196372.12	ASB13	2.08151	0.037387	0.015251	4	4	4	0.011552	0.226378
ENSG00000182180.13	MRPS16	2.08099	0.037435	0.003274	2	2	2	0.017152	0.166041
ENSG00000116584.17	ARHGEF2	-2.08023	0.037505	4.28e-07	1	1	1	0.037505	0.000968
ENSG00000178053.17	MLF1	2.07939	0.037582	0.025236	2	2	2	0.020205	0.193222
ENSG00000060688.12	SNRNP40	-2.07693	0.037808	0.00079	1	1	1	0.037808	0.135783
ENSG00000188038.7	NRN1L	2.07634	0.037862	0.005635	1	1	1	0.037862	0.289636
ENSG00000170477.12	KRT4	2.07246	0.038223	1.64e-05	1	1	1	0.038223	0.007425
ENSG00000144597.13	EAF1	-2.0724	0.038228	0.005371	1	1	1	0.038228	0.105513
ENSG00000170876.7	TMEM43	2.07239	0.038229	0.002465	1	2	2	0.038229	0.080116
ENSG00000153253.16	SCN3A	-2.07076	0.038382	0.000662	1	1	1	0.038382	0.048412
ENSG00000065717.14	TLE2	2.0701	0.038443	0.003835	2	2	2	0.038674	0.092315
ENSG00000147689.16	FAM83A	-2.06985	0.038466	0.018186	1	1	1	0.038466	0.349698
ENSG00000106701.11	FSD1L	2.06842	0.038601	0.005699	1	1	1	0.038601	0.11161
ENSG00000182600.9	C2orf82	2.06814	0.038627	0.001796	1	1	1	0.038627	0.212232
ENSG00000182993.3	C12orf60	2.06803	0.038638	0.012271	2	2	2	0.0391	0.166305
ENSG00000110092.3	CCND1	-2.06654	0.038777	3.52e-06	2	2	2	0.041943	0.009875
ENSG00000053702.14	NRIP2	2.06497	0.038926	0.000293	2	2	2	0.049917	0.033433
ENSG00000121057.12	AKAP1	2.06085	0.039317	0.002621	2	2	2	0.063576	0.108872
ENSG00000232125.2	DYTN	-2.05816	0.039575	0.016536	1	1	1	0.039575	0.202692
ENSG00000136371.10	MTHFS	2.05804	0.039586	0.018605	2	3	3	0.079042	0.125568
ENSG00000163564.14	PYHIN1	-2.05734	0.039654	0.003972	3	3	3	0.090882	0.05797
ENSG00000106004.4	HOXA5	2.0566	0.039724	0.011911	2	2	2	0.041585	0.150552
ENSG00000164880.15	INTS1	2.05656	0.039729	0.207732	2	2	2	0.015351	0.375239
ENSG00000226029.1	LINC01772	-2.05501	0.039878	0.100022	3	3	3	0.024371	0.424933
ENSG00000082701.14	GSK3B	2.05398	0.039978	0.005973	3	3	3	0.014425	0.075512
ENSG00000175221.14	MED16	-2.05393	0.039982	0.117901	3	4	4	0.031099	0.305416
ENSG00000166823.5	MESP1	-2.0539	0.039985	0.006936	2	2	2	0.026176	0.243646
ENSG00000112695.11	COX7A2	-2.0527	0.040102	0.00027	2	2	2	0.03815	0.026842
ENSG00000152127.8	MGAT5	2.05174	0.040194	0.00803	1	1	1	0.040194	0.177348
ENSG00000152804.10	HHEX	-2.05137	0.040231	0.001792	2	2	2	0.022967	0.110074
ENSG00000104613.11	INTS10	-2.04986	0.040378	0.016142	2	2	2	0.040445	0.178885
ENSG00000175183.9	CSRP2	2.04922	0.040441	6.56e-05	1	1	1	0.040441	0.013427
ENSG00000177842.11	ZNF620	-2.04897	0.040465	0.000454	1	1	1	0.040465	0.032287
ENSG00000117411.16	B4GALT2	2.04893	0.040469	0.001816	2	2	2	0.040038	0.095646
ENSG00000124615.17	MOCS1	2.04859	0.040502	0.050695	1	1	1	0.040502	1.55074
ENSG00000106246.17	PTCD1	-2.04822	0.040539	0.002028	1	1	1	0.040539	0.108796
ENSG00000106341.10	PPP1R17	-2.04731	0.040627	0.092924	2	2	2	0.048585	0.569038
ENSG00000204498.10	NFKBIL1	-2.04591	0.040766	0.00135	1	2	2	0.040766	0.143994
ENSG00000062282.14	DGAT2	2.04551	0.040805	0.002654	1	1	1	0.040805	0.12417
ENSG00000134909.18	ARHGAP32	2.04452	0.040902	0.001749	2	2	2	0.093506	0.07591
ENSG00000160882.11	CYP11B1	2.04265	0.041087	1.56e-06	1	2	2	0.041087	0.008613
ENSG00000181652.19	ATG9B	-2.04257	0.041095	0.004295	2	2	2	0.039	0.123684
ENSG00000131400.7	NAPSA	-2.04232	0.041119	0.019441	1	1	1	0.041119	0.203693
ENSG00000183431.11	SF3A3	-2.04088	0.041262	0.71621	4	4	4	0.033858	0.689268
ENSG00000036257.12	CUL3	2.0395	0.0414	0.001234	1	1	1	0.0414	0.048879
ENSG00000256582.1	RP11-75L1.1	2.03849	0.041501	0.01643	1	1	1	0.041501	0.189756
ENSG00000105501.12	SIGLEC5	-2.03782	0.041568	0.01411	4	4	4	0.020365	0.210714
ENSG00000167769.4	ACER1	-2.03732	0.041618	8.12e-06	1	1	1	0.041618	0.004443
ENSG00000187486.5	KCNJ11	2.03646	0.041705	0.009284	1	1	1	0.041705	0.13526
ENSG00000166822.12	TMEM170A	-2.03574	0.041776	0.003298	2	2	2	0.061512	0.102437
ENSG00000131375.9	CAPN7	2.03456	0.041896	0.000737	1	1	1	0.041896	0.054933
ENSG00000127507.17	ADGRE2	2.03423	0.041928	0.131326	4	4	4	0.056845	0.284734
ENSG00000074582.12	BCS1L	-2.03366	0.041986	0.001004	1	1	1	0.041986	0.04592
ENSG00000277587.1	CTD-3116E22.8	-2.03352	0.042	0.146966	2	2	2	0.027022	0.406811
ENSG00000244219.6	GS1-259H13.2	-2.03151	0.042203	0.00932	1	1	1	0.042203	0.231676
ENSG00000106459.14	NRF1	-2.02898	0.04246	0.001484	1	1	1	0.04246	0.094233
ENSG00000143155.12	TIPRL	-2.02818	0.042542	0.009613	2	2	2	0.073583	0.253863
ENSG00000120158.11	RCL1	-2.02751	0.042611	0.001859	1	1	1	0.042611	0.062547
ENSG00000108443.13	RPS6KB1	-2.02723	0.042639	0.002987	1	1	1	0.042639	0.079336
ENSG00000136783.9	NIPSNAP3A	-2.027	0.042663	0.03631	3	3	3	0.015966	0.236563
ENSG00000162415.6	ZSWIM5	2.02573	0.042792	0.00011	1	1	1	0.042792	0.015829
ENSG00000158691.14	ZSCAN12	-2.02564	0.042802	0.000233	2	2	2	0.029666	0.035215
ENSG00000169715.14	MT1E	2.02541	0.042825	0.110686	3	3	3	0.096672	0.338892
ENSG00000130479.10	MAP1S	-2.02523	0.042844	0.006027	3	3	3	0.073472	0.152194
ENSG00000164764.10	SBSPON	2.02509	0.042858	0.003888	1	1	1	0.042858	0.105774
ENSG00000182983.14	ZNF662	2.02487	0.042881	0.000335	1	1	1	0.042881	0.033823
ENSG00000221909.2	FAM200A	2.02448	0.042921	5.26e-09	1	1	1	0.042921	0.000174
ENSG00000168899.4	VAMP5	-2.02263	0.043112	0.023346	3	3	3	0.045354	0.291164
ENSG00000181790.10	ADGRB1	2.02218	0.043158	0.021354	2	2	2	0.040033	0.202308
ENSG00000103876.11	FAH	-2.02084	0.043296	0.02351	2	2	2	0.004706	0.219728
ENSG00000084073.8	ZMPSTE24	2.02065	0.043316	0.000275	2	2	2	0.033321	0.04481
ENSG00000047365.11	ARAP2	2.01984	0.0434	0.010036	3	3	3	0.045594	0.396088
ENSG00000124508.16	BTN2A2	2.01882	0.043506	0.005928	3	3	3	0.078547	0.115621
ENSG00000113838.12	TBCCD1	2.01771	0.043622	0.000108	1	1	1	0.043622	0.019625
ENSG00000133687.15	TMTC1	-2.01752	0.043642	0.454713	3	3	3	0.07019	0.691217
ENSG00000179178.10	TMEM125	2.01637	0.043762	1.43e-06	1	1	1	0.043762	0.003054
ENSG00000177453.7	NIM1K	2.01519	0.043885	0.023249	2	2	2	0.041723	0.332309
ENSG00000169413.2	RNASE6	-2.01332	0.044081	0.041959	2	2	2	0.036429	0.282778
ENSG00000151743.10	AMN1	2.01231	0.044188	0.00034	1	1	1	0.044188	0.029026
ENSG00000025293.16	PHF20	-2.01112	0.044313	0.000799	1	1	1	0.044313	0.061892
ENSG00000138641.15	HERC3	2.01108	0.044317	1.65e-05	1	1	1	0.044317	0.010124
ENSG00000183763.8	TRAIP	2.01072	0.044355	2.08e-05	1	1	1	0.044355	0.0069
ENSG00000146670.9	CDCA5	2.00822	0.044619	1.31e-05	2	2	2	0.112343	0.010307
ENSG00000100281.13	HMGXB4	-2.00812	0.044631	0.002482	1	1	1	0.044631	0.074865
ENSG00000155329.11	ZCCHC10	2.00784	0.04466	0.000483	1	1	1	0.04466	0.135698
ENSG00000125686.11	MED1	2.00748	0.044699	0.000843	2	2	2	0.03992	0.039236
ENSG00000111671.9	SPSB2	-2.0071	0.044739	0.320381	3	3	3	0.043365	0.492131
ENSG00000166800.9	LDHAL6A	-2.00694	0.044756	0.013931	1	1	1	0.044756	0.169051
ENSG00000140632.16	GLYR1	2.00423	0.045046	0.002083	2	2	2	0.019503	0.105057
ENSG00000267454.5	ZNF582-AS1	2.00252	0.045229	0.15751	3	3	3	0.019593	0.342889
ENSG00000278231.1	RP5-906C1.1	-2.0025	0.04523	0.00045	1	1	1	0.04523	0.038878
ENSG00000272308.1	RP11-231G3.1	2.00174	0.045313	0.009914	1	1	1	0.045313	0.153009
ENSG00000155926.13	SLA	2.00126	0.045365	0.008679	3	3	3	0.020566	0.297725
ENSG00000158286.12	RNF207	-2.00058	0.045438	0.011215	1	2	2	0.045438	0.385711
ENSG00000272787.1	KB-226F1.2	1.99942	0.045563	0.21842	2	2	2	0.066271	0.615985
ENSG00000169762.16	TAPT1	1.9974	0.045782	0.023963	2	2	2	0.032745	0.175453
ENSG00000105429.12	MEGF8	-1.99556	0.045982	0.001114	2	2	2	0.045535	0.079841
ENSG00000126254.11	RBM42	-1.99521	0.04602	0.000614	2	2	2	0.042525	0.032462
ENSG00000126602.10	TRAP1	1.99501	0.046042	0.057284	2	2	2	0.029632	0.359953
ENSG00000167723.14	TRPV3	-1.99406	0.046145	0.009083	2	2	2	0.013058	0.143233
ENSG00000230615.6	RP5-1198O20.4	1.99013	0.046577	0.000111	1	1	1	0.046577	0.021499
ENSG00000151502.10	VPS26B	1.98962	0.046633	0.000777	2	2	2	0.091556	0.041863
ENSG00000197879.14	MYO1C	-1.98952	0.046644	0.007456	2	2	2	0.011812	0.125084
ENSG00000135482.6	ZC3H10	-1.98771	0.046844	0.000118	1	1	1	0.046844	0.047301
ENSG00000169885.9	CALML6	-1.98716	0.046905	0.0082	2	2	2	0.049762	0.146857
ENSG00000260456.6	C16orf95	-1.98711	0.046911	0.009328	1	1	1	0.046911	0.133421
ENSG00000165392.9	WRN	-1.98694	0.046929	0.002877	2	2	2	0.037818	0.137441
ENSG00000153012.11	LGI2	1.98686	0.046937	0.012235	1	1	1	0.046937	0.212803
ENSG00000078814.15	MYH7B	-1.98588	0.047046	0.018429	2	2	2	0.057568	0.240532
ENSG00000104388.14	RAB2A	-1.98421	0.047232	0.00735	2	2	2	0.033549	0.132523
ENSG00000175764.14	TTLL11	-1.98343	0.04732	0.097772	2	2	2	0.056192	0.263952
ENSG00000158428.3	CATIP	1.98316	0.04735	0.03147	1	1	1	0.04735	0.4161
ENSG00000164181.13	ELOVL7	1.98284	0.047385	0.024209	2	2	2	0.042793	0.158867
ENSG00000121578.12	B4GALT4	-1.98009	0.047693	0.0447	4	4	4	0.060619	0.272187
ENSG00000272341.1	RP1-151F17.2	1.97925	0.047788	0.005502	1	1	1	0.047788	0.10819
ENSG00000178075.19	GRAMD1C	1.97908	0.047807	0.026857	2	2	2	0.035613	0.243146
ENSG00000272462.2	U91328.19	1.97784	0.047947	0.050652	3	3	3	0.016824	0.427025
ENSG00000162482.4	AKR7A3	-1.9774	0.047996	4.69e-06	1	1	1	0.047996	0.005667
ENSG00000267060.5	PTGES3L	1.9757	0.048189	0.008773	1	1	1	0.048189	0.164801
ENSG00000172830.12	SSH3	-1.97384	0.0484	0.022204	4	4	4	0.061163	0.91044
ENSG00000075399.13	VPS9D1	1.97299	0.048497	0.015666	3	3	3	0.012912	0.121289
ENSG00000101220.17	C20orf27	-1.97265	0.048536	0.084609	3	3	3	0.043637	0.623384
ENSG00000177707.10	NECTIN3	-1.97258	0.048543	0.002614	1	1	1	0.048543	0.18813
ENSG00000254901.7	BORCS8	1.97167	0.048648	0.001186	1	1	1	0.048648	0.049022
ENSG00000105996.6	HOXA2	1.96968	0.048875	0.087764	2	2	2	0.052862	0.420921
ENSG00000103489.11	XYLT1	-1.96864	0.048995	0.034249	2	2	2	0.056022	0.208436
ENSG00000134247.9	PTGFRN	-1.96846	0.049015	0.004485	1	1	1	0.049015	0.150395
ENSG00000172869.14	DMXL1	-1.96832	0.049031	0.000166	1	1	1	0.049031	0.026623
ENSG00000156990.14	RPUSD3	-1.96668	0.04922	0.010809	1	1	1	0.04922	0.309852
ENSG00000151466.11	SCLT1	1.96608	0.04929	0.005201	2	2	2	0.099405	0.145517
ENSG00000137497.17	NUMA1	-1.96445	0.049478	0.005088	1	2	2	0.049478	0.100084
ENSG00000138411.10	HECW2	1.96341	0.049599	0.004917	3	3	3	0.142927	0.28876
ENSG00000265478.2	CTD-2145A24.5	1.96329	0.049612	0.000113	1	1	1	0.049612	0.018745
ENSG00000137040.9	RANBP6	-1.9628	0.049669	0.000602	1	1	1	0.049669	0.044982
ENSG00000107263.18	RAPGEF1	1.96248	0.049707	0.083047	1	1	1	0.049707	0.434473
ENSG00000158435.7	CNOT11	-1.96058	0.049928	0.001004	2	2	2	0.059815	0.083964
ENSG00000140577.15	CRTC3	1.96034	0.049956	0.009327	2	2	2	0.013787	0.151833
