# Supplementary material for: A cross-scale multimodal framework identifies clinically actionable immunotherapy biomarkers in melanoma through bulk to single-cell and spatial transcriptomics integration
Source: Research Square preprint supplement (doi:10.21203/rs.3.rs-7167024/v1), 2025-09-22
Supplement: Supplementary file 2 [file a5f5e2ba21d68ea2aa100642.docx]

**Multimodal Integration of Molecular Subtypes and Prognostic Markers in SKCM: Insights from Data-Driven Analysis and Spatial Transcriptomics**

Wuda Huoshen, Kun Yuan, Junkai Xiong, Yifei Wang, Yun Xie, Qian Yuan, Xinyue Zhang, Chen Sun, Sha Yi

**Supplementary Figures**


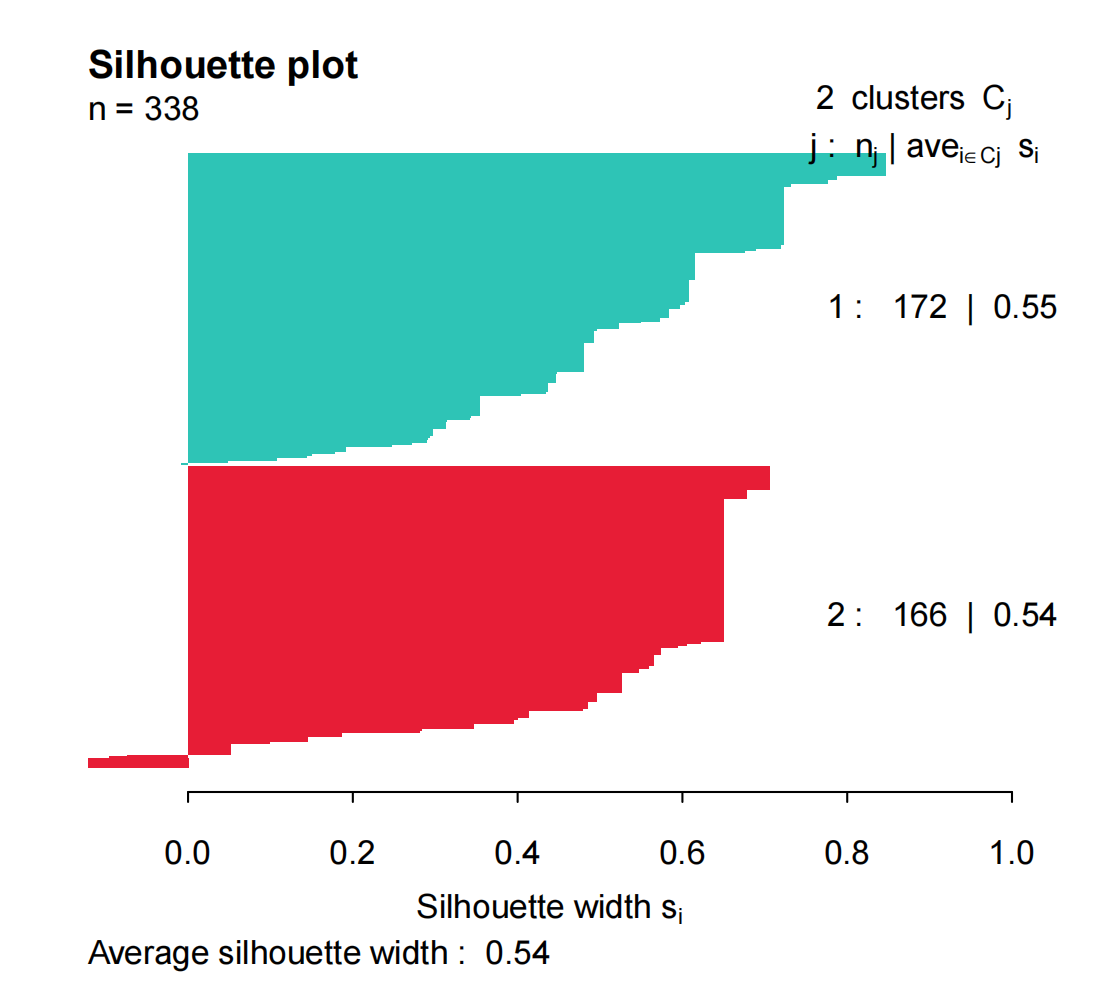


Figure S1. The sample similarity of each subgroup was assessed by calculating the Silhoutte score.


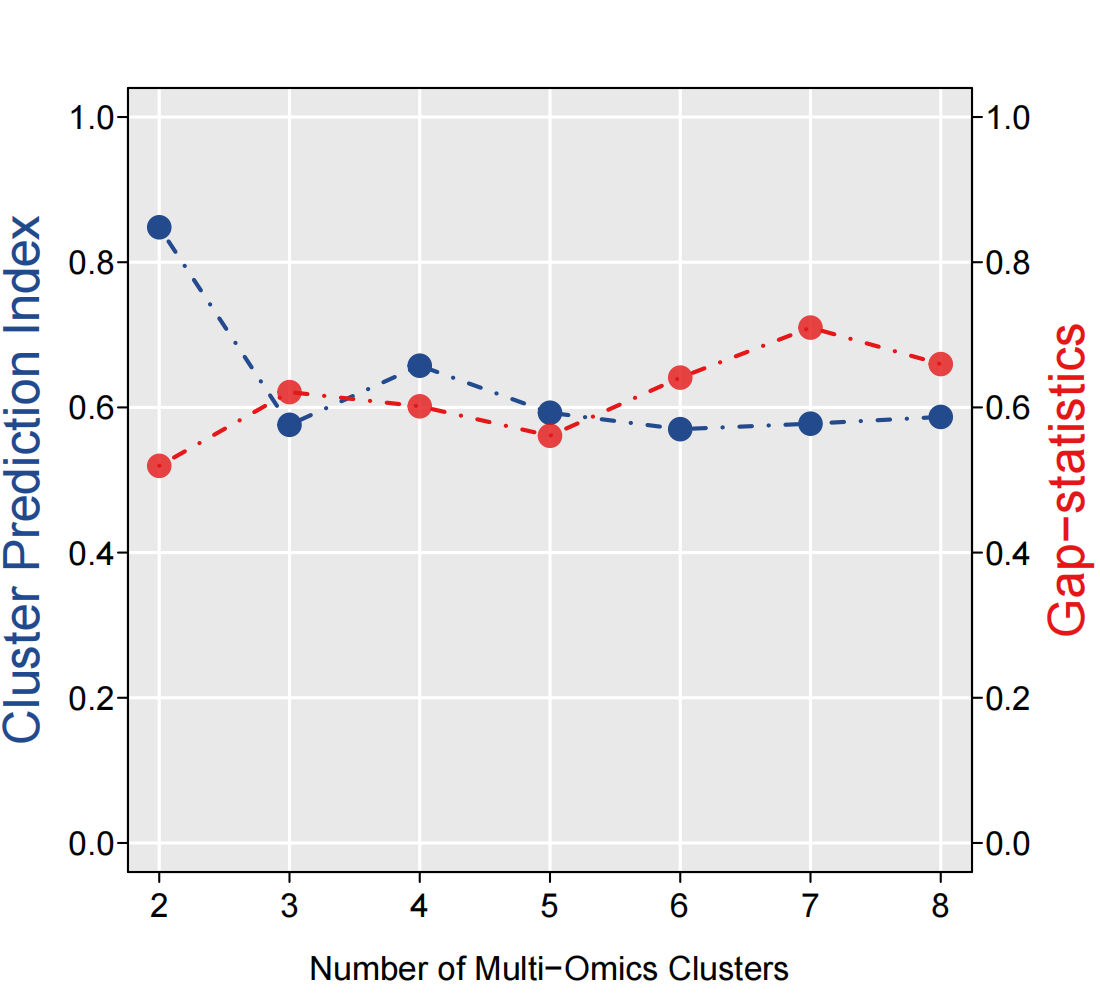


Figure S2. The cluster prediction index and gap statistical analysis of the multi-omics clusters.


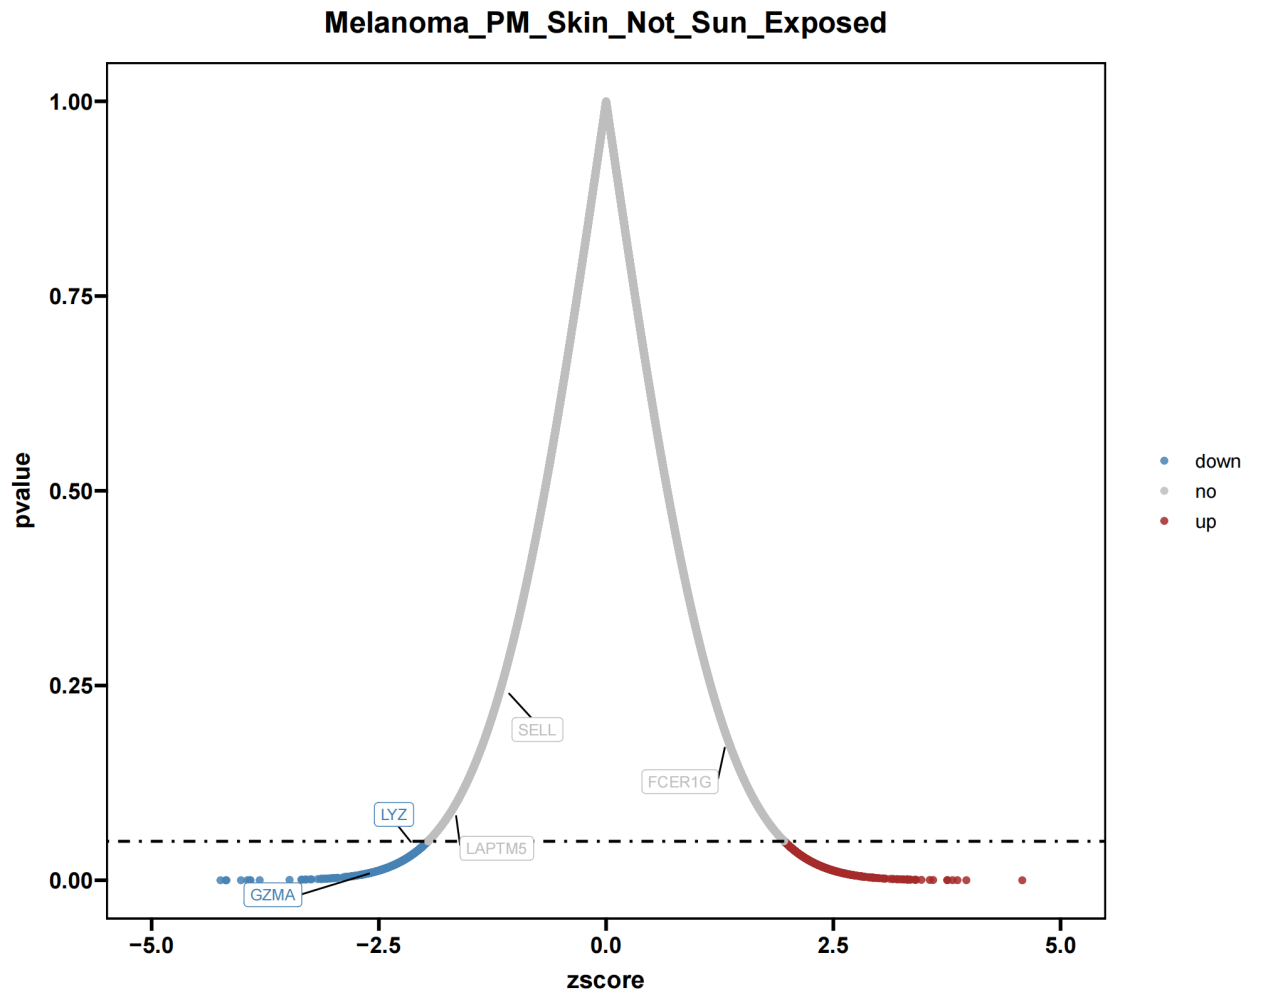


Table S3. The TWAS analysis validation results of TCGA and meta-GEO cohorts in Skin Not Sun Exposed Suprapubic.


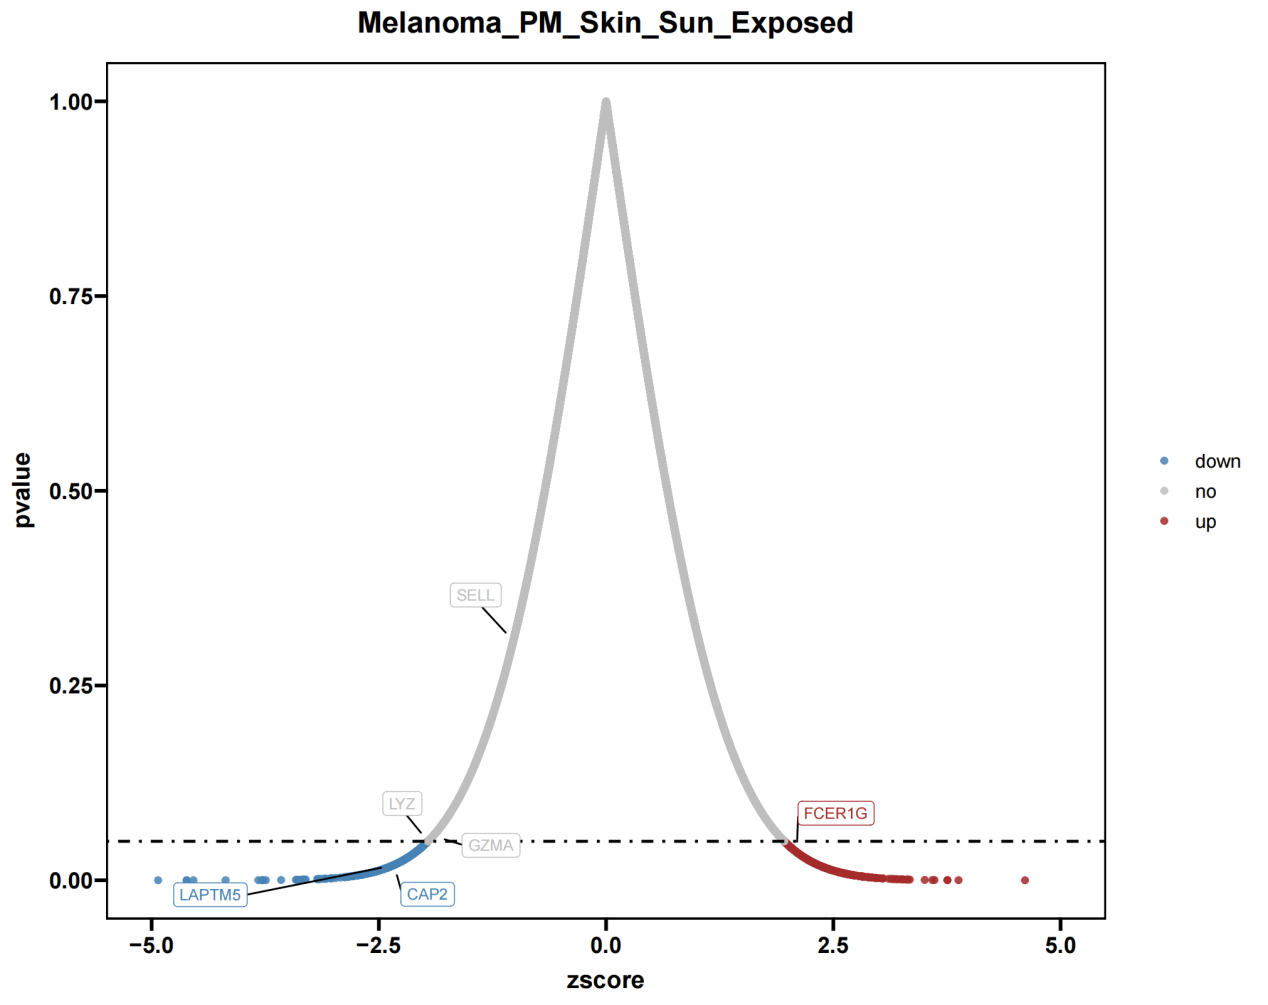


Table S4. The TWAS analysis validation results of TCGA and meta-GEO cohorts in Skin Sun Exposed Lower leg.


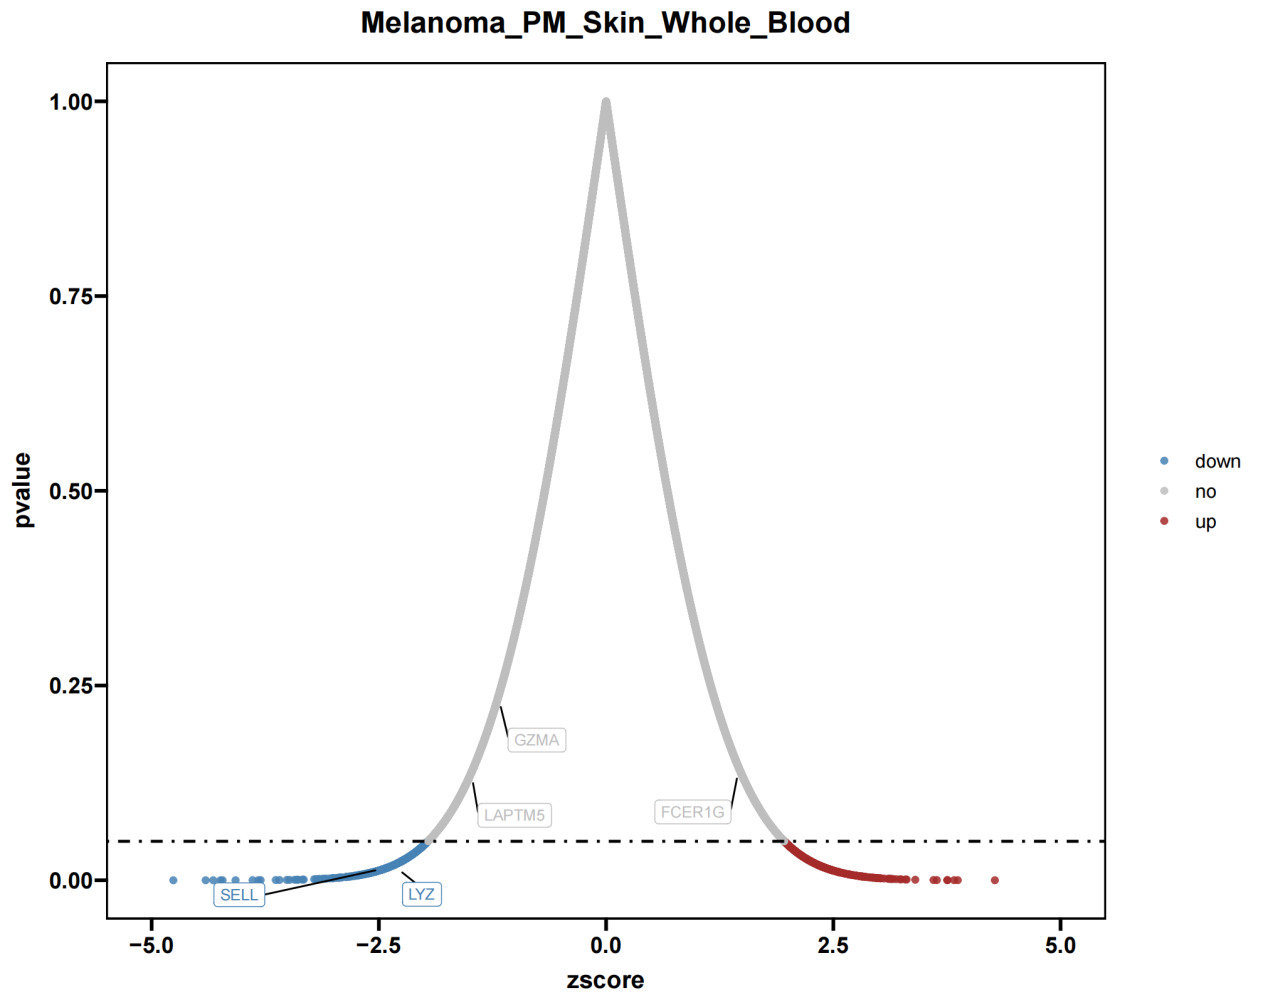


Table S5. The TWAS analysis validation results of TCGA and meta-GEO cohorts in Whole Blood.


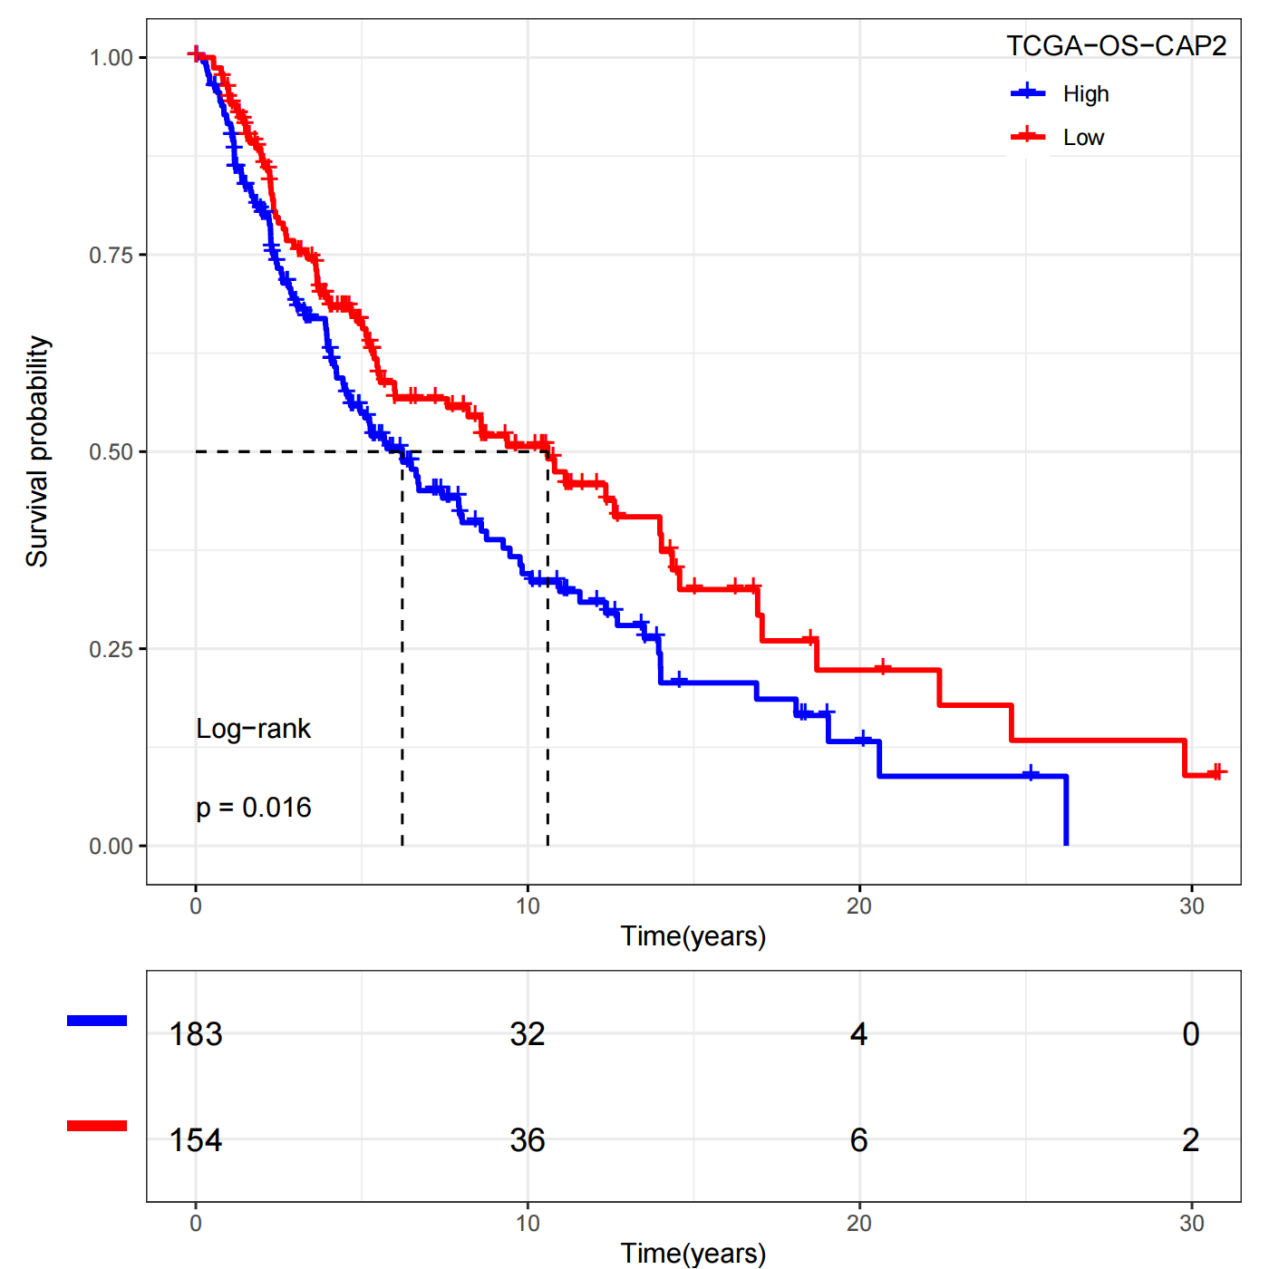


Figure S6. The single-gene expression analysis and OS survival analysis of CAP2 in TCGA cohorts.


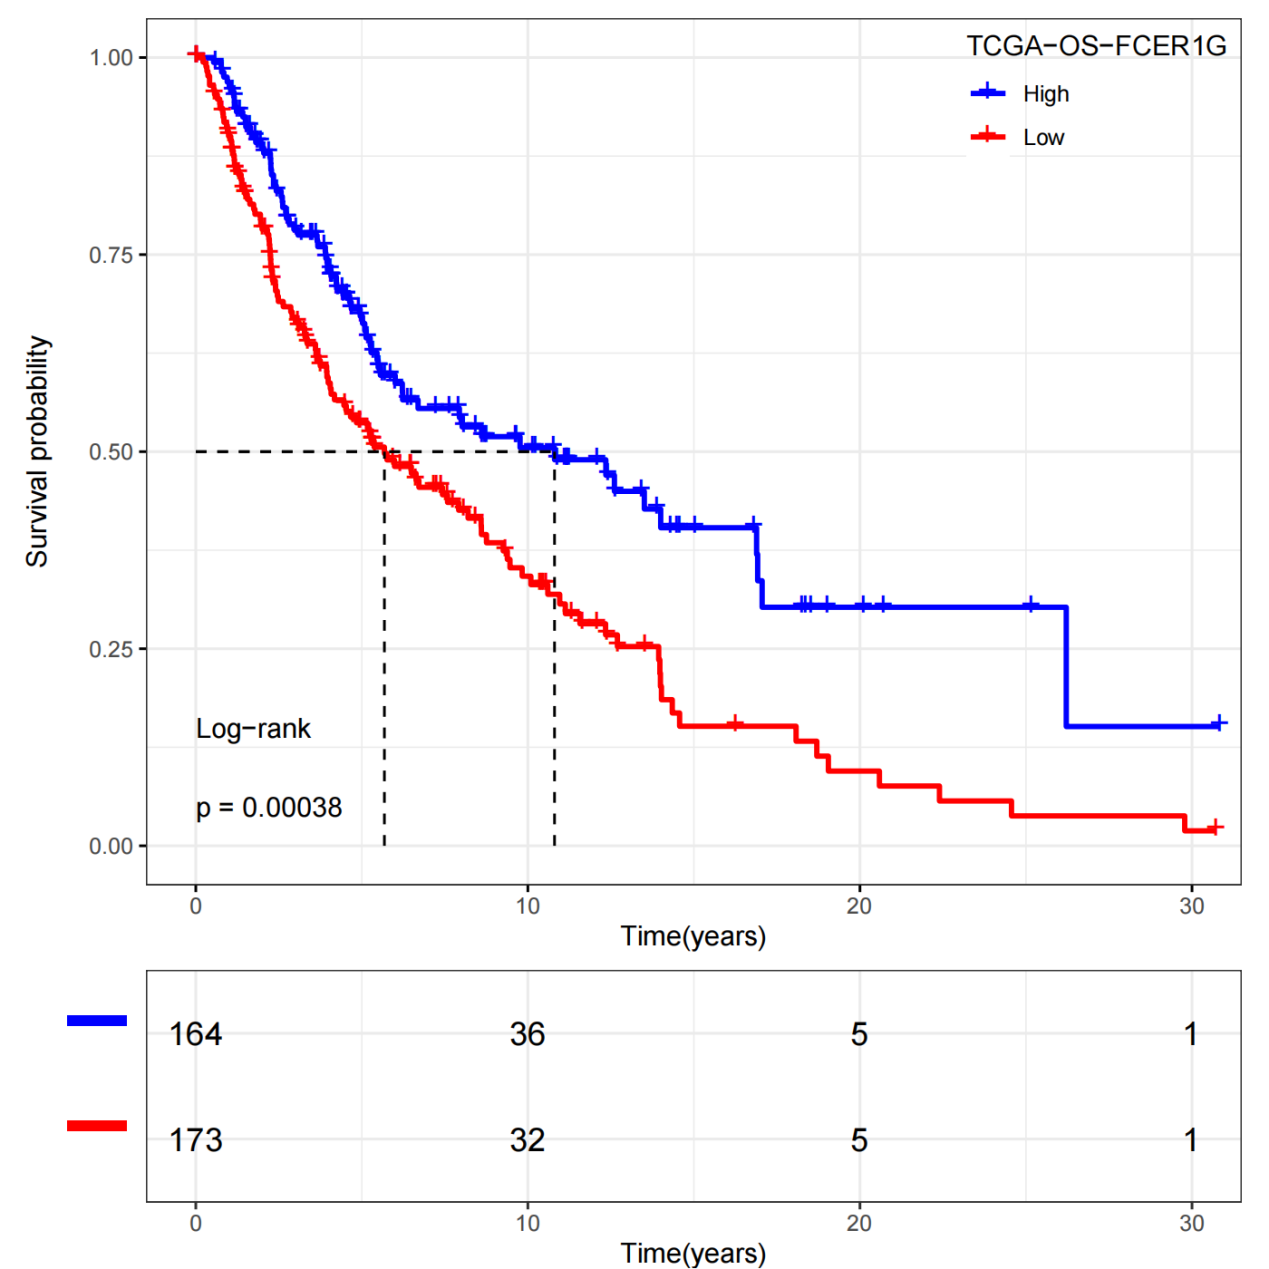


Figure S7. The single-gene expression analysis and OS survival analysis of FCER1G in TCGA cohorts.


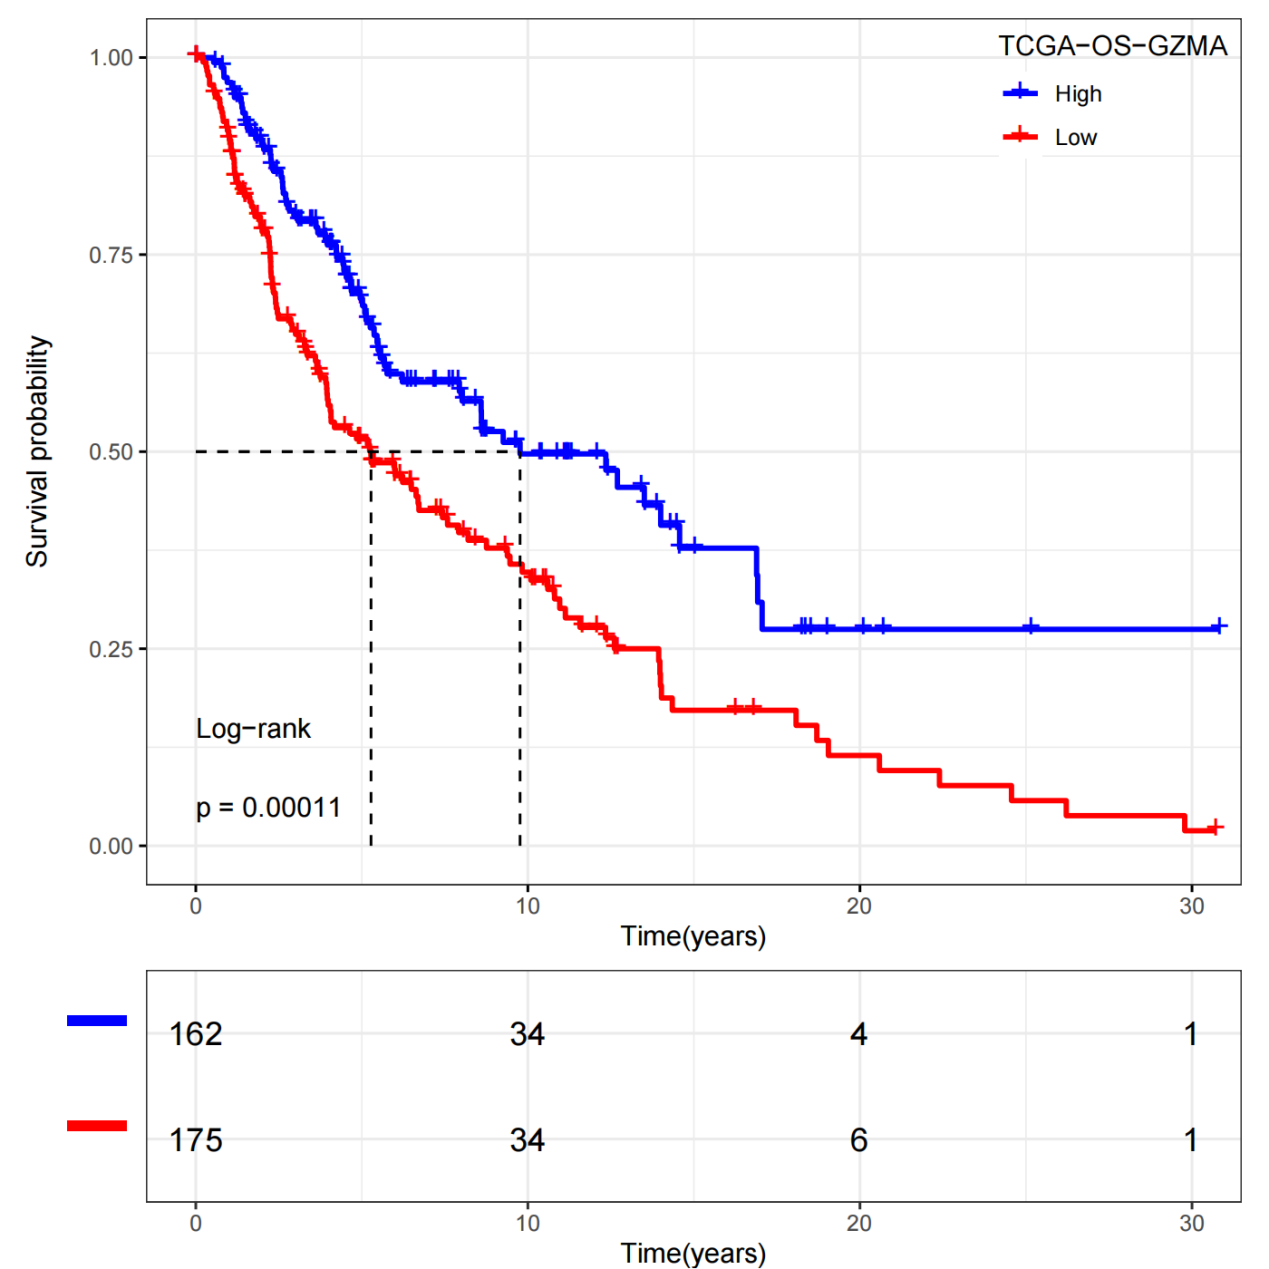


Figure S8. The single-gene expression analysis and OS survival analysis of GZMA in TCGA cohorts.


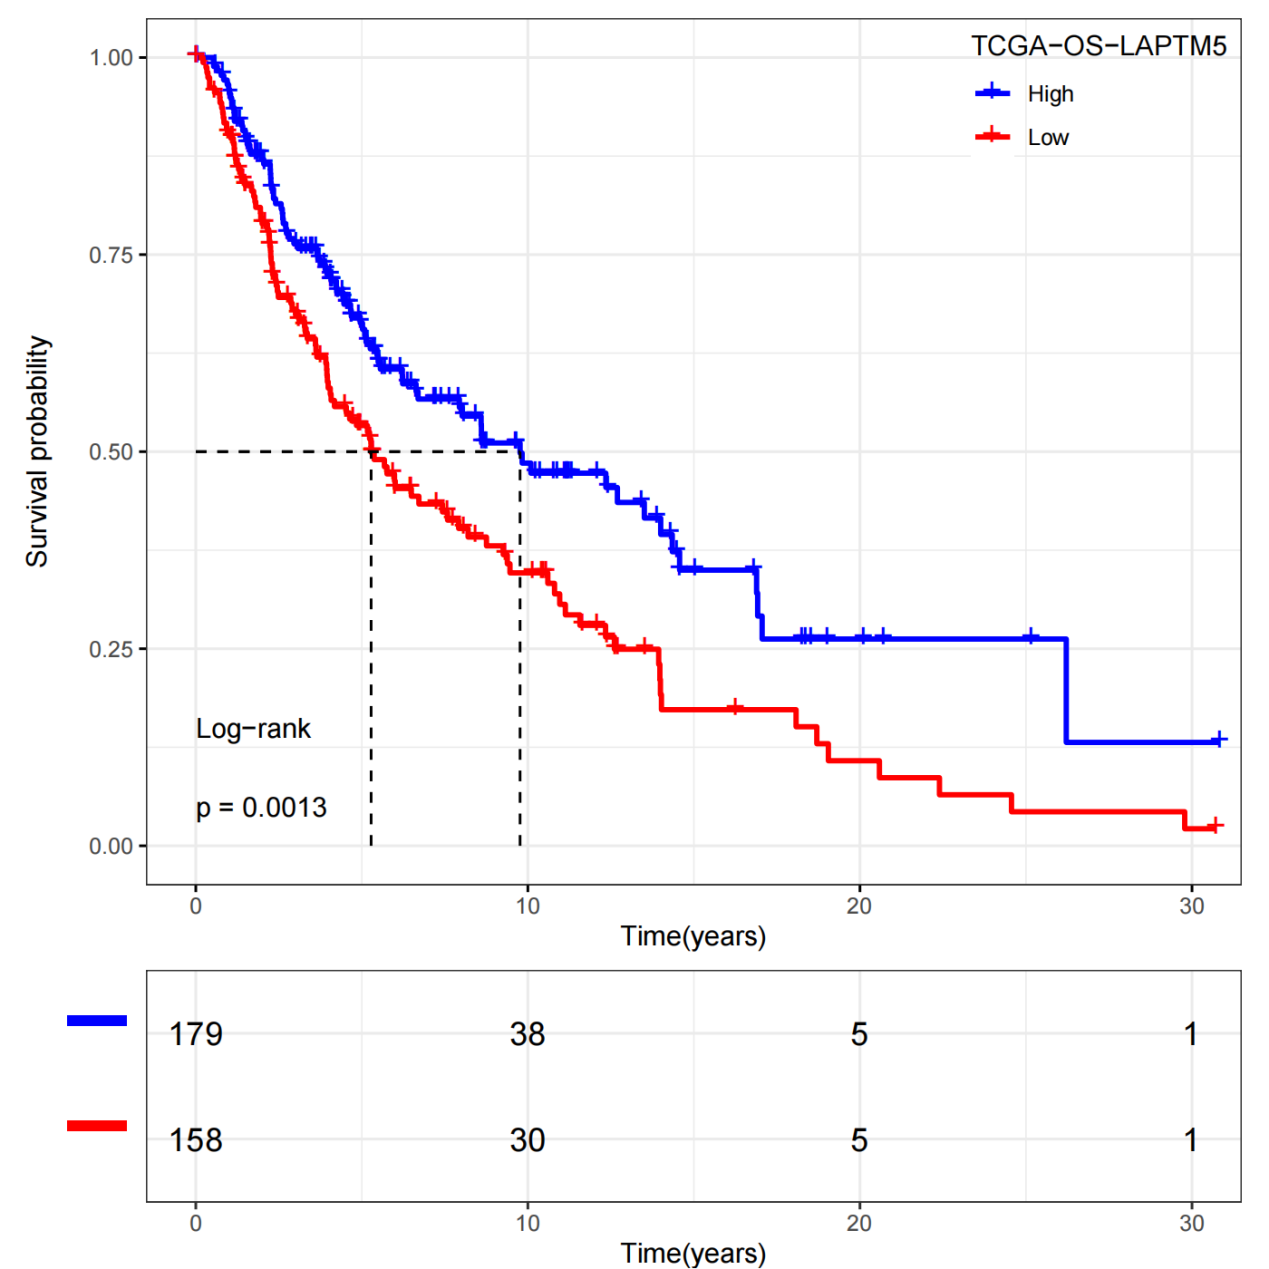


Figure S9. The single-gene expression analysis and OS survival analysis of LAPTM5 in TCGA cohorts.


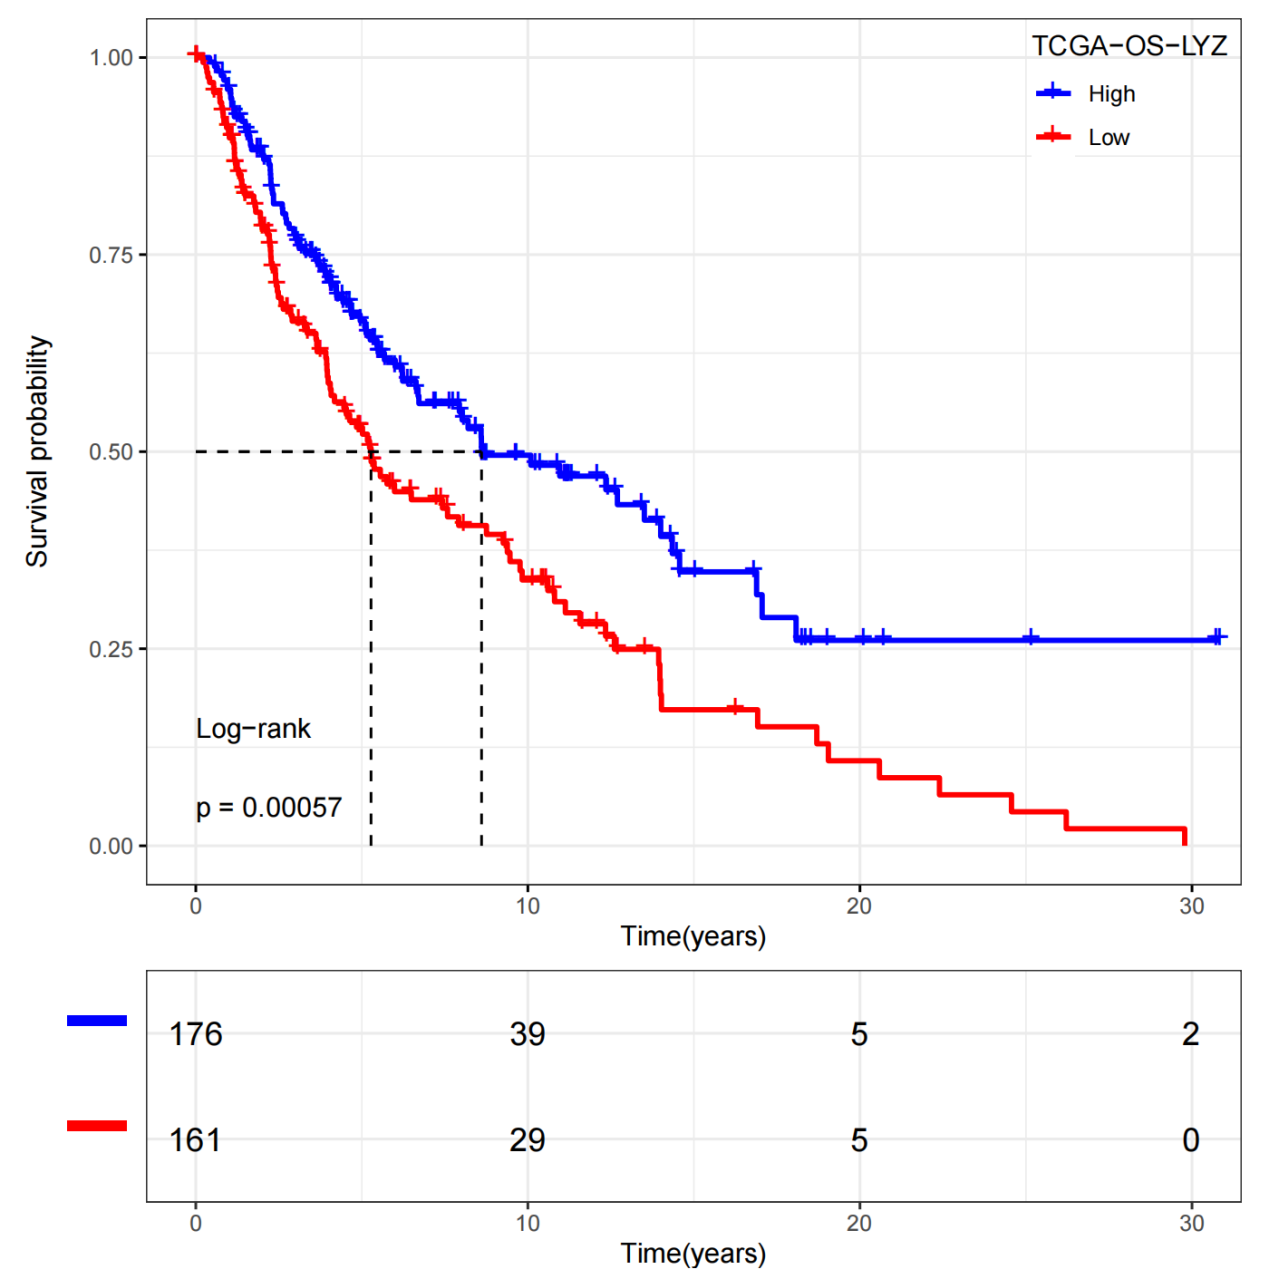
Figure S10. The single-gene expression analysis and OS survival analysis of LYZ in TCGA cohorts.


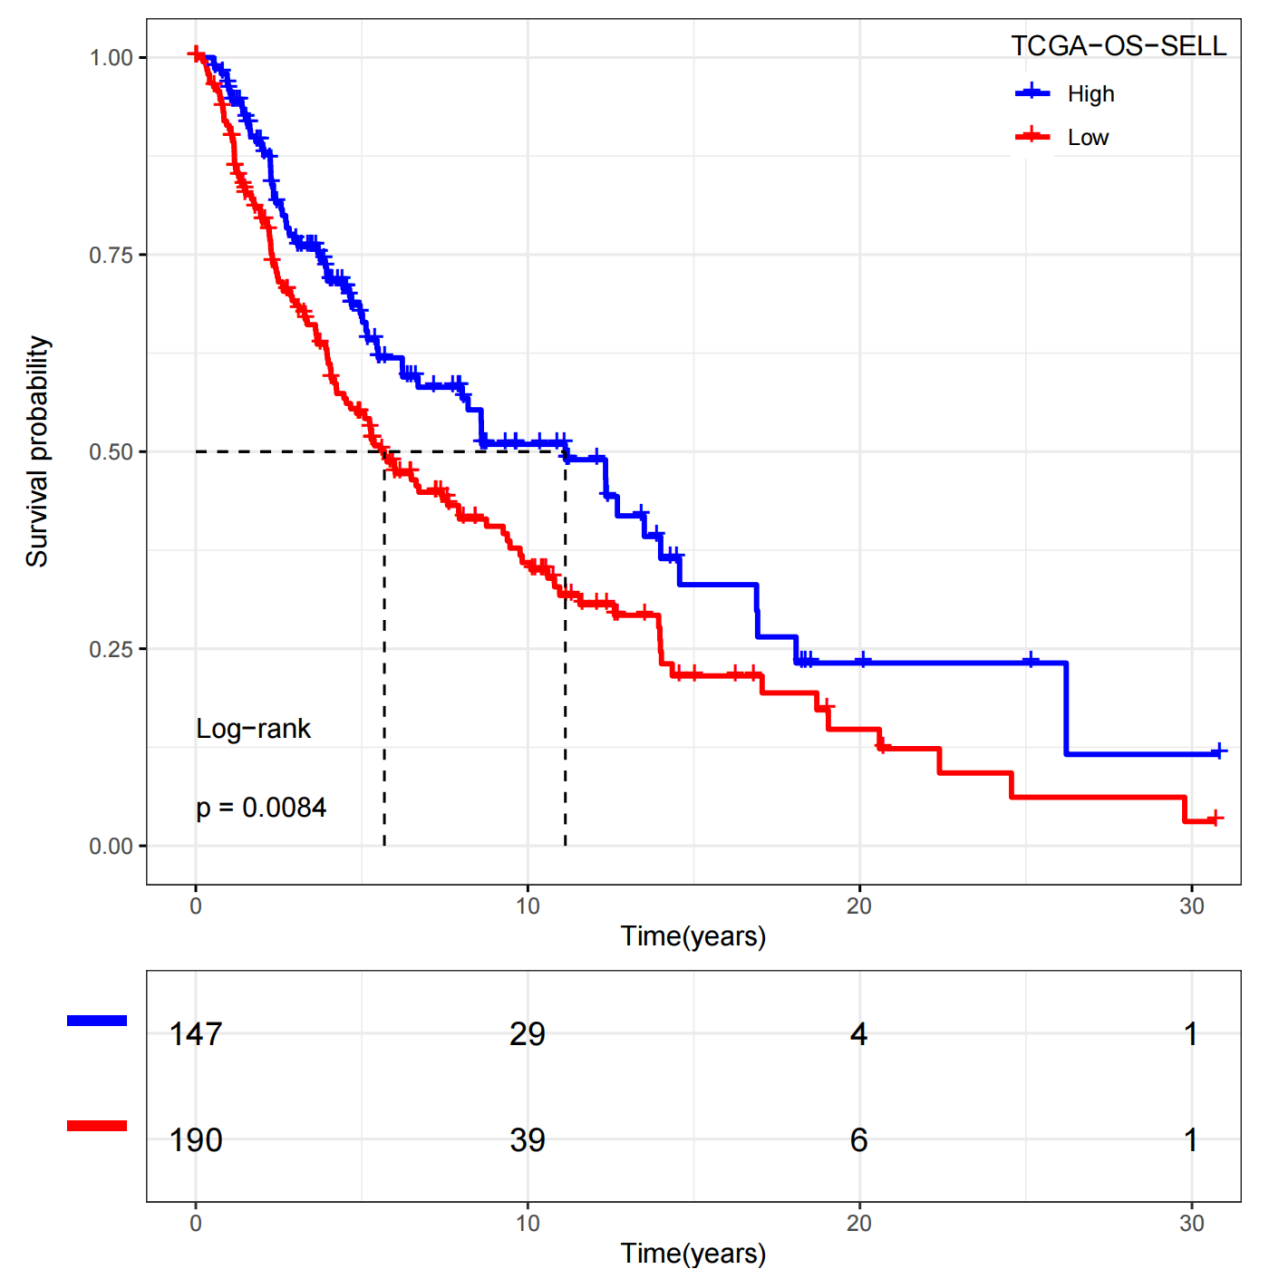


Figure S11. The single-gene expression analysis and OS survival analysis of SELL in TCGA cohorts.


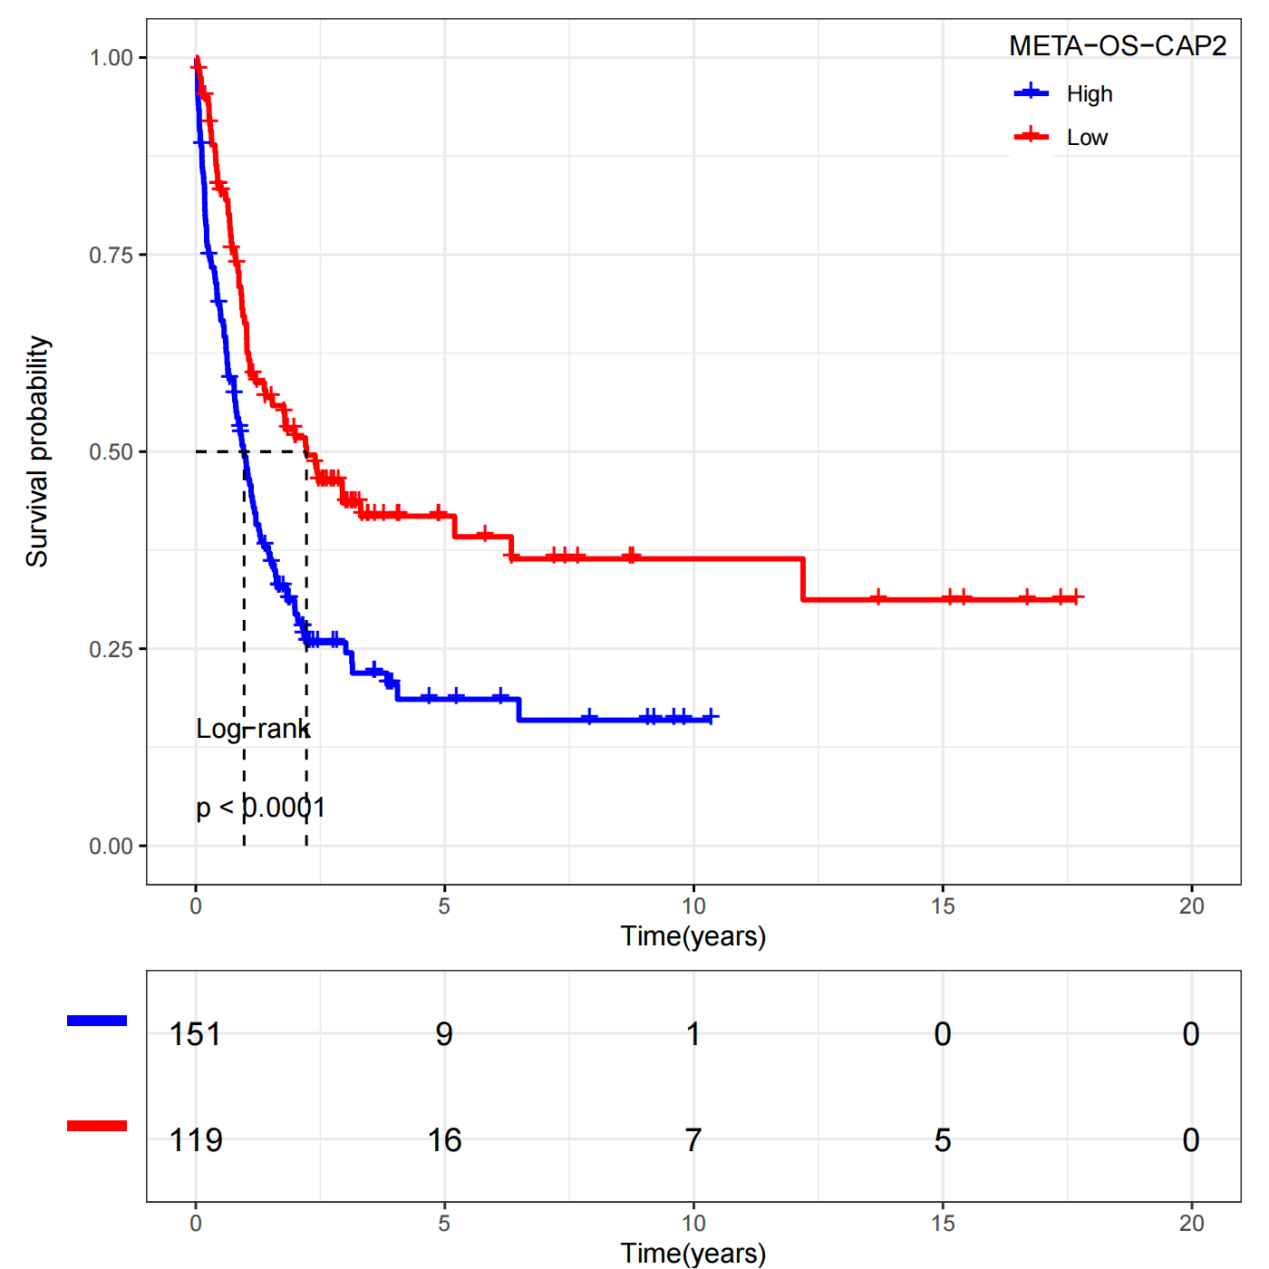
Figure S12. The single-gene expression analysis and OS survival analysis of CAP2 in meta-GEO cohorts.


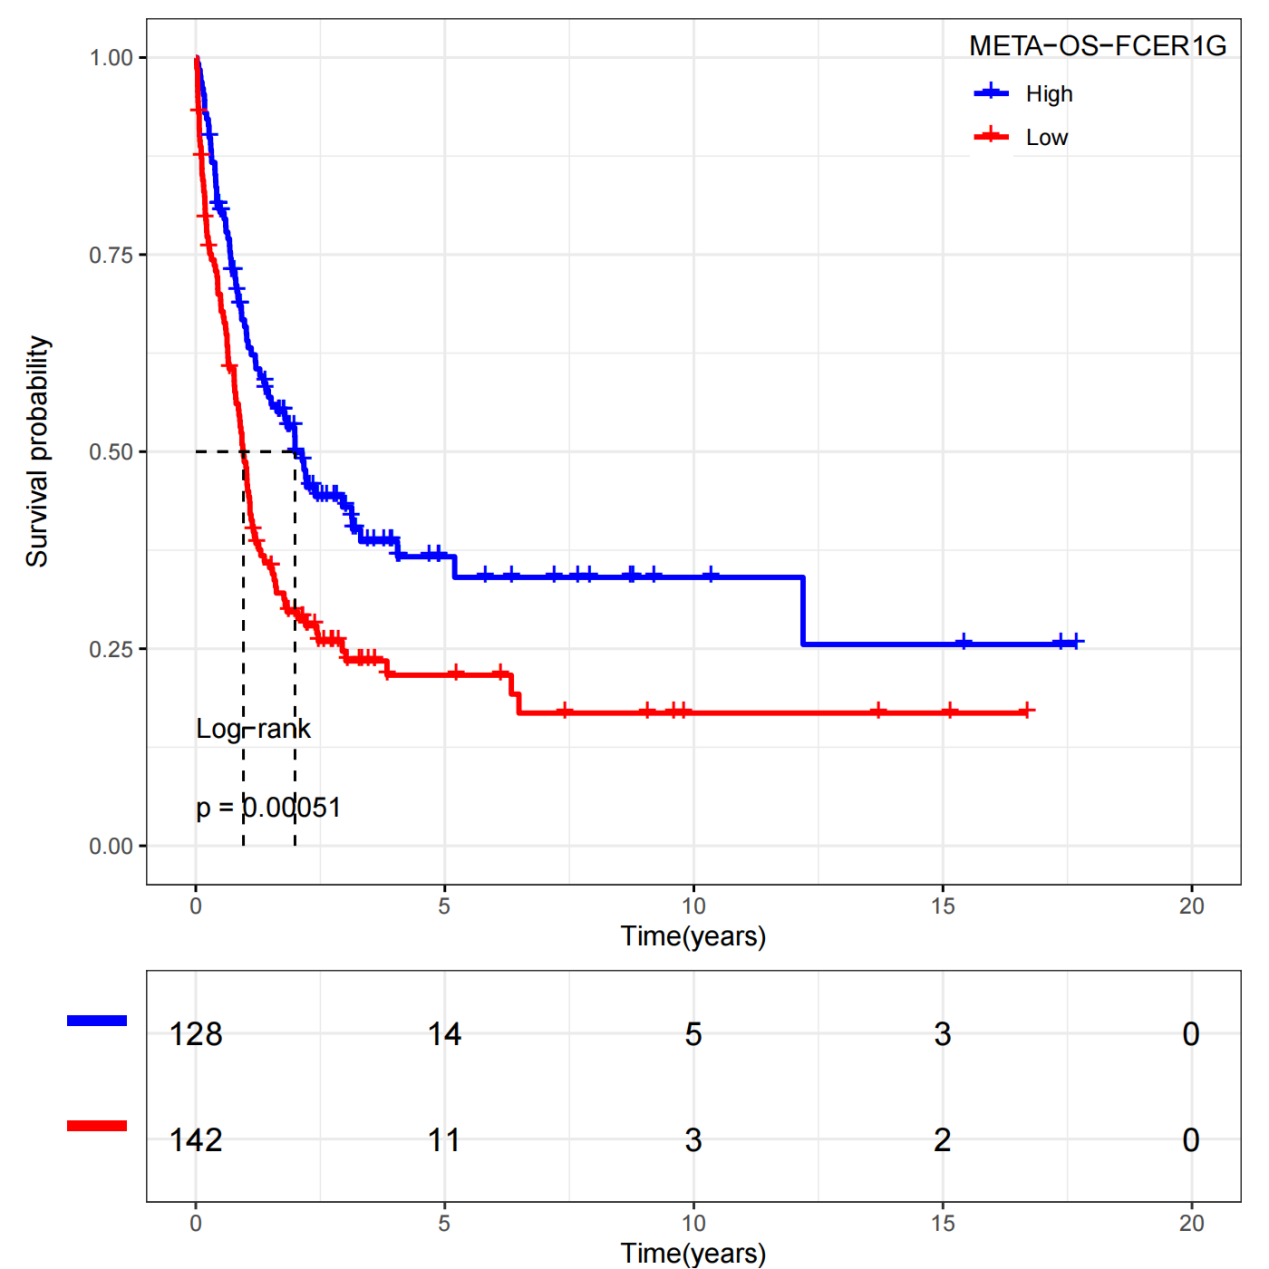
Figure S13. The single-gene expression analysis and OS survival analysis of FCER1G in meta-GEO cohorts.
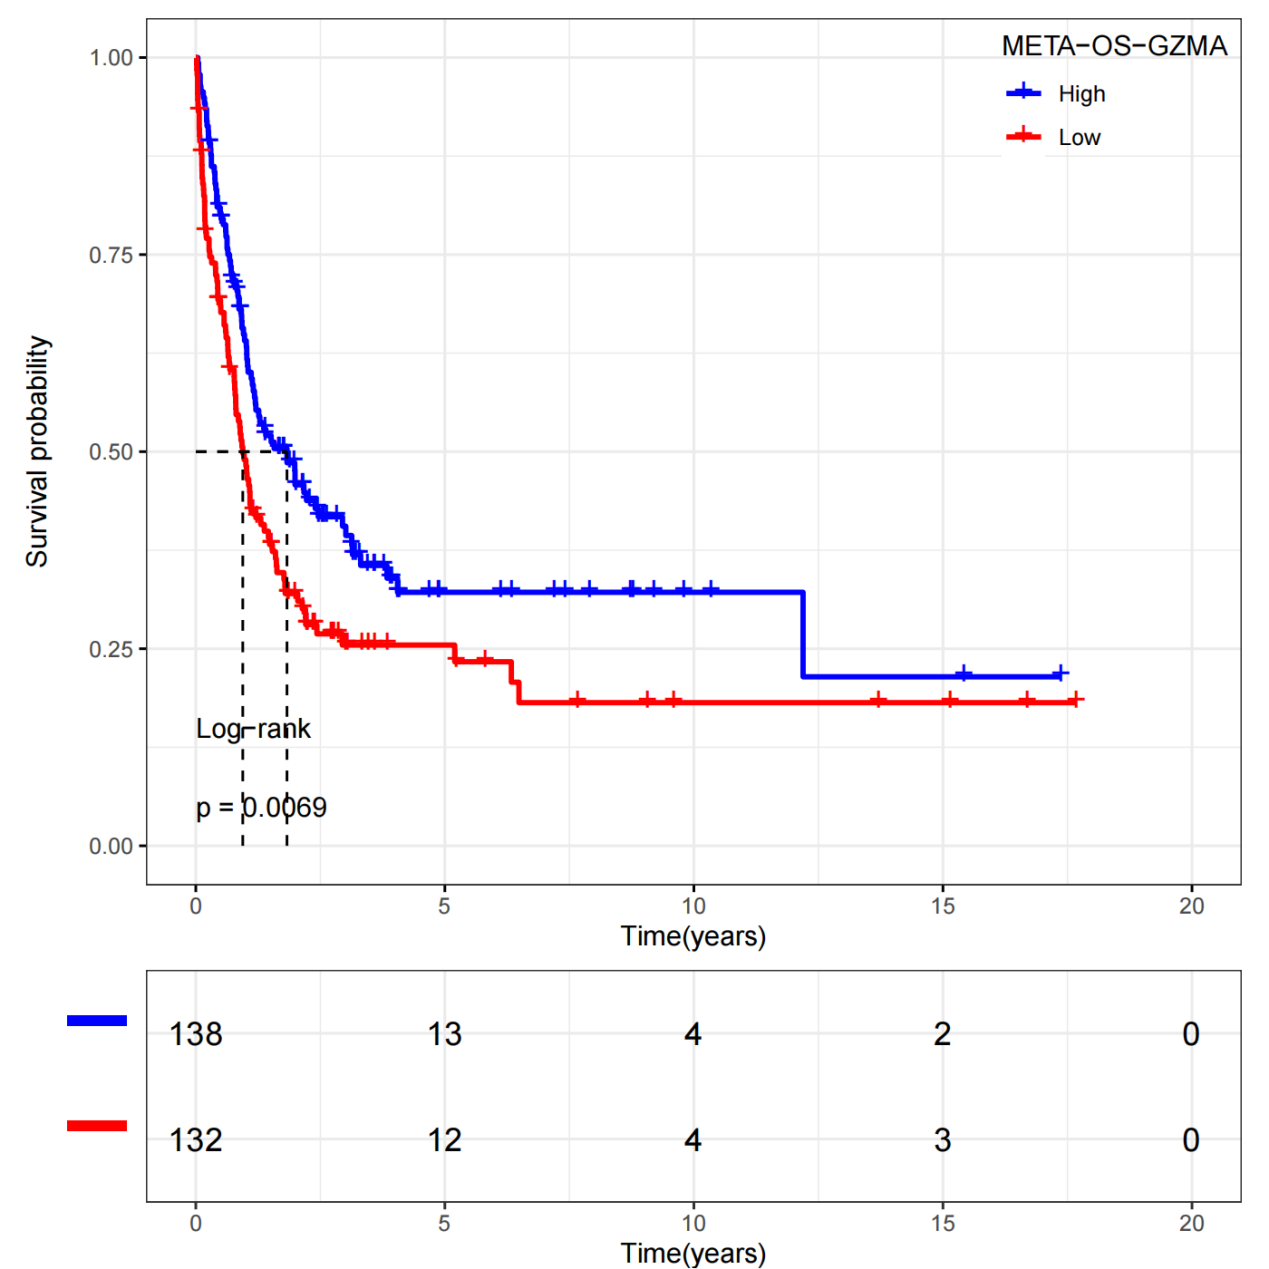
Figure S14. The single-gene expression analysis and OS survival analysis of GZMA in meta-GEO cohorts.
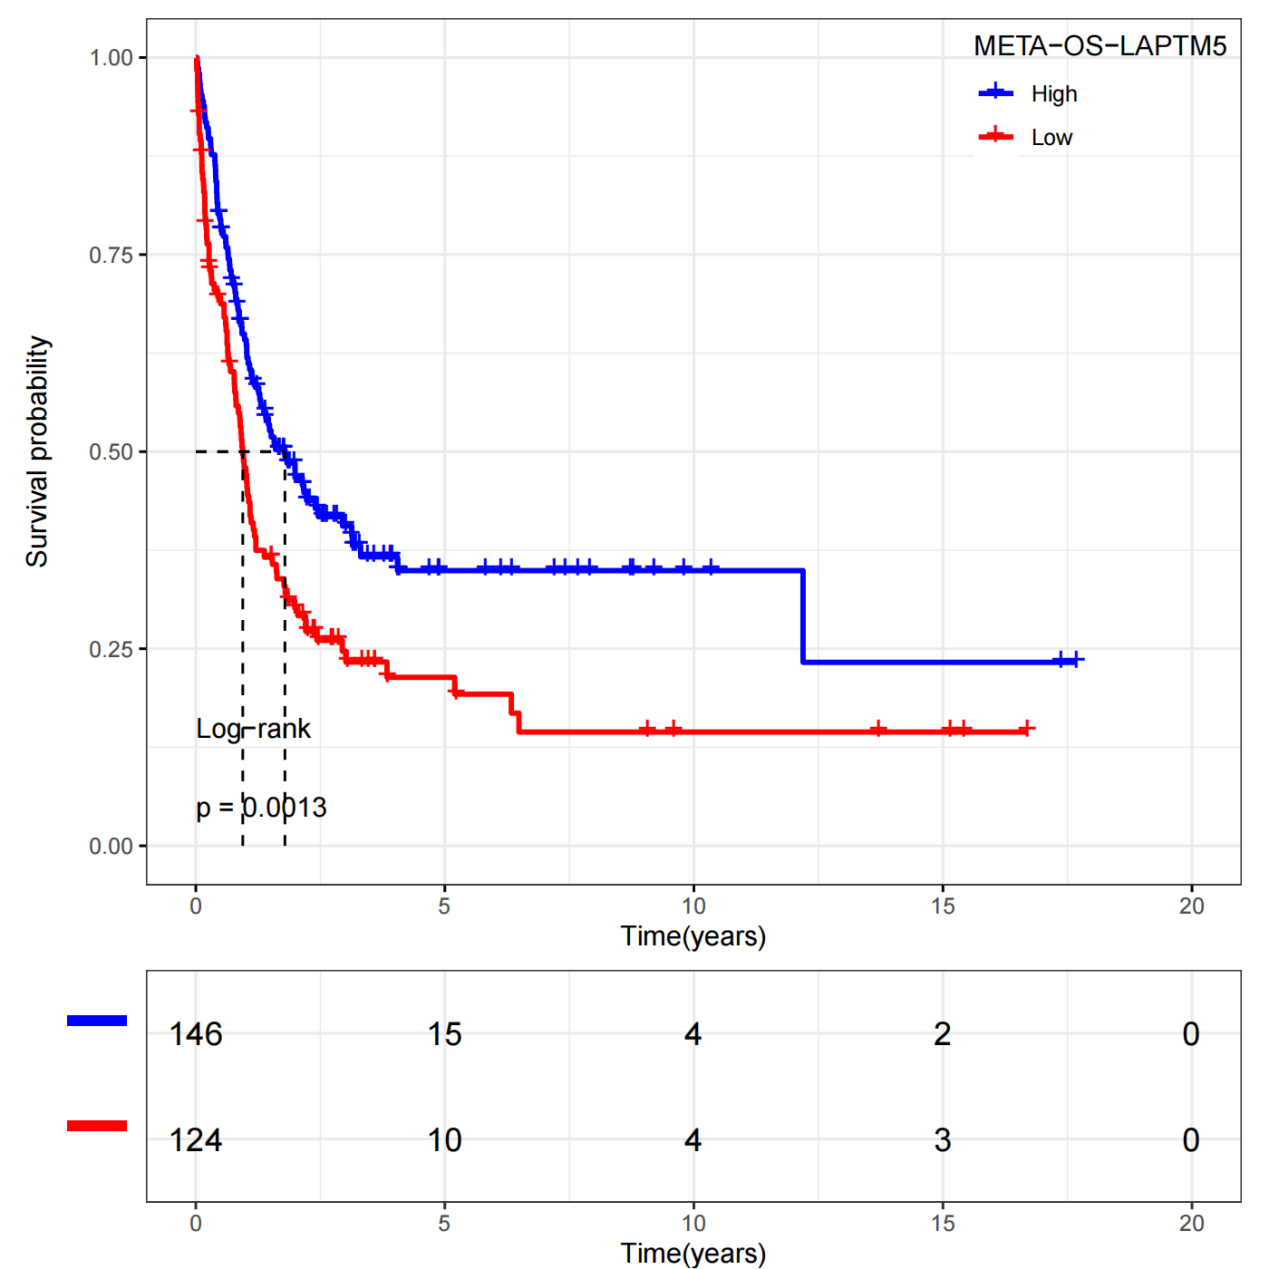


Figure S15. The single-gene expression analysis and OS survival analysis of LAPTM5 in meta-GEO cohorts.
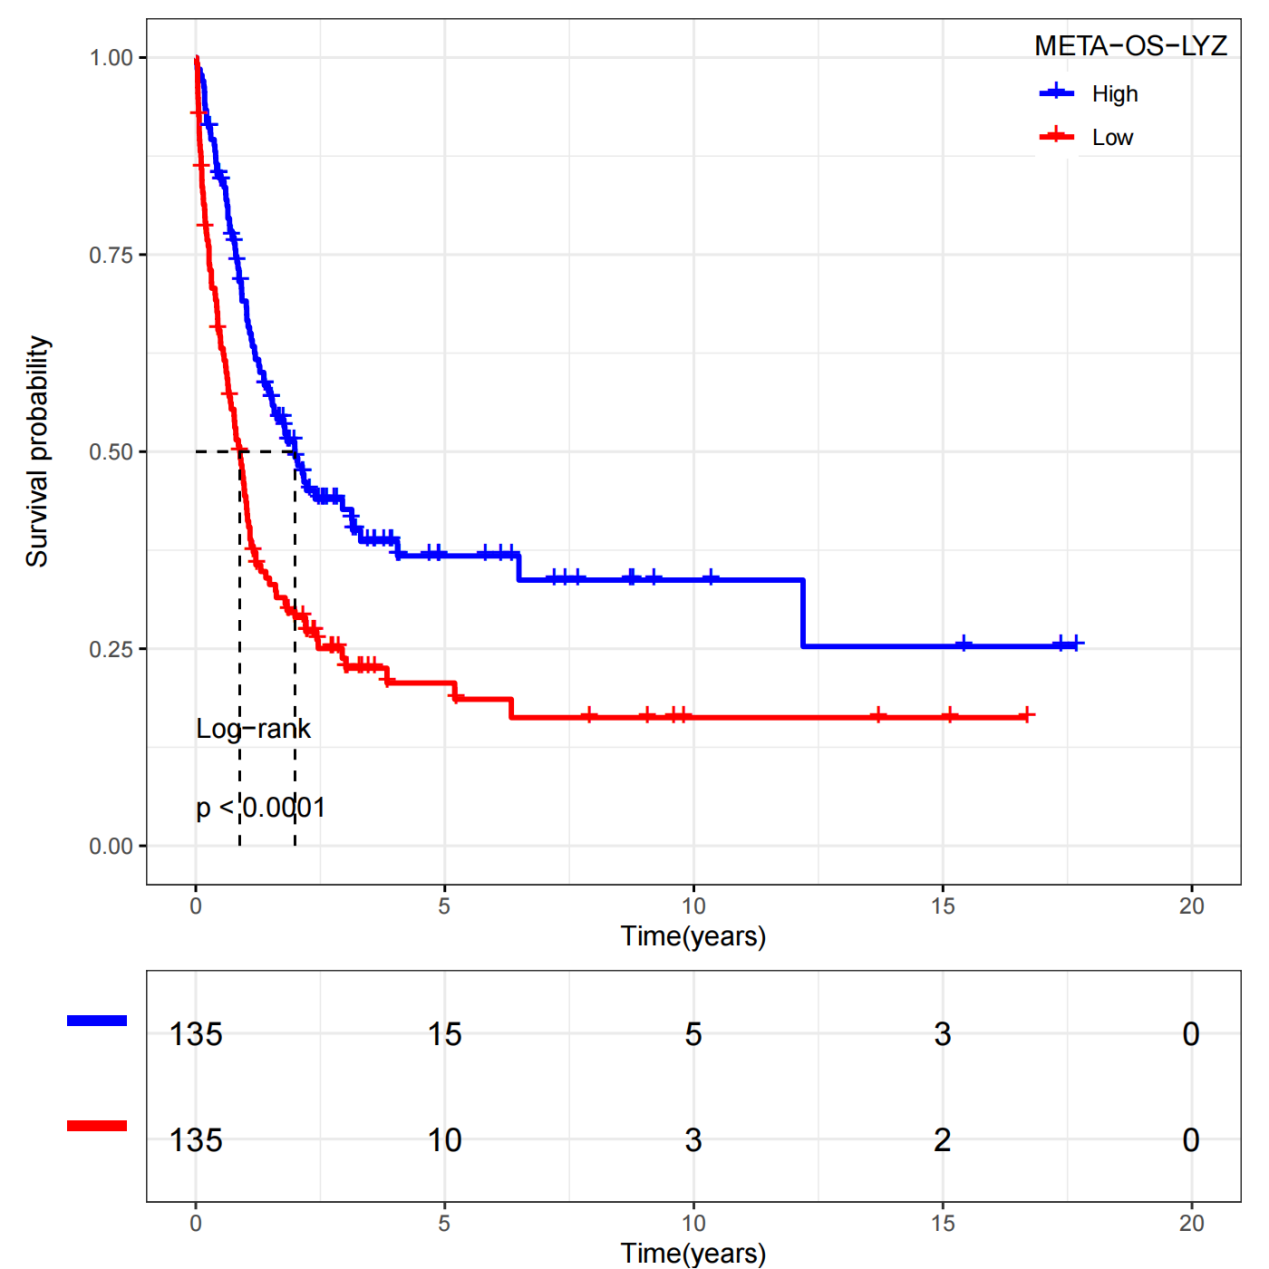
Figure S16. The single-gene expression analysis and OS survival analysis of LYZ in meta-GEO cohorts.
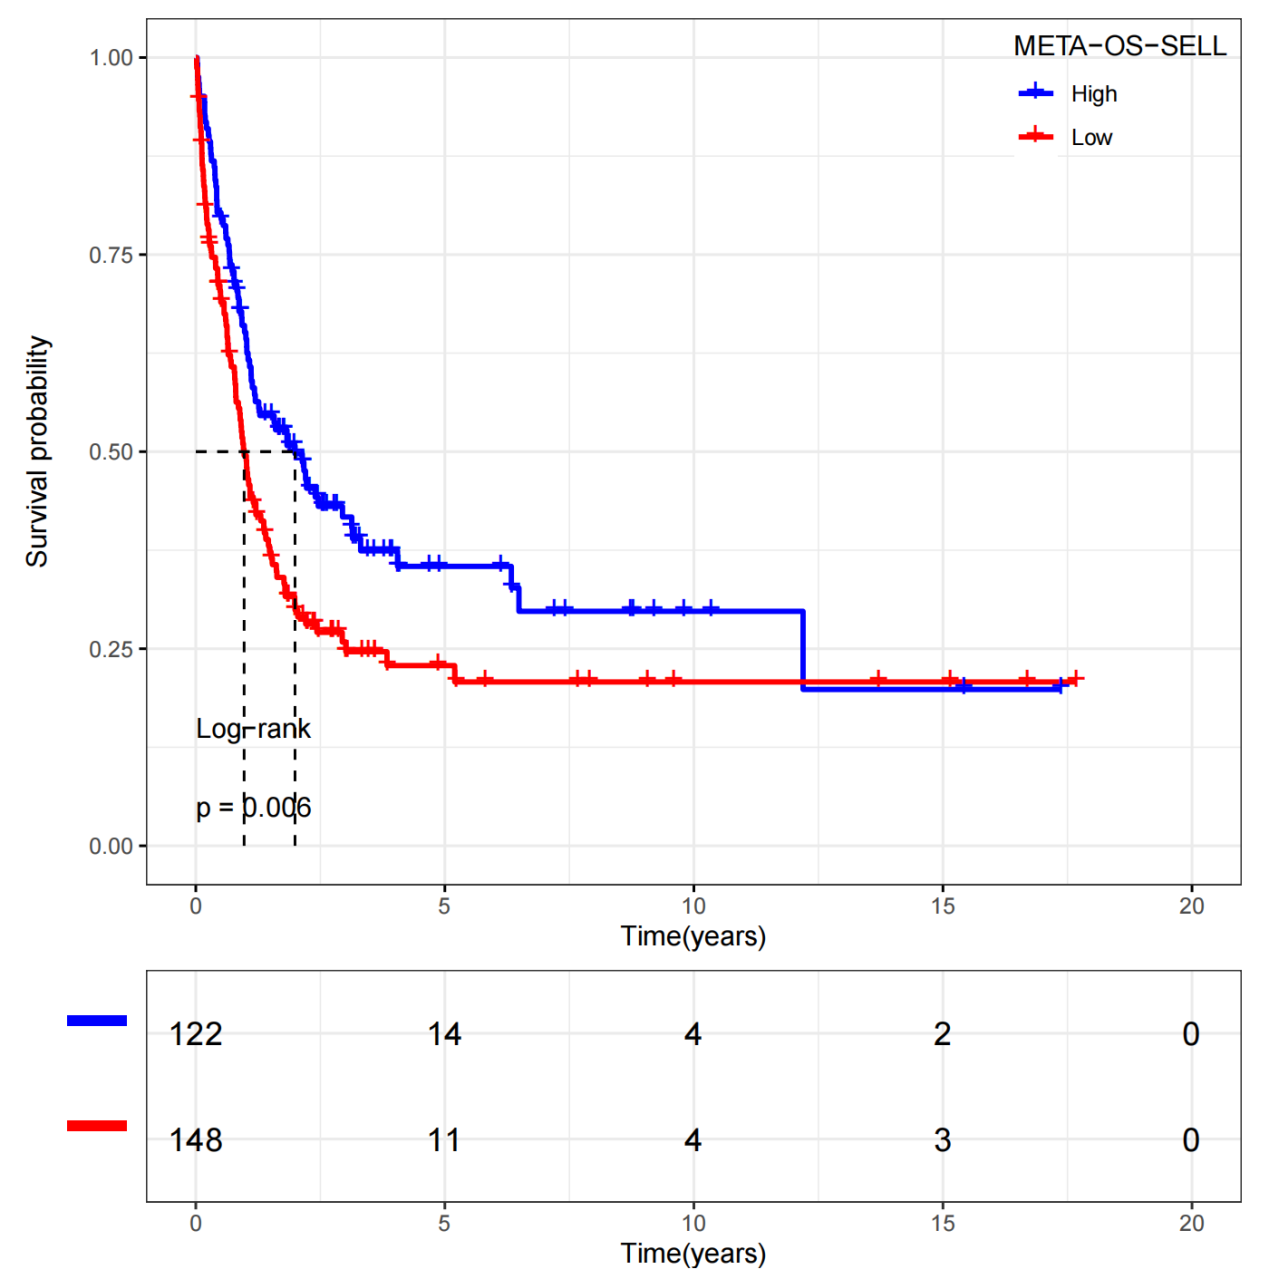


Figure S17. The single-gene expression analysis and OS survival analysis of SELL in meta-GEO cohorts.
